# Supplementary material
Source: publisher site journal article supplement (https://www.spandidos-publications.com/1673/downloadSupplementary)
Supplement: Supplementary file 1 [file downloadSupplementary]

## Sheet: supplementary table 3
Table SIII. The first 5 miRNAs for each circRNA
circRNA	miRNA	miRNA	miRNA	miRNA	miRNA
chr1:236187370-236201553+	hsa-miR-1178-3p	hsa-miR-3650	hsa-miR-7156-3p	hsa-miR-6827-5p	hsa-miR-5580-5p
chrM:7998-15626-	hsa-miR-4640-3p	hsa-miR-6798-3p	hsa-miR-566	hsa-miR-589-5p	hsa-miR-499a-3p
chr20:18513308-18523046+	hsa-miR-432-3p	hsa-miR-323a-5p	hsa-miR-6741-5p	hsa-miR-23b-3p	hsa-miR-23a-3p
chr1:212529968-212530626+	hsa-miR-7153-5p	hsa-miR-146a-5p	hsa-miR-146b-5p	hsa-miR-3128	hsa-miR-3614-5p
chr15:55657386-55664242-	hsa-miR-4461	hsa-miR-4786-5p	hsa-miR-6516-3p	hsa-miR-6733-5p	hsa-miR-548s
chr11:46801744-46810323-	hsa-miR-5196-3p	hsa-miR-455-3p	hsa-miR-1285-3p	hsa-miR-15a-3p	hsa-miR-4799-3p
chr4:106111517-106112092+	hsa-miR-6740-5p	hsa-miR-200c-5p	hsa-miR-4719	hsa-miR-6751-3p	hsa-miR-30c-1-3p
chr3:100034943-100039815+	hsa-miR-452-3p	hsa-miR-4778-3p	hsa-miR-6830-5p	hsa-miR-587	hsa-miR-3691-3p
chr2:53955849-53978078-	hsa-miR-4691-3p	hsa-miR-324-3p	hsa-miR-450b-3p	hsa-miR-4448	hsa-miR-221-5p
chr7:100279695-100279858-	hsa-miR-6842-3p	hsa-miR-361-3p	hsa-miR-3138	hsa-miR-4278	hsa-miR-6774-3p
chr3:185332352-185335399+	hsa-miR-514a-3p	hsa-miR-134-3p	hsa-miR-4322	hsa-miR-25-5p	hsa-miR-4785
chr5:61659005-61669664+	hsa-miR-4772-3p	hsa-miR-29b-1-5p	hsa-miR-106b-3p	hsa-miR-214-5p	hsa-miR-1260b
chr8:131130407-131138335-	hsa-miR-5000-5p	hsa-miR-3127-3p	hsa-miR-8075	hsa-miR-6861-5p	hsa-miR-3666
chr6:31322933-31323280-	hsa-miR-3184-5p	hsa-miR-1976	hsa-miR-6893-3p	hsa-miR-423-5p	hsa-miR-4646-5p
chr15:28996634-28996820+	hsa-miR-6806-3p	hsa-miR-5009-5p	hsa-miR-4326	hsa-miR-4323	hsa-miR-766-3p
chr7:134294865-134295016+	hsa-miR-4761-3p	hsa-miR-642b-3p	hsa-miR-642a-3p	hsa-miR-6076	hsa-miR-6797-3p
chr6:36467650-36475379-	hsa-miR-145-3p	hsa-miR-6825-5p	hsa-miR-515-3p	hsa-miR-1910-5p	hsa-miR-337-3p
chr18:18586312-18608896-	hsa-miR-5047	hsa-miR-20a-3p	hsa-miR-1301-3p	hsa-miR-613	hsa-miR-450b-5p
chr13:99171497-99171727-	hsa-miR-519d-5p	hsa-miR-6734-3p	hsa-miR-5002-5p	hsa-miR-512-5p	hsa-miR-6852-3p
chr14:56122760-56125332+	hsa-miR-4639-3p	hsa-miR-19a-5p	hsa-miR-3913-5p	hsa-miR-7158-5p	hsa-miR-4469
chr14:50287061-50300214-	hsa-miR-1908-3p	hsa-miR-5003-5p	hsa-miR-4632-3p	hsa-miR-4638-5p	hsa-miR-6892-3p
chr2:203921150-203949292+	hsa-miR-4727-5p	hsa-miR-4743-3p	hsa-miR-7974	hsa-miR-6888-3p	hsa-miR-4719
chr17:40476729-40477079-	hsa-miR-6880-5p	hsa-miR-4726-3p	hsa-miR-140-3p	hsa-miR-5089-5p	hsa-miR-6846-5p
chr12:64878083-64879797+	hsa-miR-3972	hsa-miR-6811-5p	hsa-miR-5581-5p	hsa-miR-1321	hsa-miR-621
chr5:80769519-80809536-	hsa-miR-432-5p	hsa-miR-625-5p	hsa-miR-4419b	hsa-miR-4700-3p	hsa-miR-4444
chr8:68018140-68028357+	hsa-miR-6770-5p	hsa-miR-4326	hsa-miR-3064-3p	hsa-miR-6756-5p	hsa-miR-4510
chr14:56611665-56645182+	hsa-miR-29b-3p	hsa-miR-29c-3p	hsa-miR-29a-3p	hsa-miR-4639-3p	hsa-miR-6817-5p
chr3:136323151-136342090-	hsa-miR-619-3p	hsa-miR-6089	hsa-miR-1202	hsa-miR-6846-3p	hsa-miR-6804-5p
chr15:63964695-63967292-	hsa-miR-4641	hsa-miR-155-3p	hsa-miR-1288-3p	hsa-miR-4530	hsa-miR-3929
chr11:71693853-71701763+	hsa-miR-874-5p	hsa-miR-6825-5p	hsa-miR-1273a	hsa-miR-922	hsa-miR-3173-3p
chr4:76580250-76581054-	hsa-miR-4279	hsa-miR-6830-3p	hsa-miR-494-5p	hsa-miR-24-3p	hsa-miR-3934-3p
chr6:149997396-150001593-	hsa-miR-660-5p	hsa-miR-361-3p	hsa-miR-2355-3p	hsa-miR-2467-3p	hsa-miR-4433b-5p
chr15:43346940-43352312-	hsa-miR-7705	hsa-miR-3691-5p	hsa-miR-324-5p	hsa-miR-224-5p	hsa-miR-2355-3p
chr1:21167349-21212864-	hsa-miR-7111-3p	hsa-miR-646	hsa-miR-4764-3p	hsa-miR-7113-3p	hsa-miR-6752-3p
chr5:132342451-132358598-	hsa-miR-6874-3p	hsa-miR-3160-5p	hsa-miR-4661-3p	hsa-miR-1226-5p	hsa-miR-3977
chr15:50592986-50601995-	hsa-miR-29b-3p	hsa-miR-152-5p	hsa-miR-3065-3p	hsa-miR-29c-3p	hsa-miR-29a-3p
chr9:19286767-19300329+	hsa-miR-765	hsa-miR-4513	hsa-miR-2278	hsa-miR-4715-5p	hsa-miR-6838-5p
chr3:53338207-53353500-	hsa-miR-3616-3p	hsa-miR-877-3p	hsa-miR-8081	hsa-miR-212-5p	hsa-miR-3652
chr21:43974172-43979199+	hsa-miR-6770-3p	hsa-miR-5587-3p	hsa-miR-4677-5p	hsa-miR-330-5p	hsa-miR-6777-5p
chr3:195057661-195063383-	hsa-miR-578	hsa-miR-219b-3p	hsa-miR-4721	hsa-miR-676-5p	hsa-miR-3192-3p
chr11:9451221-9452550+	hsa-miR-3126-3p	hsa-miR-599	hsa-miR-3974	hsa-miR-3611	hsa-miR-616-3p
chr8:101232507-101245765+	hsa-miR-3135b	hsa-miR-4707-3p	hsa-miR-6838-3p	hsa-miR-5704	hsa-miR-1248
chr1:76194086-76205795+	hsa-miR-1184	hsa-miR-152-5p	hsa-miR-7156-3p	hsa-miR-6794-5p	hsa-miR-487b-5p
chr1:90033806-90050348+	hsa-miR-3177-3p	hsa-miR-4654	hsa-miR-4769-5p	hsa-miR-4503	hsa-miR-876-5p
chr16:69402279-69406258-	hsa-miR-5706	hsa-miR-4330	hsa-miR-506-5p	hsa-miR-7843-3p	hsa-miR-6815-5p
chr5:31164136-31179245-	hsa-miR-625-5p	hsa-miR-3191-5p	hsa-miR-518c-5p	hsa-miR-1972	hsa-miR-1976
chr14:31771501-31771725-	hsa-miR-124-3p	hsa-miR-193b-3p	hsa-miR-506-3p	hsa-miR-361-3p	hsa-miR-1294
chr7:140476712-140487384-	hsa-miR-7160-5p	hsa-miR-6807-5p	hsa-miR-4763-3p	hsa-miR-4691-5p	hsa-miR-623
chr9:5021963-5055788+	hsa-miR-3622b-3p	hsa-miR-3622a-3p	hsa-miR-3180-5p	hsa-miR-424-5p	hsa-miR-34a-5p
chr4:84193240-84194770-	hsa-miR-500b-3p	hsa-miR-20b-3p	hsa-miR-4727-3p	hsa-miR-1229-5p	hsa-miR-4661-3p
chr2:2744228-2744407-	hsa-miR-4534	hsa-miR-765	hsa-miR-8082	hsa-miR-4695-5p	hsa-miR-4430
chr14:92264129-92268765-	hsa-miR-4793-3p	hsa-miR-708-3p	hsa-miR-212-5p	hsa-miR-1915-3p	hsa-miR-375
chr1:222897434-222898897-	hsa-miR-5006-5p	hsa-miR-4677-5p	hsa-miR-2116-5p	hsa-miR-4711-3p	hsa-miR-6778-3p
chr15:50866834-50867986-	hsa-miR-518c-5p	hsa-miR-2113	hsa-miR-579-3p	hsa-miR-4443	hsa-miR-4470
chr7:158672375-158698782+	hsa-miR-6783-3p	hsa-miR-939-3p	hsa-miR-378g	hsa-miR-520g-5p	hsa-miR-330-5p
chr3:160131261-160141628+	hsa-miR-676-5p	hsa-miR-152-3p	hsa-miR-6809-3p	hsa-miR-6868-3p	hsa-miR-6076
chr21:37619815-37620866+	hsa-miR-8081	hsa-miR-4660	hsa-miR-3154	hsa-miR-6849-5p	hsa-miR-6888-5p
chr1:23397718-23398690-	hsa-miR-150-3p	hsa-miR-106a-5p	hsa-miR-17-5p	hsa-miR-20a-5p	hsa-miR-20b-5p
chr5:88390776-88446594+	hsa-miR-4450	hsa-miR-6764-3p	hsa-miR-3191-5p	hsa-miR-4667-5p	hsa-miR-515-5p
chr12:112568315-112572870+	hsa-miR-6781-3p	hsa-miR-2682-3p	hsa-miR-7156-3p	hsa-miR-1184	hsa-miR-6819-3p
chr2:55481177-55489563-	hsa-miR-670-3p	hsa-miR-3189-3p	hsa-miR-6509-3p	hsa-miR-320b	hsa-miR-320a
chr11:64627396-64627808-	hsa-miR-6756-5p	hsa-miR-6727-5p	hsa-miR-3065-3p	hsa-miR-6766-5p	hsa-miR-4709-3p
chr17:27975162-28003903-	hsa-miR-4507	hsa-miR-1236-3p	hsa-miR-145-5p	hsa-miR-8060	hsa-miR-92a-1-5p
chr2:190670378-190682906+	hsa-miR-3150b-3p	hsa-miR-3927-3p	hsa-miR-4784	hsa-miR-129-5p	hsa-miR-582-5p
chr8:41543670-41548117-	hsa-miR-6865-5p	hsa-miR-5589-5p	hsa-miR-328-5p	hsa-miR-4708-3p	hsa-miR-6894-3p
chr1:40733458-40737707+	hsa-miR-4659b-3p	hsa-miR-4659a-3p	hsa-miR-4280	hsa-miR-520a-5p	hsa-miR-196a-3p
chr8:36474506-36474662+	hsa-miR-4272	hsa-miR-4728-3p	hsa-miR-3915	hsa-miR-7159-5p	hsa-miR-4742-5p
chr6:106649847-106665476-	hsa-miR-566	hsa-miR-198	hsa-miR-6809-5p	hsa-miR-6891-3p	hsa-miR-3180-5p
chr2:24033186-24056948-	hsa-miR-4709-3p	hsa-miR-4525	hsa-miR-635	hsa-miR-6802-3p	hsa-miR-15a-5p
chr12:109509417-109511337+	hsa-miR-7973	hsa-miR-627-5p	hsa-miR-6502-3p	hsa-miR-3174	hsa-miR-4736
chr7:48541722-48542148+	hsa-miR-7156-5p	hsa-miR-22-3p	hsa-miR-3160-5p	hsa-miR-4299	hsa-miR-6744-3p
chr8:142039032-142039204+	hsa-miR-1288-5p	hsa-miR-22-3p	hsa-miR-1236-3p	hsa-miR-558	hsa-miR-3184-3p
chr7:148718059-148722515-	hsa-miR-4639-3p	hsa-miR-6849-3p	hsa-miR-4284	hsa-miR-4472	hsa-miR-1273g-3p
chr5:167984428-167996003-	hsa-miR-1236-3p	hsa-miR-1303	hsa-miR-203b-5p	hsa-miR-4761-5p	hsa-miR-6893-5p
chr2:99858753-99858945+	hsa-miR-6756-5p	hsa-miR-6748-5p	hsa-miR-4640-5p	hsa-miR-4715-3p	hsa-miR-4726-5p
chr2:208841375-208842310-	hsa-miR-1200	hsa-miR-133a-5p	hsa-miR-3659	hsa-miR-4522	hsa-miR-5691
chr1:33097428-33099711-	hsa-miR-5197-3p	hsa-miR-6839-3p	hsa-miR-516b-3p	hsa-miR-516a-3p	hsa-miR-6792-3p
chr1:28337458-28343750-	hsa-miR-4256	hsa-miR-1182	hsa-miR-182-5p	hsa-miR-422a	hsa-miR-378h
chrX:24190832-24191840+	hsa-miR-652-3p	hsa-miR-658	hsa-miR-8057	hsa-miR-6849-3p	hsa-miR-6087
chr21:38746536-38747419+	hsa-miR-1273h-5p	hsa-miR-6780a-5p	hsa-miR-30b-3p	hsa-miR-6779-5p	hsa-miR-3689a-3p
chr9:125827627-125852664+	hsa-miR-3683	hsa-miR-195-5p	hsa-miR-6516-5p	hsa-miR-454-3p	hsa-miR-660-3p
chr8:141810558-141889736-	hsa-miR-6886-5p	hsa-miR-6812-3p	hsa-miR-4502	hsa-miR-6769b-5p	hsa-miR-6765-5p
chr16:66194605-66194772+	hsa-miR-106a-3p	hsa-miR-216b-3p	hsa-miR-4758-5p	hsa-miR-1301-5p	hsa-miR-337-3p
chr3:128875476-128875763-	hsa-miR-6807-5p	hsa-miR-34b-5p	hsa-miR-449c-5p	hsa-miR-2682-5p	hsa-miR-548au-3p
chr11:111907997-111914257+	hsa-miR-6721-5p	hsa-miR-4745-5p	hsa-miR-550b-2-5p	hsa-miR-3619-5p	hsa-miR-6866-3p
chr1:145592633-145595220-	hsa-miR-619-5p	hsa-miR-5095	hsa-miR-3152-5p	hsa-miR-4800-5p	hsa-miR-3150a-3p
chr11:13466571-13469892-	hsa-miR-4735-3p	hsa-miR-888-5p	hsa-miR-18b-5p	hsa-miR-18a-5p	hsa-miR-4633-5p
chr6:108242133-108246136-	hsa-miR-4537	hsa-miR-6499-5p	hsa-miR-619-5p	hsa-miR-7851-3p	hsa-miR-5095
chr5:30875282-30905693-	hsa-miR-4445-5p	hsa-miR-6892-5p	hsa-miR-4475	hsa-miR-4720-3p	hsa-miR-4682
chr20:47691322-47706283+	hsa-miR-1184	hsa-miR-3605-5p	hsa-miR-185-5p	hsa-miR-2278	hsa-miR-4753-5p
chr13:95686859-95724107-	hsa-miR-1200	hsa-miR-23b-3p	hsa-miR-23c	hsa-miR-23a-3p	hsa-miR-4724-3p
chr3:15045383-15055296+	hsa-miR-5001-5p	hsa-miR-6131	hsa-miR-7107-3p	hsa-miR-576-3p	hsa-miR-185-3p
chrX:48783123-48783326-	hsa-miR-663b	hsa-miR-615-3p	hsa-miR-6740-3p	hsa-miR-3653-5p	hsa-miR-7108-5p
chr2:61468695-61484485-	hsa-miR-215-3p	hsa-miR-6762-3p	hsa-miR-6875-3p	hsa-miR-567	hsa-miR-4747-5p
chr3:47719688-47721998-	hsa-miR-4309	hsa-miR-449c-3p	hsa-miR-3925-3p	hsa-miR-6751-5p	hsa-miR-3198
chr11:9435802-9438695+	hsa-miR-6801-5p	hsa-miR-6868-5p	hsa-miR-4494	hsa-miR-4782-5p	hsa-miR-4536-5p
chr12:19406874-19410471+	hsa-miR-3928-5p	hsa-miR-5088-5p	hsa-miR-6806-3p	hsa-miR-127-5p	hsa-miR-410-5p
chr2:15126788-15138348-	hsa-miR-6739-5p	hsa-miR-550a-5p	hsa-miR-204-3p	hsa-miR-5009-5p	hsa-miR-4432
chr1:150621144-150621703-	hsa-miR-127-5p	hsa-miR-670-3p	hsa-miR-450a-5p	hsa-miR-4501	hsa-miR-3929
chr1:48860939-48865316-	hsa-miR-6746-3p	hsa-miR-3162-5p	hsa-miR-19b-2-5p	hsa-miR-4726-5p	hsa-miR-365a-5p
chr2:68794477-68805135+	hsa-miR-1178-5p	hsa-miR-450a-2-3p	hsa-miR-3065-5p	hsa-miR-6887-3p	hsa-miR-193a-5p
chr17:73951647-73952028-	hsa-miR-323b-5p	hsa-miR-494-5p	hsa-miR-410-5p	hsa-miR-128-2-5p	hsa-let-7f-5p
chr4:100848874-100849774-	hsa-miR-1236-3p	hsa-miR-2355-5p	hsa-miR-135a-5p	hsa-miR-6807-5p	hsa-miR-135b-5p
chr3:136183723-136197217-	hsa-miR-1976	hsa-miR-6747-3p	hsa-miR-5691	hsa-miR-6805-3p	hsa-miR-504-3p
chr6:4891947-4892337+	hsa-miR-1180-3p	hsa-miR-3064-5p	hsa-miR-6504-5p	hsa-miR-3664-5p	hsa-miR-30c-1-3p
chr15:57523350-57565460+	hsa-miR-30b-3p	hsa-miR-6888-5p	hsa-miR-6894-5p	hsa-miR-7106-5p	hsa-miR-133a-5p
chr16:71808371-71822178-	hsa-miR-4707-3p	hsa-miR-425-5p	hsa-miR-7109-5p	hsa-miR-619-5p	hsa-miR-5095
chr5:129997577-129997735+	hsa-miR-548av-3p	hsa-miR-6832-3p	hsa-miR-5197-5p	hsa-miR-7152-5p	hsa-miR-4685-3p
chr18:21644104-21649235+	hsa-miR-6805-5p	hsa-miR-3180-3p	hsa-miR-4445-5p	hsa-miR-670-3p	hsa-miR-3180
chr14:66188493-66200099+	hsa-miR-210-3p	hsa-miR-542-5p	hsa-miR-548s	hsa-miR-1228-5p	hsa-miR-1287-3p
chr11:3988782-4045217+	hsa-miR-5581-3p	hsa-miR-873-5p	hsa-miR-3691-5p	hsa-miR-4752	hsa-miR-1288-3p
chr9:123924134-123928458+	hsa-miR-558	hsa-miR-6071	hsa-miR-432-5p	hsa-miR-3925-3p	hsa-miR-4686
chr15:63966541-63981898-	hsa-miR-5682	hsa-miR-4641	hsa-miR-23b-5p	hsa-miR-1288-3p	hsa-miR-4530
chr22:40749077-40750331+	hsa-miR-3529-5p	hsa-miR-6759-5p	hsa-miR-149-5p	hsa-miR-182-5p	hsa-miR-379-5p
chr1:21267984-21276604-	hsa-miR-765	hsa-miR-136-5p	hsa-miR-3925-3p	hsa-miR-4677-5p	hsa-miR-6726-5p
chr22:28943662-28946139-	hsa-miR-3617-5p	hsa-miR-6734-5p	hsa-miR-218-5p	hsa-miR-532-3p	hsa-miR-155-5p
chr18:47017996-47018203-	hsa-miR-141-5p	hsa-miR-4703-3p	hsa-miR-1245b-3p	hsa-miR-6832-3p	hsa-miR-204-5p
chr5:68881421-68882183+	hsa-miR-134-3p	hsa-miR-1296-3p	hsa-miR-181c-5p	hsa-miR-1343-5p	hsa-miR-548ao-3p
chr2:68592321-68621308+	hsa-miR-653-3p	hsa-miR-6755-3p	hsa-miR-1254	hsa-miR-7160-5p	hsa-miR-503-5p
chr15:67892985-67946360+	hsa-miR-514a-5p	hsa-miR-1273h-3p	hsa-miR-3688-3p	hsa-miR-4771	hsa-miR-6132
chr11:43465606-43465759+	hsa-miR-4640-5p	hsa-miR-4256	hsa-miR-6840-3p	hsa-miR-4726-5p	hsa-miR-3912-5p
chr10:74460651-74468114+	hsa-miR-203b-3p	hsa-miR-1273a	hsa-miR-1268b	hsa-miR-1268a	hsa-miR-1206
chr7:50799969-50823753-	hsa-miR-8057	hsa-miR-3187-5p	hsa-miR-6860	hsa-miR-6868-3p	hsa-miR-4751
chr7:33060884-33063720-	hsa-miR-181d-5p	hsa-miR-582-5p	hsa-miR-181b-5p	hsa-miR-6755-3p	hsa-miR-5006-3p
chr14:88476863-88477026-	hsa-miR-4662a-5p	hsa-miR-4717-3p	hsa-miR-4679	hsa-miR-5009-5p	hsa-miR-4675
chr12:104514178-104517201-	hsa-miR-6829-3p	hsa-miR-6832-3p	hsa-miR-466	hsa-miR-134-5p	hsa-miR-3680-5p
chr7:66236870-66264401+	hsa-miR-4454	hsa-miR-640	hsa-miR-1200	hsa-miR-212-5p	hsa-miR-6744-3p
chr3:182740205-182743592-	hsa-miR-3667-5p	hsa-miR-519c-3p	hsa-miR-890	hsa-miR-4790-5p	hsa-miR-519b-3p
chr2:50188811-50188980-	hsa-miR-6849-5p	hsa-miR-6507-3p	hsa-miR-3681-5p	hsa-miR-376c-5p	hsa-miR-376b-5p
chr22:39410308-39414050+	hsa-miR-4707-3p	hsa-miR-3665	hsa-miR-4690-5p	hsa-miR-5095	hsa-miR-4713-5p
chr11:61079256-61079556-	hsa-miR-187-3p	hsa-miR-8058	hsa-miR-432-5p	hsa-miR-5706	hsa-miR-1301-3p
chrM:4015-4168+	hsa-miR-1182	hsa-miR-193a-5p	hsa-miR-4270	hsa-miR-4739	hsa-miR-6754-5p
chr1:149931603-149936274-	hsa-miR-4738-5p	hsa-miR-148a-3p	hsa-miR-148b-3p	hsa-miR-152-3p	hsa-miR-7162-5p
chr16:58633140-58633415-	hsa-miR-6816-5p	hsa-miR-6504-5p	hsa-miR-3937	hsa-miR-4774-5p	hsa-miR-3196
chr2:201796062-201798697-	hsa-miR-4257	hsa-miR-3202	hsa-miR-6783-5p	hsa-miR-203b-3p	hsa-miR-3179
chr1:211952260-211966532+	hsa-miR-6844	hsa-miR-6780a-5p	hsa-miR-200b-5p	hsa-miR-6779-5p	hsa-miR-3659
chr2:74159725-74160637+	hsa-miR-4687-5p	hsa-miR-6797-5p	hsa-miR-1249-5p	hsa-miR-6791-3p	hsa-miR-6509-3p
chr12:10131565-10168326+	hsa-miR-6880-5p	hsa-miR-5189-3p	hsa-miR-4420	hsa-miR-6738-5p	hsa-miR-6853-5p
chr13:37614542-37625720-	hsa-miR-23c	hsa-miR-4266	hsa-miR-642a-3p	hsa-miR-499a-3p	hsa-miR-4719
chr2:234628786-234628945+	hsa-miR-4716-5p	hsa-miR-4323	hsa-miR-875-3p	hsa-miR-1224-3p	hsa-miR-1260a
chr17:72749499-72749662+	hsa-miR-18a-3p	hsa-miR-26b-3p	hsa-miR-10a-5p	hsa-miR-3157-3p	hsa-miR-6748-3p
chr16:18847255-18856973-	hsa-miR-4722-5p	hsa-miR-3918	hsa-miR-593-3p	hsa-miR-3194-3p	hsa-miR-1205
chr2:9658030-9663467-	hsa-miR-580-3p	hsa-miR-4742-3p	hsa-miR-6828-3p	hsa-miR-6502-5p	hsa-miR-6875-3p
chr4:110629611-110647761-	hsa-miR-181a-2-3p	hsa-miR-6892-3p	hsa-miR-3926	hsa-miR-6846-3p	hsa-miR-187-3p
chrX:17024344-17047746+	hsa-miR-6813-5p	hsa-miR-4706	hsa-miR-6765-5p	hsa-miR-130a-5p	hsa-miR-6891-3p
chr14:77812692-77818094-	hsa-miR-3922-5p	hsa-miR-6796-5p	hsa-miR-2861	hsa-miR-2114-3p	hsa-miR-6511b-5p
chr2:61492532-61493302-	hsa-miR-4660	hsa-miR-6846-3p	hsa-miR-18b-5p	hsa-miR-196a-3p	hsa-miR-18a-5p
chr8:17871473-17872349+	hsa-miR-6885-3p	hsa-miR-1302	hsa-miR-6851-5p	hsa-miR-6815-3p	hsa-miR-219a-1-3p
chr1:172177295-172181027+	hsa-miR-4802-5p	hsa-miR-1184	hsa-miR-544a	hsa-miR-6803-5p	hsa-miR-3619-5p
chr4:129873924-129965206-	hsa-miR-4727-5p	hsa-miR-548v	hsa-miR-7111-3p	hsa-miR-151a-3p	hsa-miR-6862-3p
chr12:39223181-39242464-	hsa-miR-6882-5p	hsa-miR-4259	hsa-miR-6873-3p	hsa-miR-4713-5p	hsa-miR-6833-3p
chr1:198190129-198233365+	hsa-miR-3657	hsa-miR-6881-3p	hsa-miR-504-5p	hsa-miR-758-5p	hsa-miR-617
chr19:10274002-10286294-	hsa-miR-4778-3p	hsa-miR-6870-3p	hsa-miR-618	hsa-miR-518c-5p	hsa-miR-6505-3p
chr12:112915455-112915819+	hsa-miR-769-3p	hsa-miR-29b-2-5p	hsa-miR-6511b-5p	hsa-miR-147a	hsa-miR-4325
chr12:123265711-123273476+	hsa-miR-7156-5p	hsa-miR-4259	hsa-miR-4761-3p	hsa-miR-4423-5p	hsa-miR-515-3p
chr3:183056588-183107567-	hsa-miR-6506-5p	hsa-miR-4700-5p	hsa-miR-660-3p	hsa-miR-8086	hsa-miR-4646-5p
chr10:89624211-89690846+	hsa-miR-6802-3p	hsa-miR-1296-5p	hsa-miR-1289	hsa-miR-628-5p	hsa-miR-7157-3p
chrX:117512565-117521377+	hsa-miR-504-3p	hsa-miR-500b-3p	hsa-miR-6747-3p	hsa-miR-1976	hsa-miR-3158-3p
chr5:75893264-75907008+	hsa-miR-6860	hsa-miR-3619-5p	hsa-miR-219a-1-3p	hsa-miR-4690-5p	hsa-miR-942-3p
chr3:121438493-121441225-	hsa-miR-3977	hsa-miR-4254	hsa-miR-6875-3p	hsa-miR-4637	hsa-miR-3194-3p
chr12:27116275-27117963+	hsa-miR-6806-3p	hsa-miR-3928-5p	hsa-miR-3651	hsa-miR-106a-3p	hsa-miR-4774-5p
chr17:36375100-36404528-	hsa-miR-1268b	hsa-miR-1268a	hsa-miR-6512-5p	hsa-miR-3672	hsa-miR-6859-3p
chr2:173349510-173362828+	hsa-miR-548v	hsa-miR-526b-5p	hsa-miR-515-3p	hsa-miR-2682-3p	hsa-miR-4507
chr21:34950605-34954361-	hsa-miR-492	hsa-miR-519d-5p	hsa-miR-4800-5p	hsa-miR-6511b-5p	hsa-miR-4424
chr7:4780469-4780654-	hsa-miR-1203	hsa-miR-6798-3p	hsa-miR-4529-5p	hsa-miR-361-3p	hsa-miR-3177-3p
chr5:88057002-88119744-	hsa-miR-7152-5p	hsa-miR-4741	hsa-miR-942-5p	hsa-miR-5187-3p	hsa-miR-6809-3p
chr1:176118142-176133027-	hsa-miR-3187-3p	hsa-miR-584-3p	hsa-miR-548s	hsa-miR-4703-3p	hsa-miR-20b-3p
chr14:35272060-35280242-	hsa-miR-363-5p	hsa-miR-1286	hsa-miR-532-5p	hsa-miR-6759-5p	hsa-miR-143-3p
chr17:27861136-27861318+	hsa-miR-2276-5p	hsa-miR-6893-3p	hsa-miR-370-3p	hsa-miR-1470	hsa-miR-550b-2-5p
chr11:82822155-82828239-	hsa-miR-6849-3p	hsa-miR-1273h-5p	hsa-miR-3156-3p	hsa-miR-6720-5p	hsa-miR-6512-3p
chr5:139889222-139889766+	hsa-miR-4680-5p	hsa-miR-1202	hsa-miR-4448	hsa-miR-4265	hsa-miR-7848-3p
chr7:156758964-156759786+	hsa-miR-4635	hsa-miR-1257	hsa-miR-605-3p	hsa-miR-3154	hsa-miR-4728-3p
chr5:89791516-89793523+	hsa-miR-4703-3p	hsa-miR-20b-3p	hsa-miR-1273g-3p	hsa-miR-1273a	hsa-miR-4472
chr5:80932376-80946158-	hsa-miR-3679-3p	hsa-miR-4456	hsa-miR-876-3p	hsa-miR-155-3p	hsa-miR-361-3p
chr4:113553086-113554398-	hsa-miR-6505-3p	hsa-miR-198	hsa-miR-3174	hsa-miR-3064-3p	hsa-miR-1245a
chr20:2945507-2996531+	hsa-miR-877-3p	hsa-miR-6878-3p	hsa-miR-31-5p	hsa-miR-6857-5p	hsa-miR-1250-5p
chr2:9658030-9683414-	hsa-miR-4703-3p	hsa-miR-3189-5p	hsa-miR-142-3p	hsa-miR-6828-3p	hsa-miR-6502-5p
chr12:133428204-133430159-	hsa-miR-324-5p	hsa-miR-4498	hsa-miR-5001-5p	hsa-miR-6825-5p	hsa-miR-572
chr19:18186559-18187137-	hsa-miR-212-5p	hsa-miR-6783-3p	hsa-miR-1343-3p	hsa-miR-6798-5p	hsa-miR-939-3p
chr6:154567725-154568622-	hsa-miR-6832-3p	hsa-miR-6846-3p	hsa-miR-5193	hsa-miR-4712-5p	hsa-miR-211-5p
chr15:49319562-49320879-	hsa-miR-6810-3p	hsa-miR-6801-3p	hsa-miR-6766-5p	hsa-miR-8052	hsa-miR-4653-5p
chr20:33934967-33971936-	hsa-miR-6863	hsa-miR-141-5p	hsa-miR-6503-3p	hsa-miR-26b-3p	hsa-miR-3918
chr10:112359412-112360888+	hsa-miR-3120-5p	hsa-miR-3074-5p	hsa-miR-4724-3p	hsa-miR-135a-5p	hsa-miR-135b-5p
chr15:50935537-50955243-	hsa-miR-496	hsa-miR-6516-5p	hsa-miR-3928-5p	hsa-miR-6502-3p	hsa-miR-628-5p
chr15:35219236-35231014-	hsa-miR-3912-5p	hsa-miR-4660	hsa-miR-1193	hsa-miR-6836-5p	hsa-miR-5706
chr13:73482669-73505405+	hsa-miR-767-5p	hsa-miR-5691	hsa-miR-145-5p	hsa-miR-4687-3p	hsa-miR-4480
chr12:57033764-57033976-	hsa-miR-6722-3p	hsa-miR-1909-3p	hsa-miR-4309	hsa-miR-4713-3p	hsa-miR-4661-3p
chr1:207850734-207851642+	hsa-miR-5000-5p	hsa-miR-8073	hsa-miR-769-3p	hsa-miR-4325	hsa-miR-1282
chr12:88509255-88510310-	hsa-miR-20a-3p	hsa-miR-6815-3p	hsa-miR-4743-3p	hsa-miR-3942-3p	hsa-miR-4475
chr9:124110293-124115580-	hsa-miR-196a-5p	hsa-miR-196b-5p	hsa-miR-5092	hsa-miR-4642	hsa-miR-4666b
chr19:39100236-39100665-	hsa-miR-4713-3p	hsa-miR-6798-5p	hsa-miR-6732-5p	hsa-miR-4268	hsa-miR-5196-3p
chr6:88385211-88391481-	hsa-miR-4784	hsa-miR-6740-3p	hsa-miR-3150b-3p	hsa-miR-619-5p	hsa-miR-5095
chr9:128103456-128109220+	hsa-miR-5001-5p	hsa-miR-762	hsa-miR-4492	hsa-miR-4498	hsa-miR-7107-3p
chr1:52289336-52299842-	hsa-miR-6748-5p	hsa-miR-6745	hsa-miR-5197-3p	hsa-miR-363-5p	hsa-miR-34c-3p
chr2:61721029-61722748-	hsa-miR-125a-5p	hsa-miR-6511a-5p	hsa-miR-138-1-3p	hsa-miR-4735-3p	hsa-miR-5739
chr7:100061217-100061652-	hsa-miR-4324	hsa-miR-6878-3p	hsa-miR-3667-3p	hsa-miR-423-5p	hsa-miR-500b-3p
chr7:77199777-77200503+	hsa-miR-6814-5p	hsa-miR-26b-3p	hsa-miR-629-3p	hsa-miR-6873-5p	hsa-miR-217
chr1:246743217-246755243+	hsa-miR-211-5p	hsa-miR-4493	hsa-miR-19b-2-5p	hsa-miR-3618	hsa-miR-19b-1-5p
chr2:27606819-27610025-	hsa-miR-877-3p	hsa-miR-5196-3p	hsa-miR-6760-3p	hsa-miR-5193	hsa-miR-3142
chr1:246490503-246493839-	hsa-miR-6865-5p	hsa-miR-6815-5p	hsa-miR-223-3p	hsa-miR-6893-5p	hsa-miR-3974
chr17:30267305-30315516+	hsa-miR-3688-5p	hsa-miR-6845-3p	hsa-miR-135b-5p	hsa-miR-135a-5p	hsa-miR-650
chr7:8043538-8047896+	hsa-miR-3618	hsa-miR-30b-5p	hsa-miR-30c-5p	hsa-miR-4639-5p	hsa-miR-30e-5p
chr7:8043538-8099878+	hsa-miR-640	hsa-miR-6865-3p	hsa-miR-4445-5p	hsa-miR-4693-5p	hsa-miR-96-5p
chr7:129756285-129762042-	hsa-miR-1912	hsa-miR-3138	hsa-miR-1295b-5p	hsa-miR-374c-3p	hsa-miR-6785-5p
chr17:16004564-16005071-	hsa-miR-383-3p	hsa-miR-6072	hsa-miR-6891-5p	hsa-miR-6797-5p	hsa-miR-5010-5p
chr6:34561729-34563725-	hsa-miR-5095	hsa-miR-5193	hsa-miR-4482-5p	hsa-miR-6813-5p	hsa-miR-100-3p
chr6:109466422-109477080+	hsa-miR-127-5p	hsa-miR-3620-5p	hsa-miR-1587	hsa-miR-4760-5p	hsa-miR-6776-5p
chr6:144835045-144844324+	hsa-miR-4766-3p	hsa-miR-5586-5p	hsa-miR-548aj-5p	hsa-miR-548x-5p	hsa-miR-548g-5p
chr9:26616038-26616206-	hsa-miR-4681	hsa-miR-6750-3p	hsa-miR-6739-5p	hsa-miR-6733-5p	hsa-miR-3153
chr15:23333849-23339028-	hsa-miR-4710	hsa-miR-3202	hsa-miR-4257	hsa-miR-193a-3p	hsa-miR-3612
chr12:51689580-51693498-	hsa-miR-6878-3p	hsa-miR-613	hsa-miR-1244	hsa-miR-4524b-5p	hsa-miR-6736-3p
chr7:73654268-73663448-	hsa-miR-8052	hsa-miR-6724-5p	hsa-miR-6773-5p	hsa-miR-4292	hsa-miR-597-3p
chr12:88513891-88524995-	hsa-miR-2117	hsa-miR-501-5p	hsa-miR-519e-3p	hsa-miR-4793-3p	hsa-miR-5002-5p
chr17:41108221-41109212-	hsa-miR-3194-3p	hsa-miR-29a-5p	hsa-miR-6773-5p	hsa-miR-6732-5p	hsa-miR-484
chr9:20819795-20867011+	hsa-miR-4476	hsa-miR-10b-5p	hsa-miR-4703-3p	hsa-miR-329-3p	hsa-miR-4666a-3p
chr1:94924163-94941293+	hsa-miR-6826-3p	hsa-miR-624-5p	hsa-miR-3657	hsa-miR-649	hsa-miR-499a-3p
chr17:7849046-7849304+	hsa-miR-3127-5p	hsa-miR-3944-3p	hsa-miR-3184-5p	hsa-miR-423-5p	hsa-miR-3918
chr7:72604106-72605594+	hsa-miR-1236-3p	hsa-miR-4436b-5p	hsa-miR-4440	hsa-miR-5581-5p	hsa-miR-6768-5p
chr17:15391202-15391648-	hsa-miR-1273g-3p	hsa-miR-6826-3p	hsa-miR-450a-2-3p	hsa-miR-6749-3p	hsa-miR-6887-3p
chr6:20480077-20483232+	hsa-miR-4522	hsa-miR-3944-5p	hsa-miR-619-3p	hsa-miR-1268b	hsa-miR-6749-3p
chr3:15849160-15855816-	hsa-miR-144-5p	hsa-miR-1285-3p	hsa-miR-5695	hsa-miR-6760-5p	hsa-miR-33b-3p
chr14:35233913-35234139-	hsa-miR-5196-3p	hsa-miR-5687	hsa-miR-412-5p	hsa-miR-1306-5p	hsa-miR-6785-3p
chr4:120189423-120190992+	hsa-miR-3611	hsa-miR-6873-3p	hsa-miR-6833-3p	hsa-miR-29a-5p	hsa-miR-4768-5p
chr11:118352430-118353210+	hsa-miR-6774-5p	hsa-miR-6865-5p	hsa-miR-6876-3p	hsa-miR-6762-3p	hsa-miR-450a-1-3p
chr5:85996187-85996374+	hsa-miR-218-5p	hsa-miR-6750-3p	hsa-miR-3200-3p	hsa-miR-4753-3p	hsa-miR-4432
chr7:25191215-25198149-	hsa-miR-4659a-3p	hsa-miR-1273h-5p	hsa-miR-1267	hsa-miR-4659b-3p	hsa-miR-631
chr7:112098916-112102433+	hsa-miR-6837-3p	hsa-miR-3606-5p	hsa-miR-5000-5p	hsa-miR-4685-5p	hsa-miR-3918
chr1:94685814-94697199-	hsa-miR-132-3p	hsa-miR-6081	hsa-miR-1184	hsa-miR-135b-5p	hsa-miR-135a-5p
chr1:176085760-176118210-	hsa-miR-6873-3p	hsa-miR-4534	hsa-miR-708-5p	hsa-miR-1304-5p	hsa-miR-490-3p
chr6:109689382-109700865-	hsa-miR-4739	hsa-miR-1321	hsa-miR-4756-5p	hsa-miR-4438	hsa-miR-5698
chr4:39322003-39329376-	hsa-miR-7161-3p	hsa-miR-766-3p	hsa-miR-584-3p	hsa-miR-1304-5p	hsa-miR-6788-5p
chr3:175599627-175599810-	hsa-miR-3973	hsa-miR-6507-5p	hsa-miR-518c-5p	hsa-miR-223-5p	hsa-miR-3191-5p
chr15:65471272-65472560-	hsa-miR-7978	hsa-miR-4676-5p	hsa-miR-6831-5p	hsa-miR-101-3p	hsa-miR-6165
chr1:172525009-172539870+	hsa-miR-5706	hsa-miR-4513	hsa-miR-135b-3p	hsa-miR-4782-5p	hsa-miR-3913-5p
chr17:36375100-36398302-	hsa-miR-1537-5p	hsa-miR-6733-5p	hsa-miR-3617-3p	hsa-miR-548q	hsa-miR-1237-3p
chr4:119026173-119064839+	hsa-miR-376b-5p	hsa-miR-376c-5p	hsa-miR-6762-5p	hsa-miR-3184-5p	hsa-miR-4446-5p
chr21:16363522-16415895+	hsa-miR-6885-5p	hsa-miR-328-5p	hsa-miR-558	hsa-miR-2467-3p	hsa-miR-5188
chr15:43164809-43170882-	hsa-miR-4295	hsa-miR-4773	hsa-miR-4286	hsa-miR-3943	hsa-miR-7855-5p
chr16:74949768-74950157-	hsa-miR-3158-3p	hsa-miR-4772-5p	hsa-miR-3074-5p	hsa-miR-138-5p	hsa-miR-6749-3p
chr5:95099212-95103870+	hsa-miR-5700	hsa-miR-586	hsa-miR-510-3p	hsa-miR-497-3p	hsa-miR-329-5p
chr14:39620950-39627606-	hsa-miR-4782-3p	hsa-miR-4502	hsa-miR-2355-3p	hsa-miR-433-3p	hsa-miR-449b-3p
chr2:68717322-68742868+	hsa-miR-4643	hsa-miR-4423-3p	hsa-miR-6796-5p	hsa-miR-155-3p	hsa-miR-4765
chr17:18574180-18575615-	hsa-miR-138-5p	hsa-miR-4649-5p	hsa-miR-3177-3p	hsa-miR-6882-3p	hsa-miR-939-5p
chr22:38894090-38897285-	hsa-miR-6511b-5p	hsa-miR-371a-5p	hsa-miR-5089-3p	hsa-miR-3150a-3p	hsa-miR-93-5p
chr10:11317020-11356233+	hsa-miR-4721	hsa-miR-33b-5p	hsa-miR-6764-5p	hsa-miR-1915-3p	hsa-miR-3678-3p
chr1:6931817-6959079+	hsa-miR-6742-3p	hsa-miR-328-5p	hsa-miR-548az-3p	hsa-miR-1268a	hsa-miR-1268b
chr2:45671401-45704214-	hsa-miR-1248	hsa-miR-4715-3p	hsa-miR-3167	hsa-miR-660-3p	hsa-miR-184
chr19:57967021-57967550+	hsa-miR-4778-3p	hsa-miR-3129-5p	hsa-miR-548p	hsa-miR-29a-3p	hsa-miR-541-3p
chr8:109482055-109498828+	hsa-miR-6734-5p	hsa-miR-4778-5p	hsa-miR-223-5p	hsa-miR-218-2-3p	hsa-miR-6878-3p
chr15:91136868-91147679+	hsa-miR-6762-3p	hsa-miR-6744-3p	hsa-miR-4651	hsa-miR-6752-5p	hsa-miR-6726-3p
chr3:52685758-52713742-	hsa-miR-5787	hsa-miR-6774-5p	hsa-miR-1268a	hsa-miR-1268b	hsa-miR-4750-3p
chr11:128467193-128467552-	hsa-miR-877-3p	hsa-miR-632	hsa-miR-6739-3p	hsa-miR-7978	hsa-miR-138-5p
chr3:137928659-137964025+	hsa-miR-8089	hsa-miR-4667-5p	hsa-miR-4700-5p	hsa-miR-6736-3p	hsa-miR-6845-3p
chr12:133624541-133625434+	hsa-miR-1262	hsa-miR-29b-1-5p	hsa-miR-6761-5p	hsa-miR-6741-3p	hsa-miR-4713-3p
chr18:36053770-36053925+	hsa-miR-3189-3p	hsa-miR-1237-3p	hsa-miR-610	hsa-miR-6886-3p	hsa-miR-1910-5p
chr17:64509454-64510841+	hsa-miR-1228-3p	hsa-miR-1288-3p	hsa-miR-586	hsa-miR-558	hsa-miR-942-3p
chr17:7754648-7754867+	hsa-miR-6876-3p	hsa-miR-23b-5p	hsa-miR-1914-3p	hsa-miR-23a-5p	hsa-miR-5194
chr15:22840244-22842183+	hsa-miR-141-5p	hsa-miR-5195-3p	hsa-miR-6881-3p	hsa-miR-145-5p	hsa-miR-877-3p
chr11:120318583-120330029+	hsa-miR-6804-5p	hsa-miR-5008-5p	hsa-miR-515-5p	hsa-miR-615-5p	hsa-miR-5706
chr17:79532531-79539114-	hsa-miR-6826-5p	hsa-miR-128-1-5p	hsa-miR-4268	hsa-miR-6865-5p	hsa-miR-2467-3p
chr3:136162129-136170989-	hsa-miR-6826-3p	hsa-miR-22-5p	hsa-miR-6887-3p	hsa-miR-3944-3p	hsa-miR-4666b
chr4:48191039-48200309-	hsa-miR-554	hsa-miR-1972	hsa-miR-4290	hsa-miR-6871-3p	hsa-miR-939-5p
chr2:33477744-33488459+	hsa-miR-1254	hsa-miR-3116	hsa-miR-3918	hsa-miR-6842-3p	hsa-miR-4705
chr7:155457869-155471378+	hsa-miR-515-5p	hsa-miR-6760-3p	hsa-miR-548f-5p	hsa-miR-6072	hsa-miR-5695
chr16:354304-364683-	hsa-miR-4640-5p	hsa-miR-1306-3p	hsa-miR-6762-5p	hsa-miR-1976	hsa-miR-6845-5p
chr22:46096162-46136418+	hsa-miR-501-3p	hsa-miR-502-3p	hsa-miR-3925-3p	hsa-miR-1825	hsa-miR-4696
chr5:66094362-66121584+	hsa-miR-4716-3p	hsa-miR-6794-5p	hsa-miR-625-5p	hsa-miR-6867-5p	hsa-miR-1273a
chr9:108241635-108246783+	hsa-miR-29b-2-5p	hsa-miR-4484	hsa-miR-6755-3p	hsa-miR-937-5p	hsa-miR-7843-3p
chr2:25458576-25459874-	hsa-miR-4524b-3p	hsa-miR-767-5p	hsa-miR-3663-5p	hsa-miR-1976	hsa-miR-4660
chr12:936208-936428+	hsa-miR-3136-5p	hsa-miR-598-5p	hsa-miR-6781-5p	hsa-miR-656-5p	hsa-miR-6755-3p
chr4:2954002-2955372-	hsa-miR-3121-5p	hsa-miR-5001-3p	hsa-miR-26b-3p	hsa-miR-4298	hsa-miR-1976
chr4:74167981-74172898+	hsa-miR-6511b-5p	hsa-miR-1910-3p	hsa-miR-2117	hsa-miR-4693-5p	hsa-miR-4772-5p
chr16:87788800-87795642-	hsa-miR-6756-5p	hsa-miR-1178-3p	hsa-miR-668-5p	hsa-miR-7855-5p	hsa-miR-597-5p
chr7:72685539-72694143-	hsa-miR-1273g-3p	hsa-miR-6499-3p	hsa-miR-614	hsa-miR-1285-5p	hsa-miR-7851-3p
chr10:70098260-70099312+	hsa-miR-6736-3p	hsa-miR-103b	hsa-miR-215-3p	hsa-miR-6884-3p	hsa-miR-4668-3p
chr20:3925824-3944671-	hsa-miR-1299	hsa-miR-497-3p	hsa-miR-6806-5p	hsa-miR-4753-3p	hsa-miR-1910-3p
chr17:56772292-56787351+	hsa-miR-6792-3p	hsa-miR-4691-5p	hsa-miR-6511b-5p	hsa-miR-3678-3p	hsa-miR-6727-3p
chr3:63819739-63825449-	hsa-miR-340-3p	hsa-miR-1343-3p	hsa-miR-6827-3p	hsa-miR-654-5p	hsa-miR-4261
chr2:218700034-218700204-	hsa-miR-4712-5p	hsa-miR-185-5p	hsa-miR-4469	hsa-miR-7106-3p	hsa-miR-4306
chr11:63517463-63517670+	hsa-miR-4538	hsa-miR-1255a	hsa-miR-7113-5p	hsa-miR-1255b-5p	hsa-miR-22-3p
chr10:35302627-35320547-	hsa-miR-544a	hsa-miR-6806-3p	hsa-miR-6825-3p	hsa-miR-3928-5p	hsa-miR-133a-5p
chr8:104412693-104417089-	hsa-miR-510-5p	hsa-miR-377-3p	hsa-miR-1273a	hsa-miR-6780a-5p	hsa-miR-3938
chr9:80567242-80614244-	hsa-miR-1273g-3p	hsa-miR-6508-3p	hsa-miR-141-5p	hsa-miR-3617-3p	hsa-miR-1285-3p
chr19:58287911-58301768+	hsa-miR-7113-5p	hsa-miR-2114-3p	hsa-miR-338-3p	hsa-miR-370-5p	hsa-miR-766-3p
chrX:11381572-11388625-	hsa-miR-4714-3p	hsa-miR-6791-5p	hsa-miR-4292	hsa-miR-6503-5p	hsa-miR-5589-3p
chr4:77887221-77952123+	hsa-miR-7160-3p	hsa-miR-4634	hsa-miR-4778-3p	hsa-miR-4755-3p	hsa-miR-552-3p
chr18:9182380-9239554+	hsa-miR-450a-2-3p	hsa-miR-4509	hsa-miR-296-3p	hsa-miR-7109-5p	hsa-miR-642a-5p
chr1:220191791-220203822-	hsa-miR-767-3p	hsa-miR-424-5p	hsa-miR-3127-5p	hsa-miR-1266-5p	hsa-miR-5195-3p
chr17:62130140-62130731+	hsa-miR-5196-3p	hsa-miR-6858-5p	hsa-miR-6872-3p	hsa-miR-3922-5p	hsa-miR-663b
chr15:50303042-50339661-	hsa-miR-1299	hsa-miR-101-5p	hsa-miR-3173-3p	hsa-miR-576-5p	hsa-miR-31-5p
chr15:50754477-50757388+	hsa-miR-6772-3p	hsa-miR-873-5p	hsa-miR-4448	hsa-miR-6815-3p	hsa-miR-3121-5p
chr13:51509021-51544397+	hsa-miR-1827	hsa-miR-6878-3p	hsa-miR-130a-3p	hsa-miR-1247-5p	hsa-miR-146b-3p
chr15:66048478-66053776-	hsa-miR-3188	hsa-miR-141-5p	hsa-miR-187-5p	hsa-miR-4768-5p	hsa-miR-617
chr3:160021703-160099506-	hsa-miR-6509-3p	hsa-miR-1273g-3p	hsa-miR-4758-3p	hsa-miR-5195-3p	hsa-miR-922
chr17:65574302-65628354+	hsa-miR-2355-3p	hsa-miR-7110-3p	hsa-miR-1-5p	hsa-miR-29b-2-5p	hsa-miR-6873-3p
chr2:109345588-109357137+	hsa-miR-6769b-3p	hsa-miR-4684-5p	hsa-miR-628-5p	hsa-miR-544a	hsa-miR-7156-3p
chr22:32272143-32275738+	hsa-miR-4685-5p	hsa-miR-759	hsa-miR-4717-5p	hsa-miR-3064-3p	hsa-miR-6837-5p
chr8:68015272-68066371+	hsa-miR-324-5p	hsa-miR-6868-3p	hsa-miR-125b-5p	hsa-miR-125a-5p	hsa-miR-4319
chr2:135957978-135960533-	hsa-miR-4666b	hsa-miR-4435	hsa-miR-6884-5p	hsa-miR-548q	hsa-miR-3151-3p
chr14:97299804-97313681+	hsa-miR-18a-5p	hsa-miR-18b-5p	hsa-miR-7112-3p	hsa-miR-4660	hsa-miR-6791-3p
chr9:140646783-140657272+	hsa-miR-7113-5p	hsa-miR-3611	hsa-miR-6880-3p	hsa-miR-4270	hsa-miR-1289
chr17:9395146-9408479-	hsa-miR-877-5p	hsa-miR-6859-5p	hsa-miR-3907	hsa-miR-3663-5p	hsa-miR-3189-5p
chr7:139425820-139462488-	hsa-miR-504-5p	hsa-miR-486-3p	hsa-miR-4664-5p	hsa-miR-4725-5p	hsa-miR-342-5p
chr17:30807164-30807649+	hsa-miR-219a-2-3p	hsa-miR-331-3p	hsa-miR-6873-5p	hsa-miR-6847-3p	hsa-miR-5000-3p
chrM:2406-2561+	hsa-miR-3937	hsa-miR-552-5p	hsa-miR-6787-5p	hsa-miR-4299	hsa-miR-4746-3p
chr17:42231924-42232779+	hsa-miR-4500	hsa-miR-1914-5p	hsa-miR-4675	hsa-let-7i-5p	hsa-miR-98-5p
chr9:79702493-79702644+	hsa-miR-3173-3p	hsa-miR-345-5p	hsa-miR-6891-5p	hsa-miR-4264	hsa-miR-6809-5p
chr3:37376544-37381690+	hsa-miR-4680-5p	hsa-miR-146a-3p	hsa-miR-4317	hsa-miR-1205	hsa-miR-181b-2-3p
chr14:74358730-74363237+	hsa-miR-649	hsa-miR-7161-3p	hsa-miR-520d-3p	hsa-miR-4779	hsa-miR-520a-3p
chr3:112260650-112269109-	hsa-miR-4778-3p	hsa-miR-7843-3p	hsa-miR-2355-3p	hsa-miR-409-5p	hsa-miR-3689f
chr17:80521230-80521424+	hsa-miR-149-3p	hsa-miR-4649-5p	hsa-miR-34c-5p	hsa-miR-6508-3p	hsa-miR-449b-5p
chr15:59139496-59144164+	hsa-miR-6884-3p	hsa-miR-3194-3p	hsa-miR-2355-3p	hsa-miR-449c-3p	hsa-miR-5590-5p
chr7:151851596-151852621-	hsa-miR-3065-3p	hsa-miR-1911-3p	hsa-miR-6878-5p	hsa-miR-4668-5p	hsa-miR-612
chr6:108798068-108798495+	hsa-miR-362-5p	hsa-miR-143-5p	hsa-miR-6841-3p	hsa-miR-601	hsa-miR-6070
chr2:201800422-201802689-	hsa-miR-3160-3p	hsa-miR-28-5p	hsa-miR-1914-5p	hsa-miR-769-5p	hsa-miR-6807-3p
chr1:66081691-66088664+	hsa-miR-9-5p	hsa-miR-3916	hsa-miR-29b-3p	hsa-miR-548u	hsa-miR-636
chr11:36400931-36415918+	hsa-miR-3152-5p	hsa-miR-3619-5p	hsa-miR-4443	hsa-miR-1268b	hsa-miR-1268a
chr14:75247108-75249028+	hsa-miR-92a-2-5p	hsa-miR-1291	hsa-miR-6805-5p	hsa-miR-6865-5p	hsa-miR-185-3p
chr19:8618023-8618321-	hsa-miR-4641	hsa-miR-1205	hsa-miR-1269b	hsa-miR-1269a	hsa-miR-659-5p
chr1:246899277-246907427+	hsa-miR-892b	hsa-miR-149-5p	hsa-miR-3692-5p	hsa-miR-4774-5p	hsa-miR-624-5p
chr2:48692076-48692781+	hsa-miR-6814-3p	hsa-miR-4763-5p	hsa-miR-6780a-3p	hsa-miR-6837-5p	hsa-miR-1270
chr21:34804484-34805178+	hsa-miR-122-5p	hsa-miR-378c	hsa-miR-378b	hsa-miR-378a-3p	hsa-miR-4722-3p
chr16:70575572-70578436+	hsa-miR-30c-2-3p	hsa-miR-30c-1-3p	hsa-miR-8085	hsa-miR-4756-3p	hsa-miR-1248
chr2:197653928-197657876-	hsa-miR-5193	hsa-miR-877-3p	hsa-miR-769-5p	hsa-miR-6828-5p	hsa-miR-6881-3p
chr5:154245002-154247352+	hsa-miR-1245b-3p	hsa-miR-424-5p	hsa-miR-662	hsa-miR-1273g-3p	hsa-miR-504-3p
chr14:92126181-92195823-	hsa-miR-378a-5p	hsa-miR-770-5p	hsa-miR-3134	hsa-miR-3171	hsa-miR-1252-5p
chr9:35704514-35704665-	hsa-miR-4656	hsa-miR-3192-5p	hsa-miR-762	hsa-miR-5001-5p	hsa-miR-765
chr8:62563609-62566219-	hsa-miR-4302	hsa-miR-4677-5p	hsa-miR-3977	hsa-miR-3944-3p	hsa-miR-4516
chr3:93659735-93659948-	hsa-miR-6792-3p	hsa-miR-1273g-3p	hsa-miR-6865-3p	hsa-miR-6509-3p	hsa-miR-19b-2-5p
chr2:202625604-202626541-	hsa-miR-4747-5p	hsa-miR-5196-5p	hsa-miR-423-5p	hsa-miR-5001-5p	hsa-miR-4685-5p
chr3:58351601-58355205+	hsa-miR-4727-5p	hsa-miR-3972	hsa-miR-1202	hsa-miR-3692-3p
chr12:97204453-97204618+	hsa-miR-4733-3p	hsa-miR-3192-5p	hsa-miR-6499-3p	hsa-miR-4632-5p	hsa-miR-1226-5p
chr14:21968637-21970045-	hsa-miR-6503-5p	hsa-miR-6764-5p	hsa-miR-596	hsa-miR-4793-3p	hsa-miR-6724-5p
chr6:86351010-86351169-	hsa-miR-509-3-5p	hsa-miR-338-3p	hsa-miR-509-5p	hsa-miR-624-5p	hsa-miR-3158-5p
chr17:27816682-27818883+	hsa-miR-516b-5p	hsa-miR-124-3p	hsa-miR-650	hsa-miR-31-5p	hsa-miR-6502-3p
chr1:90033806-90034052+	hsa-miR-4474-5p	hsa-miR-4311
chr8:100108540-100133673+	hsa-miR-4661-3p	hsa-miR-4679	hsa-miR-26a-1-3p	hsa-miR-26a-2-3p	hsa-miR-647
chr13:21955573-21957148-	hsa-miR-6736-3p	hsa-miR-4799-3p	hsa-miR-766-3p	hsa-miR-4720-5p	hsa-miR-29b-1-5p
chr4:17910717-17974508-	hsa-miR-27a-3p	hsa-miR-27b-3p	hsa-miR-133a-3p	hsa-miR-133b	hsa-miR-6824-5p
chr7:20259708-20298183-	hsa-miR-1268b	hsa-miR-1268a	hsa-miR-3116	hsa-miR-28-5p	hsa-miR-1271-3p
chr4:36230204-36231267-	hsa-miR-892b	hsa-miR-212-3p	hsa-miR-383-5p	hsa-miR-448	hsa-miR-6815-3p
chr15:44907561-44949461-	hsa-miR-708-5p	hsa-miR-4723-5p	hsa-miR-7111-5p	hsa-miR-6827-5p	hsa-miR-6870-5p
chrX:122747903-122756711-	hsa-miR-6873-3p	hsa-miR-130b-5p	hsa-miR-204-5p	hsa-miR-211-5p	hsa-miR-3191-5p
chr1:235582788-235594119+	hsa-miR-4724-5p	hsa-miR-6719-3p	hsa-miR-634	hsa-miR-5195-3p	hsa-miR-181b-2-3p
chr10:32832228-32924086+	hsa-miR-6745	hsa-miR-369-5p	hsa-miR-711	hsa-miR-4645-5p	hsa-miR-4742-5p
chr1:172520652-172560211+	hsa-miR-345-5p	hsa-miR-6892-3p	hsa-miR-493-5p	hsa-miR-3913-5p	hsa-miR-4512
chr5:61669514-61677080+	hsa-miR-29b-1-5p	hsa-miR-146b-3p	hsa-miR-3913-3p	hsa-miR-4778-3p	hsa-miR-4653-5p
chrM:4384-5369+	hsa-miR-6848-5p	hsa-miR-6846-5p	hsa-miR-6894-3p	hsa-miR-3162-5p	hsa-miR-1244
chr4:42580277-42590346-	hsa-miR-223-5p	hsa-miR-6072	hsa-miR-549a	hsa-miR-199b-5p	hsa-miR-889-5p
chr13:95686859-95735544-	hsa-miR-3616-3p	hsa-miR-1200	hsa-miR-4724-3p	hsa-miR-1227-5p	hsa-miR-3655
chr10:104899163-104934739-	hsa-miR-4686	hsa-miR-4761-3p	hsa-miR-665	hsa-miR-4690-5p	hsa-miR-6862-5p
chr18:59780367-59830889-	hsa-miR-203b-3p	hsa-miR-3135b	hsa-miR-4477b	hsa-miR-4695-5p	hsa-miR-6801-5p
chr17:60598134-60642498+	hsa-miR-942-5p	hsa-miR-1248	hsa-miR-26a-2-3p	hsa-miR-515-3p	hsa-miR-3120-5p
chrM:14068-14413-	hsa-miR-7111-3p	hsa-miR-3679-3p	hsa-miR-6732-3p	hsa-miR-4723-3p	hsa-miR-155-3p
chr1:86578250-86611866-	hsa-miR-328-3p	hsa-miR-3152-5p	hsa-miR-1228-5p	hsa-miR-6861-3p	hsa-miR-3190-3p
chrM:5054-5349+	hsa-miR-3162-5p	hsa-miR-1244	hsa-miR-6891-5p	hsa-miR-6869-5p	hsa-miR-92a-2-5p
chr21:17264959-17265124+	hsa-miR-212-5p	hsa-miR-6886-3p	hsa-miR-8075	hsa-miR-4502	hsa-miR-3160-3p
chr7:618893-647089-	hsa-miR-3938	hsa-miR-4787-3p	hsa-miR-132-3p	hsa-miR-6879-3p	hsa-miR-212-3p
chr1:63003562-63018572-	hsa-miR-6880-5p	hsa-miR-1289	hsa-miR-4299	hsa-miR-1205	hsa-miR-1273g-3p
chr21:40762624-40763762+	hsa-miR-4720-5p	hsa-miR-221-5p	hsa-miR-27b-5p	hsa-miR-660-5p	hsa-miR-6720-5p
chr10:71151881-71154861+	hsa-miR-188-5p	hsa-miR-6887-3p	hsa-miR-6782-3p	hsa-miR-324-3p	hsa-miR-144-5p
chr5:61659005-61659726+	hsa-miR-4772-3p	hsa-miR-106b-3p	hsa-miR-214-5p	hsa-miR-1260b	hsa-miR-6736-3p
chr16:81888049-81904540+	hsa-miR-4663	hsa-miR-498	hsa-miR-96-5p	hsa-miR-3160-5p	hsa-miR-4477b
chr22:28290543-28293880-	hsa-miR-8076	hsa-miR-139-5p	hsa-miR-7849-3p	hsa-miR-4659a-5p	hsa-miR-29b-1-5p
chr7:138954140-138957186+	hsa-miR-597-3p	hsa-miR-4774-5p	hsa-miR-660-3p	hsa-miR-3678-3p	hsa-miR-1233-5p
chr2:32855590-32859072+	hsa-miR-1245b-3p	hsa-miR-135a-5p	hsa-miR-8081	hsa-miR-767-3p	hsa-miR-1267
chr4:156617908-156629446+	hsa-miR-1251-3p	hsa-miR-567	hsa-miR-4513	hsa-miR-6893-3p	hsa-miR-6740-3p
chr16:11940358-11944275-	hsa-miR-4743-3p	hsa-miR-378c	hsa-miR-6797-5p	hsa-miR-5588-5p	hsa-miR-4433a-3p
chr3:133293883-133305566+	hsa-miR-4778-3p	hsa-miR-323a-5p	hsa-miR-6851-5p	hsa-miR-3170	hsa-miR-619-3p
chr16:19627436-19663412+	hsa-miR-3690	hsa-miR-6862-5p	hsa-miR-1538	hsa-miR-1301-3p	hsa-miR-192-3p
chr13:25839957-25848325-	hsa-miR-330-5p	hsa-miR-326	hsa-miR-3191-5p	hsa-miR-6740-5p	hsa-miR-96-5p
chr17:3745810-3746445-	hsa-miR-5095	hsa-miR-504-3p	hsa-miR-5699-3p	hsa-miR-548s	hsa-miR-4259
chrX:11196220-11204405-	hsa-miR-6755-3p	hsa-miR-6867-5p	hsa-miR-6507-3p	hsa-miR-4290	hsa-miR-6804-5p
chr19:45766371-45769539+	hsa-miR-6737-5p	hsa-miR-4733-3p	hsa-miR-4651	hsa-miR-608	hsa-miR-6811-5p
chr22:28269726-28310335-	hsa-miR-211-5p	hsa-miR-6744-3p	hsa-miR-186-3p	hsa-miR-6832-3p	hsa-miR-8076
chr10:74460651-74475660+	hsa-miR-98-5p	hsa-let-7c-5p	hsa-let-7b-5p	hsa-let-7a-5p	hsa-let-7f-5p
chr11:77823696-77832220-	hsa-miR-711	hsa-miR-3927-3p	hsa-miR-3922-5p	hsa-miR-6076	hsa-miR-6831-5p
chr7:158662546-158664253+	hsa-miR-6873-3p	hsa-miR-4446-5p	hsa-miR-6776-3p	hsa-miR-7111-3p	hsa-miR-611
chr9:20886236-20889871+	hsa-miR-34a-3p	hsa-miR-3191-3p	hsa-miR-545-3p	hsa-miR-5700	hsa-miR-33b-3p
chr3:24231565-24270492-	hsa-miR-198	hsa-miR-887-5p	hsa-miR-4425	hsa-miR-8086	hsa-miR-15a-3p
chr2:206959646-206960515-	hsa-miR-5684	hsa-miR-4254	hsa-miR-2682-3p	hsa-miR-2110	hsa-miR-147a
chr17:18770595-18781183+	hsa-miR-6781-3p	hsa-miR-6823-3p	hsa-miR-1303	hsa-miR-3139	hsa-miR-5689
chr7:72157071-72159812-	hsa-miR-4667-5p	hsa-miR-8089	hsa-miR-4700-5p	hsa-miR-6852-5p	hsa-miR-3916
chr8:117668095-117671219-	hsa-miR-6783-5p	hsa-miR-4491	hsa-miR-1269b	hsa-miR-532-5p	hsa-miR-1269a
chr9:114842354-114874120-	hsa-miR-6876-3p	hsa-miR-626	hsa-miR-384	hsa-miR-614	hsa-miR-761
chrX:109263580-109310624+	hsa-miR-7160-3p	hsa-miR-4327	hsa-miR-6764-5p	hsa-miR-6762-3p	hsa-miR-1915-3p
chr5:35212047-35212198-	hsa-miR-6818-5p	hsa-miR-8057	hsa-miR-4504	hsa-miR-7155-3p	hsa-miR-3975
chr8:103299661-103300494-	hsa-miR-4646-3p	hsa-miR-2276-5p	hsa-miR-6736-3p	hsa-miR-1266-3p	hsa-miR-4267
chr11:68326034-68331900+	hsa-miR-4724-5p	hsa-miR-6839-5p	hsa-miR-7154-5p	hsa-miR-6833-5p	hsa-miR-3691-3p
chr2:162036125-162061304+	hsa-miR-4474-3p	hsa-miR-6881-3p	hsa-miR-767-3p	hsa-miR-1267	hsa-miR-573
chr1:169806068-169819468+	hsa-miR-642b-5p	hsa-miR-4318	hsa-miR-614	hsa-miR-24-1-5p	hsa-miR-4527
chr8:68070682-68071372+	hsa-miR-4659a-3p	hsa-miR-6873-3p	hsa-miR-3121-5p	hsa-miR-27a-3p	hsa-miR-495-5p
chr4:48512076-48517292-	hsa-miR-877-3p	hsa-miR-3145-5p	hsa-miR-4643	hsa-miR-297	hsa-miR-5002-3p
chr5:149921132-149925048+	hsa-miR-3202	hsa-miR-6877-5p	hsa-miR-4725-3p	hsa-miR-1538	hsa-miR-450a-1-3p
chr3:155545971-155560342-	hsa-miR-1268b	hsa-miR-1268a	hsa-miR-663b	hsa-miR-1537-5p	hsa-miR-4437
chr18:8085669-8088849+	hsa-miR-7157-3p	hsa-miR-223-3p	hsa-miR-7155-3p	hsa-miR-1193	hsa-miR-5588-5p
chr17:74734364-74738130+	hsa-miR-24-3p	hsa-miR-548al	hsa-miR-4470	hsa-miR-4681	hsa-miR-34b-5p
chr1:32384571-32385259-	hsa-miR-6500-3p	hsa-miR-6739-5p	hsa-miR-6813-5p	hsa-miR-595	hsa-miR-203a-3p
chr20:24608506-24608663+	hsa-miR-5092	hsa-miR-6823-3p	hsa-miR-5193	hsa-miR-6829-3p	hsa-miR-6854-5p
chr10:98303833-98325183-	hsa-miR-195-5p	hsa-miR-5094	hsa-miR-365b-3p	hsa-miR-365a-3p	hsa-miR-6873-3p
chr1:48821342-48825442-	hsa-miR-6761-5p	hsa-miR-490-5p	hsa-miR-21-3p	hsa-miR-4531	hsa-miR-4319
chr20:45912315-45927616-	hsa-miR-543	hsa-miR-4711-5p	hsa-miR-1299	hsa-miR-1322	hsa-miR-19b-3p
chr8:124089351-124138927+	hsa-miR-1193	hsa-miR-3064-3p	hsa-miR-597-5p	hsa-miR-3192-5p	hsa-miR-3689a-3p
chr17:20107646-20109249+	hsa-miR-6852-5p	hsa-miR-3654	hsa-miR-3147	hsa-miR-1229-3p	hsa-miR-7851-3p
chr7:6852607-6862991-	hsa-miR-370-5p	hsa-miR-4799-3p	hsa-miR-6512-5p	hsa-miR-3137	hsa-miR-6134
chr3:138244332-138291774-	hsa-miR-6893-3p	hsa-miR-370-3p	hsa-miR-519a-3p	hsa-miR-519c-3p	hsa-miR-519b-3p
chr12:112654096-112654999-	hsa-miR-6812-3p	hsa-miR-4795-5p	hsa-miR-143-3p	hsa-miR-3155a	hsa-miR-3688-3p
chr15:57564472-57574796+	hsa-miR-6855-5p	hsa-miR-5572	hsa-miR-182-5p	hsa-miR-3170	hsa-miR-628-5p
chr3:138453476-138456728-	hsa-miR-103a-3p	hsa-miR-107	hsa-miR-3681-5p	hsa-miR-486-3p	hsa-miR-6813-5p
chr13:53007797-53009017-	hsa-miR-6856-3p	hsa-miR-4720-5p	hsa-miR-4731-5p	hsa-miR-145-5p	hsa-miR-6852-3p
chr8:120800578-120810086-	hsa-miR-143-3p	hsa-miR-3167	hsa-miR-7151-5p	hsa-miR-4682	hsa-miR-203b-5p
chr1:150464887-150469384+	hsa-miR-24-3p	hsa-miR-4685-5p	hsa-miR-5088-5p	hsa-miR-6796-5p	hsa-miR-6837-5p
chr3:121186366-121191011-	hsa-miR-6780a-3p	hsa-miR-6845-3p	hsa-miR-4641	hsa-miR-659-3p	hsa-miR-3142
chr2:238617187-238629465+	hsa-miR-1237-3p	hsa-miR-6071	hsa-miR-2277-5p	hsa-miR-6760-3p	hsa-miR-6743-3p
chr4:184567641-184572480-	hsa-miR-4502	hsa-miR-450a-2-3p	hsa-miR-6857-5p	hsa-miR-4677-5p	hsa-miR-346
chr19:11759173-11761232+	hsa-miR-127-3p	hsa-miR-92b-5p	hsa-miR-4664-3p	hsa-miR-660-3p	hsa-miR-155-3p
chr14:39517856-39524500-	hsa-miR-6878-5p	hsa-miR-1252-5p	hsa-miR-6828-3p	hsa-miR-6720-5p	hsa-miR-6791-3p
chr8:141595218-141616013-	hsa-miR-4739	hsa-miR-328-5p	hsa-miR-6885-5p	hsa-miR-1321	hsa-miR-6802-5p
chr14:81837332-81837529-	hsa-miR-4270	hsa-miR-7157-5p	hsa-miR-3616-3p	hsa-miR-6764-5p	hsa-miR-138-5p
chr15:41648237-41669502+	hsa-miR-6846-3p	hsa-miR-6890-5p	hsa-miR-4294	hsa-miR-6881-5p	hsa-miR-6836-5p
chr18:9522158-9522507-	hsa-miR-888-5p	hsa-miR-6778-5p	hsa-miR-4776-5p	hsa-miR-1255a	hsa-miR-1233-5p
chr8:68030483-68049838+	hsa-miR-3680-3p	hsa-miR-6769b-5p	hsa-miR-711	hsa-miR-6868-3p	hsa-miR-6769a-5p
chr13:36886282-36886614-	hsa-miR-2115-5p	hsa-miR-103a-2-5p	hsa-miR-187-5p	hsa-miR-362-5p	hsa-miR-29a-3p
chr13:77732072-77732244-	hsa-miR-4742-5p	hsa-miR-1343-3p	hsa-miR-5004-3p	hsa-miR-6783-3p
chr6:88331072-88331731+	hsa-miR-3529-5p	hsa-miR-105-3p	hsa-miR-379-5p	hsa-miR-23c	hsa-miR-1197
chr10:93699709-93702325-	hsa-miR-6867-5p	hsa-miR-1827	hsa-miR-1285-3p	hsa-miR-3619-5p	hsa-miR-4758-5p
chr17:29070319-29096983+	hsa-miR-135b-5p	hsa-miR-135a-5p	hsa-miR-6804-3p	hsa-miR-4420	hsa-miR-215-3p
chr5:142168995-142172338+	hsa-miR-299-3p	hsa-miR-6759-5p	hsa-miR-342-5p	hsa-miR-6080	hsa-miR-4664-5p
chr8:104075183-104078675+	hsa-miR-3977	hsa-miR-599	hsa-miR-203b-5p	hsa-miR-1587	hsa-miR-624-3p
chr12:27455074-27465605+	hsa-miR-6752-5p	hsa-miR-7110-5p	hsa-miR-637	hsa-miR-6842-5p	hsa-miR-4732-5p
chr2:223478530-223507724-	hsa-miR-6893-3p	hsa-miR-4715-3p	hsa-miR-1290	hsa-miR-6866-5p	hsa-miR-4459
chr4:88104355-88116842-	hsa-miR-3977	hsa-miR-26b-3p	hsa-miR-197-5p	hsa-miR-3132	hsa-miR-3194-3p
chr2:174223440-174224219+	hsa-miR-361-5p	hsa-miR-4420	hsa-miR-1468-3p	hsa-miR-6837-3p	hsa-miR-4256
chr7:16317754-16348252-	hsa-miR-301a-3p	hsa-miR-454-3p	hsa-miR-301b-3p	hsa-miR-4671-3p	hsa-miR-130a-3p
chr8:67383665-67386173+	hsa-miR-3591-3p	hsa-miR-21-3p	hsa-miR-193a-5p	hsa-miR-6758-5p	hsa-miR-1273h-5p
chr10:71255350-71265996+	hsa-miR-4258	hsa-miR-6507-3p	hsa-miR-3665	hsa-miR-4440	hsa-miR-8064
chr2:100046302-100052403+	hsa-miR-629-3p	hsa-miR-135a-3p	hsa-miR-4286	hsa-miR-6865-5p	hsa-miR-5000-3p
chr4:89708904-89711778-	hsa-miR-4448	hsa-miR-4793-5p	hsa-miR-3960	hsa-miR-218-2-3p	hsa-miR-1269a
chr17:3717616-3721866-	hsa-miR-877-3p	hsa-miR-5193	hsa-miR-6881-3p	hsa-miR-661	hsa-miR-4277
chr5:131013396-131034695-	hsa-miR-6801-5p	hsa-miR-494-5p	hsa-miR-6793-5p	hsa-miR-2909	hsa-miR-4645-5p
chr11:62491059-62491898-	hsa-miR-5193	hsa-miR-4459	hsa-miR-204-5p	hsa-miR-211-5p	hsa-miR-4695-5p
chr11:3712577-3714605-	hsa-miR-4663	hsa-miR-103a-2-5p	hsa-miR-6079	hsa-miR-4690-5p	hsa-miR-4443
chr6:33232623-33234489-	hsa-miR-504-3p	hsa-miR-6747-3p	hsa-miR-4284	hsa-miR-450a-2-3p	hsa-miR-4437
chr9:34286615-34297112-	hsa-miR-6806-3p	hsa-miR-376a-3p	hsa-miR-376b-3p	hsa-miR-6783-3p	hsa-miR-4301
chr2:66668546-66691352+	hsa-miR-4446-3p	hsa-miR-6837-3p	hsa-miR-6131	hsa-miR-660-3p	hsa-miR-4724-3p
chr6:81964779-81964941+	hsa-miR-3175	hsa-miR-450a-2-3p	hsa-miR-4682	hsa-miR-203a-3p	hsa-miR-577
chr2:61717777-61729445-	hsa-miR-873-5p	hsa-miR-3152-5p	hsa-miR-4778-3p	hsa-miR-125a-5p	hsa-miR-485-5p
chr7:155457869-155493638+	hsa-miR-6868-3p	hsa-miR-452-3p	hsa-miR-613	hsa-miR-5193	hsa-miR-4268
chr5:145539937-145551553-	hsa-miR-6809-3p	hsa-miR-1972	hsa-miR-6511b-5p	hsa-miR-4778-3p	hsa-miR-4676-5p
chr11:67203190-67203398-	hsa-miR-3605-3p	hsa-miR-939-5p	hsa-miR-6852-5p	hsa-miR-6836-5p	hsa-miR-5008-5p
chr7:155465561-155477746+	hsa-miR-452-3p	hsa-miR-5193	hsa-miR-4268	hsa-miR-125b-5p	hsa-miR-512-5p
chr11:68369331-68370960+	hsa-miR-6504-5p	hsa-miR-5193	hsa-miR-4685-5p	hsa-miR-205-5p	hsa-miR-935
chr21:34120810-34127664-	hsa-miR-561-5p	hsa-miR-3191-5p	hsa-miR-653-3p	hsa-miR-28-5p	hsa-miR-4753-5p
chr5:7720186-7720337-	hsa-miR-877-3p	hsa-miR-4695-5p	hsa-miR-6892-3p	hsa-miR-6845-3p	hsa-miR-5008-5p
chr3:57649363-57658165-	hsa-miR-640	hsa-miR-5695	hsa-miR-1248	hsa-miR-665	hsa-miR-4490
chr8:27605594-27619975-	hsa-miR-541-3p	hsa-miR-6758-3p	hsa-miR-4537	hsa-miR-7111-3p	hsa-miR-6833-3p
chr15:72810408-72837305+	hsa-miR-4795-5p	hsa-miR-4465	hsa-miR-3973	hsa-miR-3616-5p	hsa-miR-5697
chr10:1125951-1126416-	hsa-miR-6081	hsa-miR-760	hsa-miR-3667-5p	hsa-miR-1178-5p	hsa-miR-296-5p
chr1:32495899-32497241+	hsa-miR-129-2-3p	hsa-miR-129-1-3p	hsa-miR-508-3p	hsa-miR-3938	hsa-miR-3617-3p
chr2:215657021-215661841-	hsa-miR-4704-3p	hsa-miR-1178-3p	hsa-miR-584-3p	hsa-miR-6772-5p	hsa-miR-15b-3p
chr4:54265897-54294350-	hsa-miR-6856-5p	hsa-miR-1306-5p	hsa-miR-1248	hsa-miR-2682-5p	hsa-miR-6776-3p
chr22:31837760-31839080-	hsa-miR-4292	hsa-miR-6791-5p	hsa-miR-6788-5p	hsa-miR-363-5p	hsa-miR-609
chr4:129857810-129892154-	hsa-miR-4763-5p	hsa-miR-4787-5p	hsa-miR-1273g-3p	hsa-miR-544a	hsa-miR-3916
chr11:107968363-107969256+	hsa-miR-3121-5p	hsa-miR-539-3p	hsa-miR-6073	hsa-miR-6731-3p	hsa-miR-4703-3p
chr18:76870355-76886375+	hsa-miR-3976	hsa-miR-548ba	hsa-miR-150-3p	hsa-miR-133a-5p	hsa-miR-216b-3p
chr14:66188493-66210193-	hsa-miR-7852-3p	hsa-miR-212-5p	hsa-miR-190b	hsa-miR-190a-5p	hsa-miR-1260b
chr9:2181571-2192802+	hsa-miR-7106-5p	hsa-miR-8065	hsa-miR-6778-5p	hsa-miR-6798-5p	hsa-miR-939-5p
chr1:220364410-220383831-	hsa-miR-4716-3p	hsa-miR-20a-3p	hsa-miR-6794-5p	hsa-miR-4524a-3p	hsa-miR-4457
chr17:49340635-49346265+	hsa-miR-6891-3p	hsa-miR-6885-3p	hsa-miR-670-3p	hsa-miR-892b	hsa-miR-410-5p
chr11:17190224-17191353-	hsa-miR-7109-3p	hsa-miR-4661-3p	hsa-miR-5681a	hsa-miR-4538	hsa-miR-5088-5p
chr21:46536848-46540874+	hsa-miR-936	hsa-miR-4999-3p	hsa-let-7c-3p	hsa-miR-4691-5p	hsa-miR-302b-5p
chr12:50824278-50829407+	hsa-miR-7107-3p	hsa-miR-6728-5p	hsa-miR-5187-5p	hsa-miR-6875-3p	hsa-miR-1182
chr16:12426550-12426707+	hsa-miR-4436b-3p	hsa-miR-151a-5p	hsa-miR-6780a-5p	hsa-miR-151b	hsa-miR-5787
chr2:55873394-55874588-	hsa-miR-545-3p	hsa-miR-138-2-3p	hsa-miR-1202	hsa-miR-371a-3p	hsa-miR-6884-3p
chr14:35476489-35484036+	hsa-miR-661	hsa-miR-3977	hsa-miR-302c-3p	hsa-miR-302b-3p	hsa-miR-302a-3p
chr8:42725147-42743014-	hsa-miR-4747-5p	hsa-miR-6511b-5p	hsa-miR-1262	hsa-miR-6753-5p	hsa-miR-4695-5p
chr1:94921289-94933563+	hsa-miR-6826-3p	hsa-miR-624-5p	hsa-miR-649	hsa-miR-499a-3p	hsa-miR-338-3p
chr22:26057543-26063767+	hsa-miR-4719	hsa-miR-4764-5p	hsa-miR-1261	hsa-miR-4659b-3p	hsa-miR-433-3p
chr9:132740744-132761338-	hsa-miR-1268b	hsa-miR-1268a	hsa-miR-4473	hsa-miR-3619-3p	hsa-miR-7703
chr17:64359276-64360707+	hsa-miR-145-3p	hsa-miR-1273g-3p	hsa-miR-1273h-5p	hsa-miR-3670	hsa-miR-10b-5p
chr19:13054351-13054802+	hsa-miR-6891-3p	hsa-miR-5193	hsa-miR-6072	hsa-miR-5196-3p	hsa-miR-2355-3p
chr18:18547713-18549169-	hsa-miR-6873-3p	hsa-miR-6780a-3p	hsa-miR-3925-3p	hsa-miR-6868-3p	hsa-miR-4762-5p
chr3:40502898-40503739-	hsa-miR-1178-5p	hsa-miR-6804-3p	hsa-miR-8073	hsa-miR-338-3p	hsa-miR-302a-3p
chr3:52960047-52962357-	hsa-miR-6848-5p	hsa-miR-6821-5p	hsa-miR-4690-3p	hsa-miR-4667-5p	hsa-miR-6846-5p
chr8:141856359-141900868-	hsa-miR-6886-5p	hsa-miR-758-3p	hsa-miR-6812-3p	hsa-miR-6769b-5p	hsa-miR-182-5p
chr4:185552919-185559622-	hsa-miR-412-3p	hsa-miR-544b	hsa-miR-670-5p	hsa-miR-6754-3p	hsa-miR-378a-5p
chr2:227729320-227788879+	hsa-miR-6795-5p	hsa-miR-6887-5p	hsa-miR-3175	hsa-miR-3179	hsa-miR-193b-3p
chr17:58275621-58292135-	hsa-miR-6891-3p	hsa-miR-6072	hsa-miR-544b	hsa-miR-4741	hsa-miR-196b-5p
chr6:34256517-34279828-	hsa-miR-4707-3p	hsa-miR-4743-5p	hsa-miR-1228-5p	hsa-miR-1322	hsa-miR-4290
chr17:38551701-38552717-	hsa-miR-3158-3p	hsa-miR-3186-3p	hsa-miR-5001-3p	hsa-miR-584-5p	hsa-miR-6738-3p
chr17:25628814-25631937+	hsa-miR-4256	hsa-miR-6818-3p	hsa-miR-543	hsa-miR-182-5p	hsa-miR-10b-5p
chr20:35177709-35178031+	hsa-miR-328-5p	hsa-miR-6769a-3p	hsa-miR-6840-3p	hsa-miR-3651	hsa-miR-4685-5p
chr5:73136305-73136585+	hsa-miR-4446-3p	hsa-miR-5581-3p	hsa-miR-4498	hsa-miR-3127-5p	hsa-miR-4455
chr1:176104146-176133027-	hsa-miR-5195-3p	hsa-miR-145-5p	hsa-miR-6873-3p	hsa-miR-3187-3p	hsa-miR-584-3p
chr14:59819244-59826222+	hsa-miR-8061	hsa-miR-1226-5p	hsa-miR-586	hsa-miR-301a-3p	hsa-miR-593-5p
chr7:158577784-158591763-	hsa-miR-340-3p	hsa-miR-6827-3p	hsa-miR-6849-3p	hsa-miR-4755-3p	hsa-miR-1273g-3p
chr2:201814277-201822856-	hsa-miR-4691-5p	hsa-miR-380-5p	hsa-miR-1236-3p	hsa-miR-4268	hsa-miR-3659
chr14:69588934-69616220-	hsa-miR-4645-5p	hsa-miR-4686	hsa-miR-4781-3p	hsa-miR-4742-5p	hsa-miR-4673
chr1:50956260-51001129+	hsa-miR-1225-5p	hsa-miR-130b-5p	hsa-miR-608	hsa-miR-1909-5p	hsa-miR-3124-3p
chr3:185644389-185650634-	hsa-miR-155-3p	hsa-miR-7160-3p	hsa-miR-10b-5p	hsa-miR-8058	hsa-miR-1276
chr19:58290119-58291514+	hsa-miR-3925-3p	hsa-miR-188-3p	hsa-miR-199a-5p	hsa-miR-199b-5p	hsa-miR-7703
chr10:98667022-98704002+	hsa-miR-7161-3p	hsa-miR-3657	hsa-miR-6510-3p	hsa-miR-6792-5p	hsa-miR-217
chr5:94267658-94289065-	hsa-miR-6881-5p	hsa-miR-188-3p	hsa-miR-4663	hsa-miR-4308	hsa-miR-6875-3p
chr19:47589641-47589795-	hsa-miR-210-5p	hsa-miR-1913	hsa-miR-6823-3p	hsa-miR-4641	hsa-miR-877-3p
chr1:63269390-63300523+	hsa-miR-2115-3p	hsa-miR-202-5p	hsa-miR-20a-3p	hsa-miR-628-5p	hsa-miR-548g-3p
chr8:17106661-17159932+	hsa-miR-4462	hsa-miR-6795-5p	hsa-miR-505-5p	hsa-miR-5008-5p	hsa-miR-149-5p
chr11:93523740-93535138+	hsa-miR-6854-5p	hsa-miR-6834-5p	hsa-miR-7107-3p	hsa-miR-548s	hsa-miR-6758-3p
chr18:76886267-76936907+	hsa-miR-5096	hsa-miR-21-3p	hsa-miR-4715-3p	hsa-miR-1272	hsa-miR-100-3p
chr20:23370583-23383709-	hsa-miR-647	hsa-miR-4291	hsa-miR-922	hsa-miR-3187-5p	hsa-miR-4660
chr1:65047839-65068595+	hsa-miR-6126	hsa-miR-6824-5p	hsa-miR-3129-5p	hsa-miR-4769-5p	hsa-miR-219b-3p
chr1:243288547-243289436-	hsa-miR-1324	hsa-miR-4441	hsa-miR-3118	hsa-miR-552-5p	hsa-miR-301b-3p
chr9:33971649-33973235-	hsa-miR-4427	hsa-miR-767-5p	hsa-miR-4433b-5p	hsa-miR-589-5p	hsa-miR-1205
chr6:112101769-112139943-	hsa-miR-4423-5p	hsa-miR-7152-3p	hsa-miR-4661-5p	hsa-miR-7107-3p	hsa-miR-449b-3p
chr2:139316592-139322563+	hsa-miR-4793-3p	hsa-miR-4684-5p	hsa-miR-19a-3p	hsa-miR-19b-3p	hsa-miR-4683
chr1:78390873-78401729+	hsa-miR-6881-3p	hsa-miR-516b-3p	hsa-miR-516a-3p	hsa-miR-7162-5p	hsa-miR-877-3p
chr10:76153899-76158337+	hsa-miR-145-5p	hsa-miR-1288-5p	hsa-miR-4733-5p	hsa-miR-3649	hsa-miR-15a-5p
chr20:50776662-50782564-	hsa-miR-6743-3p	hsa-miR-6876-3p	hsa-miR-7150	hsa-miR-8085	hsa-miR-4487
chr6:37342396-37344809+	hsa-miR-6868-3p	hsa-miR-1236-3p	hsa-miR-6844	hsa-miR-636	hsa-miR-4511
chr5:68400458-68404263+	hsa-miR-3926	hsa-miR-4524b-5p	hsa-miR-203b-5p	hsa-miR-6869-5p	hsa-miR-6073
chr7:93625577-93628606-	hsa-miR-6839-3p	hsa-miR-6823-3p	hsa-miR-4659b-3p	hsa-miR-4659a-3p	hsa-miR-499b-5p
chr14:21834598-21838647-	hsa-miR-3160-5p	hsa-miR-4291	hsa-miR-4660	hsa-miR-449c-5p	hsa-miR-646
chr8:103236274-103237246-	hsa-miR-4686	hsa-miR-769-3p	hsa-miR-6823-3p	hsa-miR-4708-3p	hsa-miR-3921
chr20:826385-826574+	hsa-miR-6877-3p	hsa-miR-3152-5p	hsa-miR-3934-5p	hsa-miR-1910-5p	hsa-miR-2114-3p
chr8:100443765-100533238+	hsa-miR-6852-5p	hsa-miR-6505-5p	hsa-miR-6500-3p	hsa-miR-1245b-5p	hsa-miR-4715-5p
chr14:66082696-66083909+	hsa-miR-433-3p	hsa-miR-5009-3p	hsa-miR-27b-3p	hsa-miR-27a-3p	hsa-miR-7107-3p
chr17:27857425-27861318+	hsa-miR-155-5p	hsa-miR-3157-5p	hsa-miR-5004-3p	hsa-miR-2276-5p	hsa-miR-6893-3p
chr7:91700219-91707189+	hsa-miR-4642	hsa-miR-7152-5p	hsa-miR-548g-3p	hsa-miR-448	hsa-miR-145-5p
chr15:76152219-76175765+	hsa-miR-205-5p	hsa-miR-4778-3p	hsa-miR-4750-3p	hsa-miR-301a-5p	hsa-miR-6780a-3p
chr1:164761731-164769126+	hsa-miR-6746-3p	hsa-miR-8057	hsa-miR-637	hsa-miR-4258	hsa-miR-181a-2-3p
chr2:99217046-99220654-	hsa-miR-1273g-3p	hsa-miR-566	hsa-miR-1296-5p	hsa-miR-891b	hsa-miR-380-3p
chr15:57345726-57356021+	hsa-miR-3613-5p	hsa-miR-544a	hsa-miR-6865-5p	hsa-miR-6815-5p	hsa-miR-4476
chr20:16506737-16509085-	hsa-miR-515-3p	hsa-miR-6800-5p	hsa-miR-922	hsa-miR-8070	hsa-miR-1200
chr22:29176936-29177160+	hsa-miR-3653-5p	hsa-miR-203a-5p	hsa-miR-4719	hsa-miR-4793-5p	hsa-miR-3925-3p
chr4:42545934-42554627-	hsa-miR-6875-3p	hsa-miR-8082	hsa-miR-542-3p	hsa-miR-647	hsa-miR-4708-5p
chr13:21987791-21995303-	hsa-miR-576-3p	hsa-miR-4716-3p	hsa-miR-6794-5p	hsa-miR-6830-3p	hsa-miR-4773
chr2:68729863-68753374+	hsa-miR-4436b-5p	hsa-miR-3976	hsa-miR-4507	hsa-miR-516b-3p	hsa-miR-516a-3p
chrX:153577316-153577760-	hsa-miR-615-5p	hsa-miR-6865-5p	hsa-miR-6734-5p	hsa-miR-6793-3p	hsa-miR-4763-3p
chr10:24918925-25003307-	hsa-miR-1268b	hsa-miR-1268a	hsa-miR-4707-3p	hsa-miR-4707-5p	hsa-miR-33b-3p
chr17:3988964-3989949-	hsa-miR-298	hsa-miR-4712-5p	hsa-miR-4660	hsa-miR-212-5p	hsa-miR-516b-5p
chr11:36400931-36403325+	hsa-miR-6734-5p	hsa-miR-3922-3p	hsa-miR-3689a-3p	hsa-miR-6751-3p	hsa-miR-8089
chr15:58919899-58925558-	hsa-miR-199b-5p	hsa-miR-376a-5p	hsa-miR-4427	hsa-miR-199a-5p	hsa-miR-30b-3p
chr13:28840852-28845003+	hsa-miR-338-3p	hsa-miR-92a-1-5p	hsa-miR-523-5p	hsa-miR-518e-5p	hsa-miR-519a-5p
chr12:111916874-111948386-	hsa-miR-6780a-5p	hsa-miR-1273h-5p	hsa-miR-3136-3p	hsa-miR-331-5p	hsa-miR-30b-3p
chr19:14568843-14569187+	hsa-miR-1226-5p	hsa-miR-6852-5p	hsa-miR-3928-5p	hsa-miR-23b-5p	hsa-miR-1913
chr3:157936479-157948687+	hsa-miR-3675-5p	hsa-miR-4802-3p	hsa-miR-765	hsa-miR-3977	hsa-miR-143-5p
chr3:169854207-169896726-	hsa-miR-647	hsa-miR-128-1-5p	hsa-miR-1302	hsa-miR-671-5p	hsa-miR-128-2-5p
chr20:43607084-43615937+	hsa-miR-3182	hsa-miR-4666b	hsa-miR-4323	hsa-miR-6773-3p	hsa-miR-2054
chr6:70423537-70428973-	hsa-miR-188-5p	hsa-miR-374a-3p	hsa-miR-5707	hsa-miR-515-3p	hsa-miR-519e-3p
chr7:74119496-74125440+	hsa-miR-22-3p	hsa-miR-6762-5p	hsa-miR-6793-5p	hsa-miR-7113-5p	hsa-miR-4254
chr5:108373123-108436220+	hsa-miR-137	hsa-miR-455-5p	hsa-miR-6876-3p	hsa-miR-629-3p	hsa-miR-19b-3p
chr11:76696687-76709865+	hsa-miR-548ag	hsa-miR-548ba	hsa-miR-570-5p	hsa-miR-548ai	hsa-miR-548g-3p
chr10:38301226-38343439+	hsa-miR-660-3p	hsa-miR-26b-3p	hsa-miR-6783-3p	hsa-miR-4268	hsa-miR-4704-3p
chr3:196876614-196888609-	hsa-miR-211-3p	hsa-miR-214-3p	hsa-miR-4645-3p	hsa-miR-6769b-5p	hsa-miR-6769a-5p
chr10:103552596-103567658-	hsa-miR-6865-5p	hsa-miR-4448	hsa-miR-7114-5p	hsa-miR-5011-3p	hsa-miR-492
chr9:114873924-114886716-	hsa-miR-1226-5p	hsa-miR-424-5p	hsa-miR-7111-5p	hsa-miR-15b-5p	hsa-miR-647
chr3:69267473-69273841-	hsa-miR-339-5p	hsa-miR-7158-5p	hsa-miR-4724-5p	hsa-miR-769-5p	hsa-miR-6790-3p
chr2:201721405-201726585-	hsa-miR-4693-5p	hsa-miR-1248	hsa-miR-6513-5p	hsa-miR-6860	hsa-miR-4436b-5p
chr20:33523379-33524826-	hsa-miR-3190-5p	hsa-miR-3614-3p	hsa-miR-4717-3p	hsa-miR-4435	hsa-miR-183-5p
chr6:74190398-74191967+	hsa-miR-4671-5p	hsa-miR-1184	hsa-miR-3127-5p	hsa-miR-4638-5p	hsa-miR-548q
chr1:108226110-108247683-	hsa-miR-4440	hsa-miR-6868-5p	hsa-miR-4764-5p	hsa-miR-4635	hsa-miR-3657
chr3:197765438-197766071+	hsa-miR-92a-1-5p	hsa-miR-4507	hsa-miR-8075	hsa-miR-3940-5p	hsa-miR-6134
chr9:79862175-79898566+	hsa-miR-185-3p	hsa-miR-361-5p	hsa-miR-573	hsa-miR-587	hsa-miR-3614-3p
chr5:145634506-145634655+	hsa-miR-3923	hsa-miR-4682	hsa-miR-3120-5p	hsa-miR-5704	hsa-miR-1295a
chr15:57407923-57409561+	hsa-miR-30b-3p	hsa-miR-6780a-5p	hsa-miR-1273h-5p	hsa-miR-339-5p	hsa-miR-5693
chr5:108373123-108382899+	hsa-miR-137	hsa-miR-455-5p	hsa-miR-6876-3p	hsa-miR-629-3p	hsa-miR-1279
chr3:57850534-57857425+	hsa-miR-4258
chr1:150997991-151001420+	hsa-miR-1229-5p	hsa-miR-6810-5p	hsa-miR-4314	hsa-miR-221-5p	hsa-miR-4646-5p
chr15:23191491-23191920-	hsa-miR-6818-3p	hsa-miR-367-5p	hsa-miR-4693-5p	hsa-miR-4427	hsa-miR-3160-5p
chr16:53262895-53276928+	hsa-miR-218-5p	hsa-miR-670-5p	hsa-miR-3155a	hsa-miR-3155b	hsa-miR-4288
chr3:37038110-37045965+	hsa-miR-4650-5p	hsa-miR-3124-3p	hsa-miR-4794	hsa-miR-4469	hsa-miR-5187-3p
chr2:243056790-243081039+	hsa-miR-17-3p	hsa-miR-15b-3p	hsa-miR-2355-3p	hsa-miR-219b-3p	hsa-miR-10b-3p
chr2:58449077-58459247+	hsa-miR-1910-5p	hsa-miR-6878-5p	hsa-miR-4423-5p	hsa-miR-1265	hsa-miR-5702
chr8:107691438-107726213+	hsa-miR-3121-5p	hsa-miR-6783-5p	hsa-miR-15b-5p	hsa-miR-5001-3p	hsa-miR-497-5p
chrX:134679348-134686071+	hsa-miR-4673	hsa-miR-4645-5p	hsa-miR-548s	hsa-miR-556-3p	hsa-miR-15a-5p
chr9:3330259-3346764-	hsa-miR-597-5p	hsa-miR-1260b	hsa-miR-500a-3p	hsa-miR-6792-3p	hsa-miR-6786-3p
chr8:110393599-110410777+	hsa-miR-454-3p	hsa-miR-301a-3p	hsa-miR-301b-3p	hsa-miR-3170	hsa-miR-4715-3p
chr7:151902191-151904510-	hsa-miR-6509-5p	hsa-miR-4293	hsa-miR-4762-3p	hsa-miR-7107-3p	hsa-miR-3692-3p
chr12:95546587-95546769-	hsa-miR-182-5p	hsa-miR-3670	hsa-miR-4303	hsa-miR-3921	hsa-miR-6847-3p
chr8:42868194-42868543+	hsa-miR-6817-3p	hsa-miR-6772-3p	hsa-miR-1236-3p	hsa-miR-4758-5p	hsa-miR-301a-5p
chr11:118629483-118630753-	hsa-miR-6792-3p	hsa-miR-4691-5p	hsa-miR-449c-5p	hsa-miR-449b-5p	hsa-miR-449a
chr1:165859441-165860559+	hsa-miR-324-3p	hsa-miR-3934-3p	hsa-miR-580-3p	hsa-miR-4755-5p	hsa-miR-149-5p
chr7:72671516-72680625-	hsa-miR-6833-5p	hsa-miR-4524a-3p	hsa-miR-128-1-5p	hsa-miR-3190-3p	hsa-miR-3136-5p
chr14:39646616-39647120+	hsa-miR-6841-5p	hsa-miR-204-5p	hsa-miR-5006-3p	hsa-miR-3121-5p	hsa-miR-211-5p
chr16:47581344-47581662+	hsa-miR-34a-3p	hsa-miR-7162-5p	hsa-miR-6820-3p	hsa-miR-584-3p	hsa-miR-617
chr9:79825532-79888280+	hsa-miR-1299	hsa-miR-486-3p	hsa-miR-3200-5p	hsa-miR-6864-5p	hsa-miR-6826-5p
chr15:66727365-66729230+	hsa-miR-6861-5p	hsa-miR-3943	hsa-miR-1233-5p	hsa-miR-1184	hsa-miR-639
chr15:58913670-58920082-	hsa-miR-424-5p	hsa-miR-376a-5p	hsa-miR-6754-3p	hsa-miR-412-3p	hsa-miR-1179
chr12:56956201-56965639+	hsa-miR-1271-3p	hsa-miR-6131	hsa-miR-550a-5p	hsa-miR-550a-3-5p	hsa-miR-6826-3p
chr14:63881858-63888812-	hsa-miR-595	hsa-miR-4762-3p	hsa-miR-588	hsa-miR-4507	hsa-miR-182-5p
chr16:2745936-2752479+	hsa-miR-483-3p	hsa-miR-3667-3p	hsa-miR-92a-2-5p	hsa-miR-6792-3p	hsa-miR-4537
chr14:96986392-96987409+	hsa-miR-4326	hsa-miR-4434	hsa-miR-191-3p	hsa-miR-6829-5p	hsa-miR-6515-3p
chr3:9839343-9843440+	hsa-miR-4673	hsa-miR-7106-5p	hsa-miR-5089-3p	hsa-miR-378a-5p	hsa-miR-3687
chr15:67524152-67529158-	hsa-miR-3127-5p	hsa-miR-17-3p	hsa-miR-671-5p	hsa-miR-96-5p	hsa-miR-4288
chr15:39875830-39876610+	hsa-miR-5194	hsa-miR-762	hsa-miR-1914-3p	hsa-miR-3913-5p	hsa-miR-6132
chr2:201283973-201284219+	hsa-miR-1909-3p	hsa-miR-4650-5p	hsa-miR-4423-5p	hsa-miR-7114-5p	hsa-miR-604
chr9:128031215-128035928+	hsa-miR-593-5p	hsa-miR-1304-5p	hsa-miR-1273a	hsa-miR-4459	hsa-miR-4778-5p
chr3:56626998-56632328+	hsa-miR-31-5p	hsa-miR-1827	hsa-miR-6849-3p	hsa-miR-1273e	hsa-miR-891a-3p
chr2:85190039-85190246-	hsa-miR-6728-3p	hsa-miR-4685-3p	hsa-miR-4520-3p	hsa-miR-6762-5p	hsa-miR-301a-5p
chr5:61653518-61659147+	hsa-miR-203b-5p	hsa-miR-6718-5p	hsa-miR-4436b-5p	hsa-miR-5003-5p	hsa-miR-1260b
chr17:41893406-41901373-	hsa-miR-6846-5p	hsa-miR-6848-5p	hsa-miR-2467-5p	hsa-miR-660-3p	hsa-miR-4707-3p
chr14:100808735-100809724-	hsa-miR-6132	hsa-miR-6836-5p	hsa-miR-504-3p	hsa-miR-6880-5p	hsa-miR-183-5p
chrX:67412761-67414340-	hsa-miR-6888-3p	hsa-miR-136-5p	hsa-miR-1237-3p	hsa-miR-7843-3p	hsa-miR-646
chr1:51829538-51829700-	hsa-miR-6721-5p	hsa-miR-670-3p	hsa-miR-29c-5p	hsa-miR-4763-3p	hsa-miR-6837-3p
chr4:83978079-83978561+	hsa-miR-6877-3p	hsa-miR-7109-3p	hsa-miR-487b-3p	hsa-miR-4465	hsa-miR-1254
chrX:19947903-19954016-	hsa-miR-4726-5p	hsa-miR-4640-5p	hsa-miR-605-5p	hsa-miR-635	hsa-miR-4765
chr7:74125363-74133260+	hsa-miR-516a-3p	hsa-miR-516b-3p	hsa-miR-4675	hsa-miR-6864-5p	hsa-miR-185-3p
chr8:618598-624047-	hsa-miR-6749-3p	hsa-miR-4707-5p	hsa-miR-6763-3p	hsa-miR-5193	hsa-miR-3130-3p
chr10:126727566-126763412-	hsa-miR-4707-3p	hsa-miR-296-5p	hsa-miR-5095	hsa-miR-765	hsa-miR-5189-5p
chr1:171491316-171492661+	hsa-miR-4277	hsa-miR-4420	hsa-miR-5008-5p	hsa-miR-4493	hsa-miR-3942-3p
chr2:145182363-145274986-	hsa-miR-6881-3p	hsa-miR-6762-3p	hsa-miR-197-3p	hsa-miR-6084	hsa-miR-181d-3p
chr7:105205724-105206095+	hsa-miR-6843-3p	hsa-miR-8062	hsa-miR-5586-5p	hsa-miR-6762-3p	hsa-miR-573
chr6:52132663-52134024-	hsa-miR-1248	hsa-miR-6888-3p	hsa-miR-4741	hsa-miR-5196-3p	hsa-miR-3620-5p
chr5:88199755-88238939+	hsa-miR-4763-5p	hsa-miR-494-5p	hsa-miR-1910-3p	hsa-miR-410-5p	hsa-miR-323b-5p
chr18:3187478-3189085-	hsa-miR-1288-3p	hsa-miR-1254	hsa-miR-3116	hsa-miR-510-5p	hsa-miR-4778-3p
chr1:94924163-94946162+	hsa-miR-6826-3p	hsa-miR-193a-5p	hsa-miR-624-5p	hsa-miR-3657	hsa-miR-5704
chr1:198201683-198248191+	hsa-miR-5693	hsa-miR-1273g-5p	hsa-miR-103a-2-5p	hsa-miR-29b-1-5p	hsa-miR-6797-3p
chr1:20230760-20231480+	hsa-miR-431-3p	hsa-miR-211-5p	hsa-miR-204-5p	hsa-miR-378c	hsa-miR-378a-3p
chr4:110412483-110437796+	hsa-miR-20a-3p	hsa-miR-6503-5p	hsa-miR-1298-3p	hsa-miR-3147	hsa-miR-5586-5p
chr5:72347176-72373320+	hsa-miR-9-5p	hsa-miR-29b-1-5p	hsa-miR-3620-5p	hsa-miR-29a-5p	hsa-miR-378h
chr10:22737654-22737918+	hsa-miR-4502	hsa-miR-3909	hsa-miR-1238-5p	hsa-miR-205-5p	hsa-miR-939-5p
chr13:32768280-32776664+	hsa-miR-885-3p	hsa-miR-608	hsa-miR-4435	hsa-miR-3616-3p	hsa-miR-6841-5p
chr5:66032540-66055690+	hsa-miR-6876-3p	hsa-miR-124-5p	hsa-miR-4727-3p	hsa-miR-626	hsa-miR-6513-3p
chr9:5732388-5738538+	hsa-miR-107	hsa-miR-103a-3p	hsa-miR-342-3p	hsa-miR-4524a-5p	hsa-miR-3684
chr6:84910507-84911485-	hsa-miR-15b-5p	hsa-miR-16-5p	hsa-miR-195-5p	hsa-miR-4694-5p	hsa-miR-15a-5p
chr8:17123416-17126465-	hsa-miR-136-5p	hsa-miR-6782-3p	hsa-miR-3925-3p	hsa-miR-548g-5p	hsa-miR-548aj-5p
chr8:72964774-72974600+	hsa-miR-7110-3p	hsa-miR-6873-3p	hsa-miR-373-3p	hsa-miR-200a-3p	hsa-miR-342-3p
chr2:48036297-48050499-	hsa-miR-6740-3p	hsa-miR-2355-3p	hsa-miR-1236-3p	hsa-miR-6744-3p	hsa-miR-6512-3p
chr12:88490665-88502958-	hsa-miR-4677-5p	hsa-miR-450b-5p	hsa-miR-374c-3p	hsa-miR-486-5p	hsa-miR-6809-3p
chr2:242644068-242648797+	hsa-miR-6872-5p	hsa-miR-3160-5p	hsa-miR-6728-3p	hsa-miR-6841-3p	hsa-miR-2277-3p
chr15:64008501-64008672-	hsa-miR-149-5p	hsa-miR-5193	hsa-miR-544b	hsa-miR-22-5p	hsa-miR-877-3p
chr8:94721999-94731016+	hsa-miR-633	hsa-miR-4691-5p	hsa-miR-382-5p	hsa-miR-6806-5p	hsa-miR-892c-5p
chr14:103923479-103928798+	hsa-miR-509-3-5p	hsa-miR-509-5p	hsa-miR-1273h-3p	hsa-miR-6888-3p	hsa-miR-203b-3p
chr6:91300400-91300560-	hsa-miR-4298	hsa-miR-3190-3p	hsa-miR-7847-3p	hsa-miR-6851-5p	hsa-miR-6134
chr4:16289334-16290668+	hsa-miR-4691-5p	hsa-miR-221-5p	hsa-miR-6796-5p	hsa-miR-8073	hsa-miR-6792-3p
chr3:98487274-98492827+	hsa-miR-6859-5p	hsa-miR-510-5p	hsa-miR-3664-3p	hsa-miR-877-5p	hsa-miR-3916
chr8:37971710-37978667+	hsa-miR-3155a	hsa-miR-3155b	hsa-miR-6893-3p	hsa-miR-484	hsa-miR-410-5p
chr2:24778884-24787299+	hsa-miR-6807-3p	hsa-miR-935	hsa-miR-24-1-5p	hsa-miR-6828-5p	hsa-miR-4781-3p
chr14:103802129-103807462+	hsa-miR-4709-3p	hsa-miR-1301-3p	hsa-miR-5047	hsa-miR-7160-3p	hsa-miR-4731-5p
chr10:74267913-74326552-	hsa-miR-6884-3p	hsa-miR-3915	hsa-miR-204-5p	hsa-miR-4675	hsa-miR-7974
chr2:29158387-29165247+	hsa-miR-6740-3p	hsa-miR-4252	hsa-miR-181a-2-3p	hsa-miR-4742-5p	hsa-miR-4731-5p
chr7:72663923-72671572-	hsa-miR-5587-3p	hsa-miR-6868-3p	hsa-miR-5092	hsa-miR-3977	hsa-miR-513a-5p
chr7:124510965-124522520-	hsa-miR-3977	hsa-miR-1231	hsa-miR-875-3p	hsa-miR-4650-3p	hsa-miR-603
chr20:18189824-18190276-	hsa-miR-1306-5p	hsa-miR-1228-3p
chr3:57561275-57563114-	hsa-miR-4420	hsa-miR-215-3p	hsa-miR-424-5p	hsa-miR-4524a-5p	hsa-miR-562
chr16:2663961-2752479+	hsa-miR-4707-3p	hsa-miR-4649-5p	hsa-miR-1973	hsa-miR-6885-5p	hsa-miR-3180-3p
chr10:71243447-71258152+	hsa-miR-4717-5p	hsa-miR-505-5p	hsa-miR-6507-3p	hsa-miR-6814-5p	hsa-miR-3665
chr6:101163338-101173579-	hsa-let-7b-5p	hsa-miR-98-5p	hsa-miR-6729-3p	hsa-let-7a-5p	hsa-let-7c-5p
chr18:28293884-28294039+	hsa-miR-6830-3p	hsa-miR-3121-5p	hsa-miR-6891-3p	hsa-miR-181c-5p	hsa-miR-770-5p
chr5:66187843-66188026+	hsa-miR-3127-5p	hsa-miR-1322	hsa-miR-1468-3p	hsa-miR-1266-5p	hsa-miR-4314
chrM:14315-14511-	hsa-miR-6859-3p	hsa-miR-6776-3p	hsa-miR-6511b-3p	hsa-miR-6511a-3p	hsa-miR-4301
chr6:131520601-131540948+	hsa-miR-6828-3p	hsa-miR-505-5p	hsa-miR-3974	hsa-miR-6845-3p	hsa-miR-134-5p
chr6:6182221-6182374-	hsa-miR-299-3p	hsa-miR-7151-5p	hsa-miR-6748-5p	hsa-miR-1293	hsa-miR-1909-5p
chr8:100523332-100533238+	hsa-miR-1245b-5p	hsa-miR-6856-5p	hsa-miR-4715-5p	hsa-miR-581	hsa-miR-8060
chr1:62907159-62907970+	hsa-miR-520a-3p	hsa-miR-5588-3p	hsa-miR-520c-3p	hsa-miR-520b	hsa-miR-302d-3p
chr13:52997709-53001354-	hsa-miR-6843-3p	hsa-miR-6795-3p	hsa-miR-4766-3p	hsa-miR-548an	hsa-miR-3182
chr11:9459301-9463744+	hsa-miR-6844	hsa-miR-6754-3p	hsa-miR-582-3p	hsa-miR-412-3p	hsa-miR-548ao-3p
chr17:27834914-27838010+	hsa-miR-7151-5p	hsa-miR-6781-3p	hsa-miR-6819-3p	hsa-miR-1184	hsa-miR-3147
chr10:33093943-33123826+	hsa-miR-4452	hsa-miR-4518	hsa-miR-943	hsa-miR-1266-5p	hsa-miR-187-3p
chr3:10015312-10016172-	hsa-miR-7154-3p	hsa-miR-659-5p	hsa-miR-1537-5p	hsa-miR-502-5p	hsa-miR-5004-5p
chr16:18852887-18856973-	hsa-miR-593-3p	hsa-miR-1205	hsa-miR-7153-3p	hsa-miR-6838-3p	hsa-miR-4722-5p
chr17:58756814-58786686+	hsa-miR-4712-5p	hsa-miR-3169	hsa-miR-3171	hsa-miR-4762-5p	hsa-miR-4697-5p
chr1:186375215-186381025+	hsa-miR-7151-5p	hsa-miR-2054	hsa-miR-219a-2-3p	hsa-miR-345-5p	hsa-miR-1236-3p
chr16:16205232-16205439+	hsa-miR-4643	hsa-miR-455-3p	hsa-miR-4738-5p	hsa-miR-1915-3p	hsa-miR-7160-5p
chr20:18190072-18190855-	hsa-miR-1228-3p	hsa-miR-342-3p	hsa-miR-502-5p	hsa-miR-6841-3p	hsa-miR-1306-5p
chr18:18586312-18603641-	hsa-miR-5047	hsa-miR-20a-3p	hsa-miR-1301-3p	hsa-miR-450b-5p	hsa-miR-148b-5p
chr18:18534744-18535206-	hsa-miR-6879-5p	hsa-miR-608	hsa-miR-96-5p	hsa-miR-6842-5p	hsa-miR-1299
chr2:20454624-20460227-	hsa-miR-664b-5p	hsa-miR-5589-3p	hsa-miR-3692-5p	hsa-miR-4776-3p	hsa-miR-6755-5p
chr5:68886155-68888157+	hsa-miR-6837-5p	hsa-miR-4685-5p	hsa-miR-649	hsa-miR-4666a-5p	hsa-miR-27b-3p
chr17:4210316-4211641-	hsa-miR-1268b	hsa-miR-1268a	hsa-miR-4755-3p	hsa-miR-4792	hsa-miR-891a-3p
chr2:24360779-24384483+	hsa-miR-548o-3p	hsa-miR-4653-3p	hsa-miR-519d-3p	hsa-miR-3064-3p	hsa-miR-619-5p
chr14:50192404-50196266+	hsa-miR-3691-3p	hsa-miR-592	hsa-miR-19a-3p	hsa-miR-19b-3p	hsa-miR-4671-3p
chr8:17808124-17810695+	hsa-miR-5000-5p	hsa-miR-5699-3p	hsa-miR-6738-3p	hsa-miR-4639-3p	hsa-miR-6884-5p
chr8:101960951-101964204-	hsa-miR-6746-3p	hsa-miR-4632-3p	hsa-miR-1199-3p	hsa-miR-6887-5p	hsa-miR-6795-5p
chr2:39993197-39996233-	hsa-miR-3171	hsa-miR-4752	hsa-miR-140-3p	hsa-miR-4287	hsa-miR-3685
chr2:88032486-88032641-	hsa-miR-125a-5p	hsa-miR-499a-3p	hsa-miR-1976	hsa-miR-125b-5p	hsa-miR-3117-5p
chr12:53848510-53853187+	hsa-miR-939-5p	hsa-miR-4300	hsa-miR-378c	hsa-miR-5591-5p	hsa-miR-378a-3p
chrY:14821321-14821476+	hsa-miR-193b-3p	hsa-miR-889-5p	hsa-miR-4529-5p	hsa-miR-6077	hsa-miR-193a-3p
chr3:141678516-141713983-	hsa-miR-1972	hsa-miR-4733-3p	hsa-miR-6753-5p	hsa-miR-3613-5p	hsa-miR-490-5p
chr1:70736539-70781249-	hsa-miR-4777-5p	hsa-miR-3187-5p	hsa-miR-3127-5p	hsa-miR-5189-5p	hsa-miR-6125
chr13:21955573-21965993-	hsa-miR-6736-3p	hsa-miR-4799-3p	hsa-miR-766-3p	hsa-miR-4720-5p	hsa-miR-29b-1-5p
chr2:238622902-238636578+	hsa-miR-604	hsa-miR-6859-3p	hsa-miR-3691-3p	hsa-miR-506-5p	hsa-miR-4782-5p
chr6:86387142-86387593-	hsa-miR-6837-3p	hsa-miR-3126-3p	hsa-miR-4670-5p	hsa-miR-4704-3p	hsa-miR-2277-3p
chr1:246604390-246644611-	hsa-miR-1292-3p	hsa-miR-4695-3p	hsa-miR-6778-3p	hsa-miR-346	hsa-miR-1273a
chr15:25665803-25667108-	hsa-miR-6716-5p	hsa-miR-1-3p	hsa-miR-206	hsa-miR-6751-5p	hsa-miR-6803-5p
chr20:33045195-33059320+	hsa-miR-4435	hsa-miR-7155-5p	hsa-miR-6505-3p	hsa-miR-578	hsa-miR-628-5p
chr7:158586341-158590767-	hsa-miR-942-5p	hsa-miR-609	hsa-miR-3591-3p	hsa-miR-21-3p	hsa-miR-30e-3p
chr11:33358621-33363232+	hsa-miR-654-3p	hsa-miR-4648	hsa-miR-421	hsa-miR-5699-3p	hsa-miR-1267
chr8:27605594-27622768-	hsa-miR-541-3p	hsa-miR-6758-3p	hsa-miR-4537	hsa-miR-7111-3p	hsa-miR-6833-3p
chr4:106367540-106377902-	hsa-miR-9500	hsa-miR-6881-3p	hsa-miR-3688-5p	hsa-miR-3916	hsa-miR-136-5p
chr6:33053556-33095875+	hsa-miR-660-3p	hsa-miR-34a-3p	hsa-miR-505-5p	hsa-miR-1225-3p	hsa-miR-6786-3p
chr7:23643705-23651172+	hsa-miR-4438	hsa-miR-1302	hsa-miR-514a-3p	hsa-miR-5186	hsa-miR-653-3p
chr12:68696400-68697693-	hsa-miR-5703	hsa-miR-4434	hsa-miR-345-3p	hsa-miR-4516	hsa-miR-1179
chr10:112338386-112350890+	hsa-miR-424-5p	hsa-miR-4524a-5p	hsa-miR-497-5p	hsa-miR-4524b-5p	hsa-miR-15b-5p
chr11:120224414-120278532+	hsa-miR-5193	hsa-miR-7155-5p	hsa-miR-596	hsa-miR-4716-3p	hsa-miR-6862-3p
chr13:41650180-41657126+	hsa-miR-1273e	hsa-miR-4763-5p	hsa-miR-891a-3p	hsa-miR-6089	hsa-miR-6504-5p
chr2:32698180-32702651+	hsa-miR-1272	hsa-miR-4644	hsa-miR-4726-5p	hsa-miR-3619-3p	hsa-miR-29a-5p
chr1:21167349-21191755-	hsa-miR-7111-3p	hsa-miR-4524a-5p	hsa-miR-646	hsa-miR-4524b-5p	hsa-miR-7113-3p
chr2:105003178-105003328-	hsa-miR-6754-3p	hsa-miR-6764-3p	hsa-miR-6833-3p	hsa-miR-6715b-3p	hsa-miR-6824-3p
chr17:53062975-53068318+	hsa-miR-1262	hsa-miR-301a-5p	hsa-miR-139-5p	hsa-miR-4465	hsa-miR-526b-5p
chr3:8977555-8983488-	hsa-miR-8066	hsa-miR-7161-5p	hsa-miR-208b-5p	hsa-miR-493-5p	hsa-miR-187-3p
chr13:101039023-101039354+	hsa-miR-136-5p	hsa-miR-6514-5p	hsa-miR-548s	hsa-miR-4687-5p	hsa-miR-135b-3p
chr9:20764868-20770237+	hsa-miR-4420	hsa-miR-555	hsa-miR-1298-3p	hsa-miR-5003-5p	hsa-miR-6861-5p
chr17:11958206-11969522+	hsa-miR-193b-3p	hsa-miR-193a-3p	hsa-miR-5571-5p	hsa-miR-4520-3p	hsa-miR-2392
chr6:119611848-119628157-	hsa-miR-1273d	hsa-miR-3929	hsa-miR-676-5p	hsa-miR-4310	hsa-miR-7157-5p
chr5:109421834-109423390+	hsa-miR-6769b-3p	hsa-miR-3183	hsa-miR-134-5p	hsa-miR-1254	hsa-miR-4782-3p
chr5:159679890-159686778-	hsa-miR-3064-5p	hsa-miR-6504-5p	hsa-miR-1292-3p	hsa-miR-5008-3p	hsa-miR-7157-3p
chr8:143134160-143134326+	hsa-miR-2115-3p	hsa-miR-497-3p	hsa-miR-3651	hsa-miR-590-5p	hsa-miR-21-5p
chr1:235577748-235590554+	hsa-miR-6516-5p	hsa-miR-6780a-3p	hsa-miR-3617-3p	hsa-miR-634	hsa-miR-891b
chr8:96046236-96087980+	hsa-miR-7973	hsa-miR-6859-3p	hsa-miR-5580-5p	hsa-miR-1291	hsa-miR-1178-5p
chr5:60368952-60394859+	hsa-miR-22-5p	hsa-miR-6810-3p	hsa-miR-578	hsa-miR-924	hsa-miR-4677-5p
chr1:147408741-147410931+	hsa-miR-556-5p	hsa-miR-3670	hsa-miR-486-5p
chr15:28857205-28863801+	hsa-miR-6500-5p	hsa-miR-199b-5p	hsa-miR-5591-5p	hsa-miR-6809-3p	hsa-miR-4646-3p
chr1:52263921-52277770-	hsa-miR-766-3p	hsa-miR-1207-3p	hsa-miR-5685	hsa-miR-4778-3p	hsa-miR-450a-2-3p
chr1:156286957-156287338+	hsa-miR-4660	hsa-miR-4763-3p	hsa-let-7b-5p	hsa-miR-383-3p	hsa-miR-1262
chr2:70062987-70063153+	hsa-miR-6508-5p	hsa-miR-585-5p	hsa-miR-4280	hsa-miR-548q	hsa-miR-138-5p
chr6:25515903-25520565+	hsa-miR-6823-5p	hsa-miR-27b-5p	hsa-miR-4685-5p	hsa-miR-143-5p	hsa-miR-6838-3p
chr12:25241034-25243131+	hsa-miR-6738-3p	hsa-miR-216b-3p	hsa-miR-216a-3p	hsa-miR-3183	hsa-miR-186-3p
chr11:94163077-94180604-	hsa-miR-1910-3p	hsa-miR-1302	hsa-miR-3714	hsa-miR-6881-3p	hsa-miR-6511a-5p
chr2:234164748-234172711+	hsa-miR-598-3p	hsa-miR-7113-3p	hsa-miR-339-5p	hsa-miR-581	hsa-miR-1271-3p
chr10:11893996-11894214+	hsa-miR-3191-3p	hsa-miR-6781-5p	hsa-miR-6132	hsa-miR-5095	hsa-miR-6836-5p
chr21:34931536-34932081+	hsa-miR-3682-3p	hsa-miR-4778-3p	hsa-miR-570-3p	hsa-miR-569	hsa-miR-5187-5p
chr4:48503640-48507632-	hsa-miR-3116	hsa-miR-1254	hsa-miR-3161	hsa-miR-6740-3p	hsa-miR-424-5p
chrY:2821950-2825123+	hsa-miR-374c-3p	hsa-miR-4657	hsa-miR-4491	hsa-miR-544a	hsa-miR-5583-3p
chr2:11357216-11359152-	hsa-miR-5195-3p	hsa-miR-6881-3p	hsa-let-7f-2-3p	hsa-miR-5187-3p	hsa-miR-22-5p
chr8:28950262-28967587-	hsa-miR-3141	hsa-miR-6787-5p	hsa-miR-6893-3p	hsa-miR-1908-3p	hsa-miR-4772-3p
chr4:71808540-71816528+	hsa-miR-3152-5p	hsa-miR-3925-3p	hsa-miR-8081	hsa-miR-4448	hsa-miR-146a-5p
chr16:53307538-53308214+	hsa-miR-3614-3p	hsa-miR-342-3p	hsa-miR-6875-3p	hsa-miR-4786-3p	hsa-miR-4755-5p
chr3:138453476-138453646-	hsa-miR-103a-3p	hsa-miR-107	hsa-miR-486-3p	hsa-miR-6819-3p	hsa-miR-3675-5p
chr7:148716363-148718239-	hsa-miR-4284	hsa-miR-4433a-3p	hsa-miR-1273e	hsa-miR-566	hsa-miR-1285-3p
chr17:26495474-26499644-	hsa-miR-3915	hsa-miR-5095	hsa-miR-4435	hsa-miR-555	hsa-miR-8065
chr1:172172222-172172376-	hsa-miR-6728-3p	hsa-miR-1537-5p	hsa-miR-4436a	hsa-miR-6515-5p	hsa-miR-6515-3p
chr4:110434903-110442782+	hsa-miR-5586-5p	hsa-miR-1264	hsa-miR-7974	hsa-miR-4679	hsa-miR-1286
chr2:135694411-135700244+	hsa-miR-5693	hsa-miR-7641	hsa-miR-3605-5p	hsa-miR-1267	hsa-miR-4436b-5p
chr11:46837749-46842819-	hsa-miR-326	hsa-miR-212-5p	hsa-miR-7151-3p	hsa-miR-1284	hsa-miR-4512
chr3:37862505-37876258-	hsa-miR-4315	hsa-miR-4522	hsa-miR-4711-3p	hsa-miR-6760-5p	hsa-miR-29b-2-5p
chr1:197621365-197627499-	hsa-miR-145-5p	hsa-miR-876-3p	hsa-miR-1185-2-3p	hsa-miR-584-3p	hsa-miR-2276-3p
chr6:29901995-29911250+	hsa-miR-6789-3p	hsa-miR-6866-3p	hsa-miR-6727-5p	hsa-miR-4783-3p	hsa-miR-4756-3p
chr3:123649949-123667979-	hsa-miR-3158-3p	hsa-miR-5190	hsa-miR-4691-5p	hsa-miR-943	hsa-miR-23a-3p
chr9:33953283-33989124-	hsa-miR-571	hsa-miR-6844	hsa-miR-3188	hsa-miR-6873-3p	hsa-miR-548s
chr1:30256206-30256383-	hsa-miR-3663-5p	hsa-miR-3928-5p	hsa-miR-6806-3p	hsa-miR-3605-5p	hsa-miR-6762-5p
chr12:104719115-104721449+	hsa-miR-1269a	hsa-miR-1269b	hsa-miR-7107-3p	hsa-miR-338-3p	hsa-miR-22-5p
chr12:62743002-62749256+	hsa-miR-7-5p	hsa-miR-3976	hsa-miR-6088	hsa-miR-1206	hsa-miR-3064-5p
chr1:84644860-84680000+	hsa-miR-6890-3p	hsa-miR-4470	hsa-miR-888-3p	hsa-miR-4527	hsa-miR-659-5p
chr5:76758920-76760634-	hsa-miR-6884-5p	hsa-miR-1252-5p	hsa-miR-485-5p	hsa-miR-574-5p	hsa-miR-2467-3p
chr3:71733723-71748859-	hsa-miR-6722-3p	hsa-miR-6799-5p	hsa-miR-1909-3p	hsa-miR-6849-3p	hsa-miR-661
chr4:2664565-2665015+	hsa-miR-2392	hsa-miR-3200-5p	hsa-miR-6508-3p	hsa-miR-1251-3p	hsa-miR-6803-5p
chr21:16351522-16363627-	hsa-miR-4435	hsa-miR-4476	hsa-miR-6511b-5p	hsa-miR-6876-5p	hsa-miR-1288-3p
chr5:169679438-169694079-	hsa-miR-1207-5p	hsa-miR-5001-3p	hsa-miR-4763-3p	hsa-miR-6864-5p	hsa-miR-6873-3p
chr7:139259874-139260722-	hsa-miR-7154-3p	hsa-miR-3151-5p	hsa-miR-5009-5p	hsa-miR-8058	hsa-miR-1538
chr1:36823840-36824423-	hsa-miR-3173-5p	hsa-miR-4793-3p	hsa-miR-6743-3p	hsa-miR-149-5p	hsa-miR-3944-5p
chr22:36682764-36688115-	hsa-miR-6887-5p	hsa-miR-6842-3p	hsa-miR-4722-3p	hsa-miR-2861	hsa-miR-6781-5p
chr20:36090784-36090938+	hsa-miR-6509-3p	hsa-miR-1273g-3p	hsa-miR-922	hsa-miR-6855-3p	hsa-miR-3680-5p
chr11:108172375-108175579+	hsa-miR-670-5p	hsa-miR-130a-5p	hsa-miR-2113	hsa-miR-432-5p	hsa-miR-1295b-3p
chr18:21087949-21099138+	hsa-miR-4490	hsa-miR-4474-3p	hsa-miR-5090	hsa-miR-4536-5p	hsa-miR-486-3p
chr15:57535670-57555472+	hsa-miR-4691-5p	hsa-miR-6855-3p	hsa-miR-3619-5p	hsa-miR-873-3p	hsa-miR-6844
chr3:114219199-114221711-	hsa-miR-6873-3p	hsa-miR-6809-3p	hsa-miR-4753-3p	hsa-miR-7110-3p	hsa-miR-130b-5p
chr2:158607745-158675071-	hsa-miR-328-5p	hsa-miR-6885-5p	hsa-miR-340-3p	hsa-miR-4763-3p	hsa-miR-6775-3p
chr8:42805531-42814457+	hsa-miR-4530	hsa-miR-922	hsa-miR-6780a-3p	hsa-miR-889-5p	hsa-miR-6875-3p
chr2:101902543-101911643-	hsa-miR-617	hsa-miR-4327	hsa-miR-603	hsa-miR-598-5p	hsa-miR-5011-3p
chr3:123345665-123359351-	hsa-miR-6799-3p	hsa-miR-6865-5p	hsa-miR-6812-5p	hsa-miR-4642	hsa-miR-605-3p
chr9:86293356-86297981-	hsa-miR-5706	hsa-miR-6839-5p	hsa-miR-4782-5p	hsa-miR-378j	hsa-miR-876-5p
chrM:2227-2416+	hsa-miR-4675	hsa-miR-508-3p	hsa-miR-658	hsa-miR-765	hsa-miR-22-5p
chrX:122490083-122503429-	hsa-miR-6868-3p	hsa-miR-3667-3p	hsa-miR-205-5p	hsa-miR-1248	hsa-miR-3124-3p
chr13:29278080-29284980-	hsa-miR-6841-5p	hsa-miR-6165	hsa-miR-3652	hsa-miR-3619-5p	hsa-miR-4418
chr4:25128886-25160729-	hsa-miR-6858-3p	hsa-miR-532-3p	hsa-miR-4504	hsa-miR-1206	hsa-miR-4715-5p
chrX:133919916-133921563-	hsa-miR-3654	hsa-miR-378b	hsa-miR-378h	hsa-miR-378c	hsa-miR-378a-3p
chr14:74121550-74125659+	hsa-miR-6794-5p	hsa-miR-7151-5p	hsa-miR-1236-3p	hsa-miR-612	hsa-miR-6878-3p
chr6:41020004-41023738-	hsa-miR-4763-5p	hsa-miR-3065-3p	hsa-miR-4303	hsa-miR-296-5p	hsa-miR-1260a
chr12:64195871-64199184+	hsa-miR-5089-3p	hsa-miR-6744-3p	hsa-miR-4753-5p	hsa-miR-6839-3p	hsa-miR-4717-5p
chr9:116046595-116050544+	hsa-miR-1200	hsa-miR-542-3p	hsa-miR-3122	hsa-miR-3680-5p	hsa-miR-1277-3p
chr12:122723134-122724492-	hsa-miR-4301	hsa-miR-6733-3p	hsa-miR-1266-3p	hsa-miR-2054	hsa-miR-3941
chr3:121631868-121634540+	hsa-miR-515-5p	hsa-miR-519e-5p	hsa-miR-6831-5p	hsa-miR-3668	hsa-miR-6780a-3p
chr7:140402666-140404763+	hsa-miR-625-5p	hsa-miR-4779	hsa-miR-4796-5p	hsa-miR-6884-5p	hsa-miR-7851-3p
chr14:74398206-74398815+	hsa-miR-383-5p	hsa-miR-6806-3p	hsa-miR-5685	hsa-miR-3928-5p	hsa-miR-6760-5p
chr17:60061532-60064489-	hsa-miR-4260	hsa-miR-3974	hsa-miR-4534	hsa-miR-6126	hsa-miR-5699-3p
chrX:24545691-24549887+	hsa-miR-4660	hsa-miR-486-3p	hsa-miR-4505	hsa-miR-4681	hsa-miR-1264
chr11:10824577-10827594-	hsa-miR-4778-3p	hsa-miR-708-5p	hsa-miR-3186-5p	hsa-miR-3660	hsa-miR-517c-3p
chr11:11941889-11942041+	hsa-miR-5011-3p	hsa-miR-3974	hsa-miR-1298-5p	hsa-miR-425-3p	hsa-miR-202-5p
chr10:103557737-103567658-	hsa-miR-4448	hsa-miR-7114-5p	hsa-miR-5011-3p	hsa-miR-492	hsa-miR-642a-3p
chr17:35797839-35800763+	hsa-miR-4291	hsa-miR-192-3p	hsa-miR-197-5p	hsa-miR-761	hsa-miR-6510-5p
chr5:2839989-2840144+	hsa-miR-509-3-5p	hsa-miR-509-5p	hsa-miR-6849-3p	hsa-miR-661	hsa-miR-4418
chr5:143543675-143549529-	hsa-miR-1231	hsa-miR-576-3p	hsa-miR-492	hsa-miR-6842-3p	hsa-miR-4474-3p
chr11:43389317-43389469-	hsa-miR-6887-3p	hsa-miR-1912	hsa-miR-5008-3p	hsa-miR-7157-3p	hsa-miR-7111-3p
chr10:120810711-120816365-	hsa-miR-6875-3p	hsa-miR-532-3p	hsa-miR-6881-3p	hsa-miR-518e-3p	hsa-miR-8081
chr12:116674626-116675510-	hsa-miR-1285-5p	hsa-miR-503-5p	hsa-miR-762	hsa-miR-1587	hsa-miR-3620-5p
chr5:107806140-107806301+	hsa-miR-1236-3p	hsa-miR-877-3p	hsa-miR-3128	hsa-miR-4747-5p	hsa-miR-221-5p
chr16:4484385-4487486+	hsa-miR-3190-3p	hsa-miR-5588-5p	hsa-miR-450b-3p	hsa-miR-548s	hsa-miR-4533
chr17:15569237-15569387-	hsa-miR-5193	hsa-miR-6769b-3p	hsa-miR-3162-3p	hsa-miR-4756-3p	hsa-miR-4667-3p
chr2:136402949-136437894+	hsa-miR-449b-5p	hsa-miR-449a	hsa-miR-3692-5p	hsa-miR-34c-5p	hsa-miR-34a-5p
chr16:57242987-57250085+	hsa-miR-136-5p	hsa-miR-6742-5p	hsa-miR-6756-5p	hsa-miR-6796-5p	hsa-miR-4648
chr12:120195175-120198859-	hsa-miR-3925-3p	hsa-miR-5088-3p	hsa-miR-6886-3p	hsa-miR-1324	hsa-miR-593-3p
chr9:33414289-33414442+	hsa-miR-6751-3p	hsa-miR-6823-3p	hsa-miR-6791-3p	hsa-miR-1273g-3p	hsa-miR-6509-3p
chr2:29150435-29170027+	hsa-miR-6891-3p	hsa-miR-6072	hsa-miR-593-5p	hsa-miR-6881-3p	hsa-miR-6778-3p
chr15:40942499-40944303+	hsa-miR-6828-3p	hsa-miR-6844	hsa-miR-4268	hsa-miR-3925-3p	hsa-miR-4778-3p
chr17:46928451-46928990+	hsa-miR-4660	hsa-miR-1237-3p	hsa-miR-26b-3p	hsa-miR-4677-5p	hsa-miR-4540
chr10:89624211-89712016+	hsa-miR-1296-5p	hsa-miR-6795-5p	hsa-miR-6753-5p	hsa-miR-668-5p	hsa-miR-4703-5p
chr7:139459056-139469986-	hsa-miR-1908-3p	hsa-miR-506-5p	hsa-miR-6792-3p	hsa-miR-24-3p	hsa-miR-502-3p
chr3:169846472-169863309-	hsa-miR-138-5p	hsa-miR-765	hsa-miR-1291	hsa-miR-7847-3p	hsa-miR-7114-5p
chrX:147733520-147744289+	hsa-miR-378h	hsa-miR-378b	hsa-miR-203b-3p	hsa-miR-378c	hsa-miR-378e
chr3:196089165-196089558-	hsa-miR-6887-3p	hsa-miR-378h	hsa-miR-4778-3p	hsa-miR-2467-5p	hsa-miR-10b-3p
chr11:65198240-65211534+	hsa-miR-6825-5p	hsa-miR-1273g-3p	hsa-miR-6515-5p	hsa-miR-485-5p	hsa-miR-4794
chr18:77455225-77464917+	hsa-miR-502-5p	hsa-miR-210-3p	hsa-miR-6075	hsa-miR-3142	hsa-miR-3944-5p
chr3:127079319-127079469+	hsa-miR-3675-5p	hsa-miR-5193	hsa-miR-1260b	hsa-miR-4485-3p	hsa-miR-6889-3p
chr12:96691756-96694138-	hsa-miR-6883-3p	hsa-miR-1273g-3p	hsa-miR-1268b	hsa-miR-4720-5p	hsa-miR-1268a
chr21:40585407-40587288-	hsa-miR-4799-3p	hsa-miR-4720-5p	hsa-miR-101-5p	hsa-miR-4639-3p	hsa-miR-3152-3p
chr5:36211946-36227667-	hsa-miR-3622a-3p	hsa-miR-4473	hsa-miR-1202	hsa-miR-493-3p	hsa-miR-1184
chr8:38643194-38646337+	hsa-miR-4290	hsa-miR-1255b-2-3p	hsa-miR-4254	hsa-miR-1911-3p	hsa-miR-4722-5p
chr1:21231376-21268190-	hsa-miR-6766-5p	hsa-miR-4707-3p	hsa-miR-7851-3p	hsa-miR-1288-5p	hsa-miR-4701-3p
chr4:76573823-76580430-	hsa-miR-4279	hsa-miR-6865-5p	hsa-miR-6819-5p	hsa-miR-6812-5p	hsa-miR-203a-5p
chr4:99955381-99966461+	hsa-miR-4711-5p	hsa-miR-3681-5p	hsa-miR-10b-3p	hsa-miR-4327	hsa-miR-199a-3p
chr7:115750762-115752092-	hsa-miR-3149	hsa-miR-6809-3p	hsa-miR-217	hsa-miR-1302	hsa-miR-100-3p
chr7:37433425-37455277-	hsa-miR-324-3p	hsa-miR-1913	hsa-miR-6879-5p	hsa-miR-4436b-3p	hsa-miR-302a-3p
chr3:122821258-122825688+	hsa-miR-24-3p	hsa-miR-6851-3p	hsa-miR-8058	hsa-miR-2355-3p	hsa-miR-4437
chr21:38439562-38441924-	hsa-miR-4662a-5p	hsa-let-7b-5p	hsa-miR-3173-3p	hsa-let-7d-5p	hsa-let-7a-5p
chr11:78176922-78204241-	hsa-miR-3064-3p	hsa-miR-4524b-3p	hsa-miR-6125	hsa-miR-542-3p	hsa-miR-3156-5p
chrX:154448487-154464648+	hsa-miR-5586-5p	hsa-miR-4740-5p	hsa-miR-3128	hsa-miR-3144-5p	hsa-miR-200a-5p
chr4:6969031-7016284+	hsa-miR-1237-3p	hsa-miR-6876-3p	hsa-miR-4742-3p	hsa-miR-6752-3p	hsa-miR-6868-3p
chr2:27573181-27573499-	hsa-miR-1273h-5p	hsa-miR-5001-5p	hsa-miR-3692-5p	hsa-miR-4492	hsa-miR-762
chr16:304380-304680+	hsa-miR-1910-3p	hsa-miR-602	hsa-miR-608	hsa-miR-4757-5p	hsa-miR-4462
chr8:74585342-74601048+	hsa-miR-3136-5p	hsa-miR-192-3p	hsa-miR-4439	hsa-miR-6089	hsa-miR-1268a
chr7:105260647-105264714-	hsa-miR-608	hsa-miR-6756-3p	hsa-miR-7153-3p	hsa-miR-6848-5p	hsa-miR-6846-5p
chr3:15836730-15855816-	hsa-miR-6880-5p	hsa-miR-4327	hsa-miR-4473	hsa-miR-4443	hsa-miR-6780a-3p
chr10:94243012-94267962-	hsa-miR-8065	hsa-miR-3667-3p	hsa-miR-2278	hsa-miR-6878-3p	hsa-miR-6744-3p
chr3:52702514-52713742-	hsa-miR-3670	hsa-miR-3202	hsa-miR-18a-3p	hsa-miR-2861	hsa-miR-548al
chr8:25257427-25258582+	hsa-miR-3663-5p	hsa-miR-4524a-5p	hsa-miR-4524b-5p	hsa-miR-4790-5p	hsa-miR-127-3p
chr3:160131261-160137331+	hsa-miR-676-5p	hsa-miR-6809-3p	hsa-miR-6868-3p	hsa-miR-9-5p	hsa-miR-556-5p
chr14:104422001-104441890+	hsa-miR-96-5p	hsa-miR-6876-3p	hsa-miR-2053	hsa-miR-6764-5p	hsa-miR-6784-5p
chr2:24086251-24108699-	hsa-miR-4423-5p	hsa-miR-135a-5p	hsa-miR-2682-3p	hsa-miR-647	hsa-miR-4782-5p
chr2:61147176-61149134+	hsa-miR-6780a-5p	hsa-miR-1273h-5p	hsa-miR-30b-3p	hsa-miR-6779-5p	hsa-miR-3689b-3p
chr1:27267948-27268309+	hsa-miR-6743-3p	hsa-miR-1202	hsa-miR-4632-3p	hsa-miR-2682-3p	hsa-miR-1251-5p
chr15:50763830-50763992+	hsa-miR-5585-5p	hsa-miR-5192	hsa-miR-3607-3p	hsa-miR-3679-3p	hsa-miR-3126-3p
chr5:10377910-10378944+	hsa-miR-200b-3p	hsa-miR-3134	hsa-miR-429	hsa-miR-1179	hsa-miR-4801
chr17:20907515-20908303-	hsa-miR-3663-5p	hsa-miR-138-5p	hsa-miR-8069	hsa-miR-3620-5p	hsa-miR-616-3p
chr5:118417269-118456834+	hsa-miR-6867-5p	hsa-miR-4495	hsa-miR-6504-5p	hsa-miR-4755-3p	hsa-miR-3064-5p
chr2:17902207-17907736-	hsa-miR-205-5p	hsa-miR-6743-3p	hsa-miR-4524a-5p	hsa-miR-6828-3p	hsa-miR-6739-3p
chr14:97299804-97304154+	hsa-miR-18a-5p	hsa-miR-18b-5p	hsa-miR-7112-3p	hsa-miR-6791-3p	hsa-miR-4457
chr2:120684174-120702816+	hsa-miR-7-5p	hsa-miR-5699-3p	hsa-miR-450a-2-3p	hsa-miR-1293	hsa-miR-6740-5p
chr6:64337758-64337933-	hsa-miR-6888-3p	hsa-miR-4540	hsa-miR-6736-3p	hsa-miR-3618	hsa-miR-675-3p
chr17:1534670-1536008-	hsa-miR-7851-3p	hsa-miR-1827	hsa-miR-1285-3p	hsa-miR-1273g-3p	hsa-miR-4284
chr2:120677645-120692534+	hsa-miR-450a-2-3p	hsa-miR-4683	hsa-miR-4277	hsa-miR-7-5p	hsa-miR-5699-3p
chr20:34295042-34301018-	hsa-miR-4684-3p	hsa-miR-5047	hsa-miR-622	hsa-miR-1184	hsa-miR-3692-5p
chrM:3994-4168+	hsa-miR-1182	hsa-miR-193a-5p	hsa-miR-4270	hsa-miR-4739	hsa-miR-6754-5p
chr2:24521534-24523040-	hsa-miR-6882-3p	hsa-miR-6873-3p	hsa-miR-4790-5p	hsa-miR-3156-3p	hsa-miR-4677-5p
chr19:47998807-48006759-	hsa-miR-3925-3p	hsa-miR-6872-5p	hsa-miR-5691	hsa-miR-3665	hsa-miR-7704
chr1:1770629-1779968-	hsa-miR-6779-5p	hsa-miR-1273h-5p	hsa-miR-6780a-5p	hsa-miR-7703	hsa-miR-30b-3p
chr10:115636280-115668282+	hsa-miR-6876-3p	hsa-miR-5006-5p	hsa-miR-6073	hsa-miR-134-3p	hsa-miR-1262
chr17:60650576-60651771+	hsa-miR-6830-3p	hsa-miR-4722-5p	hsa-miR-3184-5p	hsa-miR-501-5p	hsa-miR-185-3p
chr4:39843568-39851272-	hsa-miR-508-5p	hsa-miR-3925-3p	hsa-miR-6779-5p	hsa-miR-4727-5p	hsa-miR-548an
chr3:186015210-186038496-	hsa-miR-516b-5p	hsa-miR-450a-5p	hsa-miR-3929	hsa-miR-660-3p	hsa-miR-4421
chr12:57011179-57020898-	hsa-miR-1268a	hsa-miR-1268b	hsa-miR-5685	hsa-miR-6743-5p	hsa-miR-4690-3p
chrY:21901414-21903743-	hsa-miR-6769a-5p	hsa-miR-450b-5p	hsa-miR-4717-3p	hsa-miR-6769b-5p	hsa-miR-139-3p
chr12:19407979-19410471+	hsa-miR-3928-5p	hsa-miR-5088-5p	hsa-miR-6806-3p	hsa-miR-127-5p	hsa-miR-6738-3p
chr12:49388882-49389037+	hsa-miR-211-5p	hsa-miR-221-5p	hsa-miR-204-5p	hsa-miR-6720-5p	hsa-miR-4642
chr22:19452725-19455526-	hsa-miR-5088-5p	hsa-miR-6765-3p	hsa-miR-3127-5p	hsa-miR-6855-5p	hsa-miR-6802-5p
chr12:51019759-51054102-	hsa-miR-6835-5p	hsa-miR-656-5p	hsa-miR-1827	hsa-miR-1304-5p	hsa-miR-4640-5p
chr9:79952171-79959197+	hsa-miR-588	hsa-miR-539-5p	hsa-miR-6736-3p	hsa-miR-3936	hsa-miR-3938
chr2:136402949-136433056+	hsa-miR-3692-5p	hsa-miR-760	hsa-miR-6865-5p	hsa-miR-4474-3p	hsa-miR-4498
chr9:33960824-34017187-	hsa-miR-4663	hsa-miR-4804-3p	hsa-miR-6873-3p	hsa-miR-144-3p	hsa-miR-6501-5p
chr14:95590533-95608085-	hsa-miR-5196-3p	hsa-miR-199b-5p	hsa-miR-3660	hsa-miR-199a-5p	hsa-miR-4526
chr7:24659671-24681487+	hsa-miR-3915	hsa-miR-1468-3p	hsa-miR-889-5p	hsa-miR-6738-3p	hsa-miR-3938
chr2:169404106-169417832+	hsa-miR-1228-5p	hsa-miR-6815-3p	hsa-miR-3653-5p	hsa-miR-4297	hsa-miR-25-5p
chr22:29120965-29121355-	hsa-miR-106a-3p	hsa-miR-301a-3p	hsa-miR-203a-5p	hsa-miR-130a-3p	hsa-miR-148b-3p
chr1:180022885-180023069+	hsa-miR-18a-3p	hsa-miR-5091	hsa-miR-6881-3p	hsa-miR-1911-3p	hsa-miR-4792
chr1:93070864-93091491-	hsa-miR-1273d	hsa-miR-6876-3p	hsa-miR-3977	hsa-miR-6884-3p	hsa-miR-152-5p
chr5:150112930-150121719-	hsa-miR-133a-5p	hsa-miR-3692-5p	hsa-miR-4490	hsa-miR-6867-5p	hsa-miR-4303
chr15:23333849-23356220-	hsa-miR-3202	hsa-miR-199b-5p	hsa-miR-4257	hsa-miR-193a-3p	hsa-miR-3612
chr5:131923254-131927726+	hsa-miR-136-5p	hsa-miR-29a-5p	hsa-miR-5195-3p	hsa-miR-4421	hsa-miR-103a-2-5p
chr21:46558213-46564616+	hsa-miR-4755-3p	hsa-miR-1273g-3p	hsa-miR-23a-5p	hsa-miR-3154	hsa-miR-510-5p
chr10:1123847-1124498+	hsa-miR-922	hsa-miR-5584-5p	hsa-miR-6888-5p	hsa-miR-6734-5p	hsa-miR-4753-3p
chr8:104412693-104420012-	hsa-miR-3938	hsa-miR-155-5p	hsa-miR-4538	hsa-miR-486-3p	hsa-miR-4677-5p
chr8:141828376-141889736-	hsa-miR-182-5p	hsa-miR-6886-5p	hsa-miR-6812-3p	hsa-miR-6769b-5p	hsa-miR-6765-5p
chr17:67251684-67252424-	hsa-miR-29b-3p	hsa-miR-29c-3p	hsa-miR-29a-3p	hsa-miR-432-3p	hsa-miR-3972
chr11:120335946-120338017+	hsa-miR-424-5p	hsa-miR-548aj-5p	hsa-miR-548g-5p	hsa-miR-548x-5p	hsa-miR-15b-5p
chr10:9719536-9719701+	hsa-miR-499b-3p	hsa-miR-3145-3p	hsa-miR-4776-3p	hsa-miR-4474-3p	hsa-miR-5590-5p
chr10:102703783-102710510+	hsa-miR-452-3p	hsa-miR-3185	hsa-miR-5588-5p	hsa-miR-3169	hsa-miR-302b-5p
chr17:27778473-27778698-	hsa-miR-761	hsa-miR-520a-5p	hsa-miR-4690-5p	hsa-miR-525-5p	hsa-miR-504-5p
chr18:19146107-19148055-	hsa-miR-939-5p	hsa-miR-3160-3p	hsa-miR-6838-5p	hsa-miR-3136-5p	hsa-miR-3150a-3p
chrX:118971720-118972490-	hsa-miR-6809-3p	hsa-miR-4753-3p	hsa-miR-642a-5p	hsa-miR-9-5p	hsa-miR-635
chr2:144244767-144245064+	hsa-miR-3678-3p	hsa-miR-7705	hsa-miR-3140-5p	hsa-miR-3155a	hsa-miR-3155b
chr15:94841430-94841959+	hsa-miR-892b	hsa-miR-637	hsa-miR-4269	hsa-miR-6762-5p	hsa-miR-572
chr4:83348343-83349599-	hsa-miR-450b-3p	hsa-miR-892b	hsa-miR-216b-3p	hsa-miR-143-5p	hsa-miR-4755-5p
chr1:11133991-11134383-	hsa-miR-1226-5p	hsa-miR-1246	hsa-miR-7843-5p	hsa-miR-4436b-3p	hsa-miR-6735-5p
chr12:27538414-27543172+	hsa-miR-4693-5p	hsa-miR-6881-3p	hsa-miR-3614-3p	hsa-miR-541-5p	hsa-miR-4259
chr8:48192450-48206619+	hsa-miR-548g-3p	hsa-miR-6877-3p	hsa-miR-6810-3p	hsa-miR-6819-3p	hsa-miR-769-5p
chr14:31163979-31177120+	hsa-miR-1182	hsa-miR-8065	hsa-miR-6891-3p	hsa-miR-6845-3p	hsa-miR-1915-5p
chr6:33638289-33651058+	hsa-miR-4707-5p	hsa-miR-6885-5p	hsa-miR-5787	hsa-miR-4723-3p	hsa-miR-328-5p
chr4:2659530-2692697+	hsa-miR-3605-5p	hsa-miR-3064-5p	hsa-miR-6504-5p	hsa-miR-4539	hsa-miR-1229-5p
chr1:162117708-162124266+	hsa-miR-4779	hsa-miR-5194	hsa-miR-6826-3p	hsa-miR-5193	hsa-miR-8057
chr10:53276813-53278888+	hsa-miR-6715b-3p	hsa-miR-3192-3p	hsa-miR-4666b	hsa-miR-6509-3p	hsa-miR-6775-5p
chr19:2137010-2138713-	hsa-miR-381-5p	hsa-miR-503-5p	hsa-miR-4646-5p	hsa-miR-323a-5p	hsa-miR-6126
chrX:109263580-109268798+	hsa-miR-3667-3p	hsa-miR-6762-3p	hsa-miR-6814-5p	hsa-miR-3674	hsa-miR-6740-3p
chr5:179012797-179016648+	hsa-miR-4635	hsa-miR-7156-5p	hsa-miR-7107-3p	hsa-miR-22-5p	hsa-miR-573
chr22:36690978-36698722-	hsa-miR-5193	hsa-miR-4268	hsa-miR-5001-3p	hsa-miR-212-5p	hsa-miR-885-3p
chr15:80365608-80367657+	hsa-miR-3692-5p	hsa-miR-138-5p	hsa-miR-135b-5p	hsa-miR-421	hsa-miR-3651
chr3:129579783-129599405-	hsa-miR-1273h-5p	hsa-miR-6780a-5p	hsa-miR-30b-3p	hsa-miR-3689c	hsa-miR-3689b-3p
chr8:92030618-92036594-	hsa-miR-4259	hsa-miR-22-5p	hsa-miR-3689d	hsa-miR-193b-5p	hsa-miR-371b-3p
chr2:9017160-9098771-	hsa-miR-2861	hsa-miR-3666	hsa-miR-130b-3p	hsa-miR-892a	hsa-miR-34a-3p
chr2:25830105-25830751-	hsa-miR-6844	hsa-miR-1273d	hsa-miR-3674	hsa-miR-4699-5p	hsa-miR-6806-3p
chr6:90045021-90053475-	hsa-miR-637	hsa-miR-514a-5p	hsa-miR-4700-3p	hsa-miR-589-5p	hsa-miR-3124-3p
chr11:65267893-65268203+	hsa-miR-412-3p	hsa-miR-6754-3p	hsa-miR-3667-3p	hsa-miR-197-3p	hsa-miR-6746-3p
chr2:15542292-15618413-	hsa-miR-6780a-3p	hsa-miR-107	hsa-miR-103a-3p	hsa-miR-513a-5p	hsa-miR-877-3p
chr2:99804640-99812219+	hsa-miR-218-5p	hsa-miR-1299	hsa-miR-1273g-3p	hsa-miR-105-5p	hsa-miR-125a-3p
chr3:50142982-50145002+	hsa-miR-6894-5p	hsa-miR-512-3p	hsa-miR-7107-3p	hsa-miR-450b-5p	hsa-miR-2467-3p
chr15:59970110-59974713-	hsa-miR-199a-5p	hsa-miR-1266-3p	hsa-miR-199b-5p	hsa-miR-4661-3p	hsa-miR-4490
chr2:39107320-39108719+	hsa-miR-455-3p	hsa-miR-4768-5p	hsa-miR-136-5p	hsa-miR-3189-5p	hsa-miR-4704-3p
chr22:30374431-30375041+	hsa-miR-6830-5p	hsa-miR-7157-3p	hsa-miR-1254	hsa-miR-3914	hsa-miR-3611
chr12:104370696-104374740+	hsa-miR-185-3p	hsa-miR-4799-3p	hsa-miR-6817-5p	hsa-miR-3591-3p	hsa-miR-553
chr3:196857398-196869639-	hsa-miR-103a-2-5p	hsa-miR-6793-5p	hsa-miR-6759-5p	hsa-miR-1306-5p	hsa-miR-4776-3p
chr6:7152846-7189555+	hsa-miR-5190	hsa-miR-1268b	hsa-miR-1268a	hsa-miR-588	hsa-miR-4701-5p
chr12:69210592-69222711+	hsa-miR-4755-3p	hsa-miR-6867-3p	hsa-miR-4777-5p	hsa-miR-6888-3p	hsa-miR-338-5p
chr10:38599005-38599160-	hsa-miR-1267	hsa-miR-942-3p	hsa-miR-548s	hsa-miR-3926	hsa-miR-1287-5p
chr10:121547926-121548096+	hsa-miR-3615	hsa-miR-1236-3p	hsa-miR-6791-3p	hsa-miR-6893-3p	hsa-miR-7113-3p
chr14:58740697-58740853-	hsa-miR-6835-3p	hsa-miR-133a-5p	hsa-miR-7702	hsa-miR-3161	hsa-miR-19b-1-5p
chr12:121747773-121756227+	hsa-miR-629-3p	hsa-miR-6878-3p	hsa-miR-6747-3p	hsa-miR-7847-3p	hsa-miR-504-3p
chr3:87871158-87883206+	hsa-miR-1273h-5p	hsa-miR-6780a-5p	hsa-miR-6779-5p	hsa-miR-4536-5p	hsa-miR-30b-3p
chr17:62627521-62627671+	hsa-miR-378f	hsa-miR-6507-3p	hsa-miR-4723-3p	hsa-miR-6895-3p	hsa-miR-3183
chr7:148451092-148457588+	hsa-miR-504-5p	hsa-miR-6817-3p	hsa-miR-1285-3p	hsa-miR-3134	hsa-miR-6089
chr4:13886336-13886502+	hsa-miR-6885-3p	hsa-miR-4496	hsa-miR-769-5p	hsa-miR-4790-3p	hsa-miR-4684-5p
chr5:112901590-112920176+	hsa-miR-1184	hsa-miR-6772-5p	hsa-miR-4686	hsa-miR-1273f	hsa-miR-4509
chr18:76966937-76974038+	hsa-miR-101-3p	hsa-miR-6853-3p	hsa-miR-4664-3p	hsa-miR-124-5p	hsa-miR-4728-3p
chr12:89853415-89866052-	hsa-miR-6841-5p	hsa-miR-191-5p	hsa-miR-6794-5p	hsa-miR-1229-5p	hsa-miR-6798-5p
chr10:13167785-13168039+	hsa-miR-5700	hsa-miR-6802-3p	hsa-miR-586	hsa-miR-6778-3p	hsa-miR-670-3p
chr4:148968043-148968202+	hsa-miR-483-5p	hsa-miR-665	hsa-miR-3692-5p	hsa-miR-6825-5p	hsa-miR-5008-5p
chr19:5047487-5071070+	hsa-miR-196a-5p	hsa-miR-5006-5p	hsa-miR-196b-5p	hsa-miR-4755-3p	hsa-miR-1268a
chr5:169108734-169111354+	hsa-miR-6804-3p	hsa-miR-4317	hsa-miR-6817-5p	hsa-miR-1910-3p	hsa-miR-4784
chr17:49133773-49157065-	hsa-miR-586	hsa-miR-7107-3p	hsa-miR-5700	hsa-miR-4744	hsa-miR-6868-3p
chr15:76205544-76209735+	hsa-miR-513c-5p	hsa-miR-4701-5p	hsa-miR-1343-3p	hsa-miR-5584-3p	hsa-miR-6734-5p
chr4:54306749-54319300+	hsa-miR-6880-5p	hsa-miR-1273f	hsa-miR-7847-3p	hsa-miR-6081	hsa-miR-130b-5p
chr5:63621013-63626233+	hsa-miR-544a	hsa-miR-4778-5p	hsa-miR-5088-5p	hsa-miR-3167	hsa-miR-6510-5p
chr3:121438493-121449820-	hsa-miR-4254	hsa-miR-378g	hsa-miR-6811-3p	hsa-miR-3194-3p	hsa-miR-1236-3p
chr10:75227311-75239275-	hsa-miR-6732-3p	hsa-miR-3665	hsa-miR-203a-5p	hsa-miR-4764-5p	hsa-miR-3674
chr1:78201741-78207433-	hsa-miR-8058	hsa-miR-3138	hsa-miR-410-5p	hsa-miR-4657	hsa-miR-4668-3p
chr14:50130033-50133131-	hsa-miR-5088-5p	hsa-miR-382-3p	hsa-miR-601	hsa-miR-6748-5p	hsa-miR-4437
chr8:38099768-38105353+	hsa-miR-144-5p	hsa-miR-550a-5p	hsa-miR-550a-3-5p	hsa-miR-616-3p	hsa-miR-7848-3p
chr11:116400031-116400200+	hsa-miR-6847-3p	hsa-miR-6892-3p	hsa-miR-8054	hsa-miR-6512-3p	hsa-miR-5580-3p
chr19:48653020-48653467-	hsa-miR-6769a-3p	hsa-miR-1976	hsa-miR-4706	hsa-miR-6889-5p	hsa-miR-1225-3p
chr14:70659086-70659238+	hsa-miR-6875-3p	hsa-miR-3620-5p	hsa-miR-4474-3p	hsa-miR-4672	hsa-miR-4656
chr5:74696030-74706928-	hsa-miR-4778-3p	hsa-miR-421	hsa-miR-148b-5p	hsa-miR-215-3p	hsa-miR-1229-3p
chr1:35854511-35854683+	hsa-miR-1236-3p	hsa-miR-30c-2-3p	hsa-miR-30c-1-3p	hsa-miR-654-3p	hsa-miR-3607-3p
chr2:100078958-100081447-	hsa-miR-376c-3p	hsa-miR-4524a-5p	hsa-miR-7977	hsa-miR-6838-5p	hsa-miR-212-5p
chr2:230666968-230672580-	hsa-miR-370-3p	hsa-miR-4714-5p	hsa-miR-4522	hsa-miR-6893-3p	hsa-miR-4752
chr15:56216844-56258744-	hsa-miR-4661-5p	hsa-miR-1248	hsa-miR-146a-3p	hsa-miR-1250-5p	hsa-miR-4511
chr13:33261271-33271039+	hsa-miR-4766-3p	hsa-miR-19b-1-5p	hsa-miR-3914	hsa-miR-3928-3p	hsa-miR-19b-2-5p
chr11:118650341-118651893-	hsa-miR-370-5p	hsa-miR-6129	hsa-miR-6515-5p	hsa-miR-7977	hsa-miR-7847-3p
chr2:111037183-111041381+	hsa-miR-885-3p	hsa-miR-3936	hsa-miR-4281	hsa-miR-4762-5p	hsa-miR-6770-3p
chr2:198367763-198368054+	hsa-miR-2276-3p	hsa-miR-30c-2-3p	hsa-miR-329-3p	hsa-miR-362-3p	hsa-miR-30c-1-3p
chr16:47694417-47703328+	hsa-miR-3916	hsa-miR-6861-5p	hsa-miR-6796-5p	hsa-miR-1299	hsa-miR-642a-5p
chr4:39850471-39874764-	hsa-miR-4653-3p	hsa-miR-382-5p	hsa-miR-5096	hsa-miR-6779-5p	hsa-miR-4742-5p
chr10:20432224-20453496+	hsa-miR-1254	hsa-miR-653-3p	hsa-miR-656-5p	hsa-miR-3138	hsa-miR-450b-3p
chr3:134251620-134270854+	hsa-miR-6738-3p	hsa-miR-6728-3p	hsa-miR-873-3p	hsa-miR-29c-5p	hsa-miR-6780a-3p
chr11:65267954-65268137+	hsa-miR-412-3p	hsa-miR-6754-3p	hsa-miR-3667-3p	hsa-miR-7703	hsa-miR-7162-5p
chr17:35800606-35804870+	hsa-miR-3065-5p	hsa-miR-544a	hsa-miR-197-5p	hsa-miR-761	hsa-miR-6510-5p
chr20:8737693-8746005+	hsa-miR-142-3p	hsa-miR-7107-3p	hsa-miR-3614-5p	hsa-miR-140-5p	hsa-miR-6741-3p
chr7:148809229-148815440-	hsa-miR-2355-3p	hsa-miR-1248	hsa-miR-1179	hsa-miR-4727-5p	hsa-miR-6780b-3p
chr14:24679554-24679974-	hsa-miR-4704-5p	hsa-miR-6870-3p	hsa-miR-5196-3p	hsa-miR-766-3p	hsa-miR-6783-3p
chr5:94275788-94353188-	hsa-miR-6881-5p	hsa-miR-188-3p	hsa-miR-4663	hsa-miR-6846-3p	hsa-miR-134-3p
chr9:88211277-88248289-	hsa-miR-4502	hsa-miR-3142	hsa-miR-7153-3p	hsa-miR-181a-2-3p	hsa-miR-6765-3p
chr5:70757644-70759944+	hsa-miR-301a-5p	hsa-miR-6878-3p	hsa-miR-4456	hsa-miR-3119	hsa-miR-6744-3p
chr3:47777524-47779600-	hsa-let-7b-5p	hsa-let-7i-5p	hsa-miR-4458	hsa-let-7c-5p	hsa-miR-1288-5p
chr6:13305294-13321327-	hsa-miR-4727-5p	hsa-miR-544b	hsa-miR-4691-5p	hsa-miR-615-5p	hsa-miR-942-5p
chr11:77433733-77436744-	hsa-miR-4474-5p	hsa-miR-6739-3p	hsa-miR-365a-5p	hsa-miR-365b-5p	hsa-miR-6878-3p
chr13:20315705-20333558-	hsa-miR-4682	hsa-miR-3191-5p	hsa-miR-6738-3p	hsa-miR-1206	hsa-miR-7161-3p
chr3:47079156-47088111-	hsa-miR-6780a-5p	hsa-miR-3689c	hsa-miR-3689b-3p	hsa-miR-1273h-5p	hsa-miR-3689a-3p
chr2:48223855-48232089-	hsa-miR-4677-5p	hsa-miR-26a-2-3p	hsa-miR-450a-1-3p	hsa-miR-1252-5p	hsa-miR-16-1-3p
chr15:102241289-102242588-	hsa-miR-204-3p	hsa-miR-2115-5p	hsa-miR-6780a-3p	hsa-miR-5196-5p	hsa-miR-6881-3p
chr9:35657752-35658017-	hsa-miR-6825-5p	hsa-miR-2277-5p	hsa-miR-6786-3p	hsa-miR-7106-5p	hsa-miR-106b-3p
chr11:128933834-128936670-	hsa-miR-4436b-5p	hsa-miR-378h	hsa-miR-378c	hsa-miR-378e	hsa-miR-378a-3p
chr7:72040466-72040704-	hsa-miR-581	hsa-miR-1271-5p	hsa-miR-6739-3p	hsa-miR-1255b-5p	hsa-miR-3190-5p
chr8:61496767-61497374+	hsa-miR-323b-5p	hsa-miR-3923	hsa-miR-6893-3p	hsa-miR-410-5p	hsa-miR-3605-3p
chr5:169485487-169494690+	hsa-miR-6825-5p	hsa-miR-4651	hsa-miR-608	hsa-miR-6846-3p	hsa-miR-185-3p
chr15:28857205-28878886+	hsa-miR-6500-5p	hsa-miR-3202	hsa-miR-199b-5p	hsa-miR-193a-3p	hsa-miR-218-2-3p
chr7:151052854-151053308+	hsa-miR-3909	hsa-miR-877-3p	hsa-miR-6878-3p	hsa-miR-4723-3p	hsa-miR-7111-3p
chr12:14587271-14589185+	hsa-miR-4778-3p	hsa-miR-6738-3p	hsa-miR-5687	hsa-miR-6830-3p	hsa-miR-3912-5p
chr13:96485181-96511929-	hsa-miR-3915	hsa-miR-3150a-3p	hsa-miR-5591-3p	hsa-miR-450a-2-3p	hsa-miR-6780a-3p
chr1:21268578-21276601-	hsa-miR-8089	hsa-miR-8082	hsa-miR-548g-3p	hsa-miR-5094	hsa-miR-4667-5p
chr7:104714066-104731761+	hsa-miR-204-5p	hsa-miR-211-5p	hsa-miR-4459	hsa-miR-2276-5p	hsa-miR-218-1-3p
chr10:70056643-70066663-	hsa-miR-6841-3p	hsa-miR-4695-5p	hsa-miR-1257	hsa-miR-623	hsa-miR-502-5p
chr3:124374448-124376650+	hsa-miR-145-5p	hsa-miR-5195-3p	hsa-miR-6515-3p	hsa-miR-4687-5p	hsa-miR-7843-3p
chr2:33525518-33572577+	hsa-miR-216a-3p	hsa-miR-6796-5p	hsa-miR-3158-5p	hsa-miR-3687	hsa-miR-3183
chr20:21321359-21327188+	hsa-miR-139-3p	hsa-miR-6777-5p	hsa-miR-6773-3p	hsa-miR-6827-5p	hsa-miR-6762-3p
chr3:37369033-37388787+	hsa-miR-3940-5p	hsa-miR-4507	hsa-miR-888-5p	hsa-miR-574-5p	hsa-miR-519b-3p
chr3:32574478-32587457-	hsa-miR-505-3p	hsa-miR-4477b	hsa-miR-370-3p	hsa-miR-4791	hsa-miR-6763-5p
chr7:128214774-128220148+	hsa-miR-762	hsa-miR-515-3p	hsa-miR-3679-3p	hsa-miR-3973	hsa-miR-34b-3p
chr5:86627165-86642541+	hsa-miR-452-3p	hsa-miR-504-5p	hsa-miR-664a-5p	hsa-miR-6733-3p	hsa-miR-676-5p
chr6:13632602-13659064-	hsa-miR-376c-5p	hsa-miR-376b-5p	hsa-miR-4660	hsa-miR-4769-3p	hsa-miR-584-3p
chr2:32362178-32372327+	hsa-miR-370-5p	hsa-miR-6754-3p	hsa-miR-4503	hsa-miR-412-3p	hsa-miR-6078
chr16:22319469-22320831+	hsa-miR-6855-5p	hsa-miR-5572	hsa-miR-204-3p	hsa-miR-4646-5p	hsa-miR-493-3p
chr17:18454820-18498175-	hsa-miR-4320	hsa-miR-10b-3p	hsa-miR-1267	hsa-miR-629-3p	hsa-miR-6821-3p
chr11:47380395-47397280-	hsa-miR-608	hsa-miR-4651	hsa-miR-762	hsa-miR-1538	hsa-miR-6743-3p
chr3:127393234-127393443+	hsa-miR-6736-3p	hsa-miR-342-5p	hsa-miR-6842-5p	hsa-miR-6752-5p	hsa-miR-1911-5p
chr11:85685751-85742653-	hsa-miR-361-3p	hsa-miR-370-3p	hsa-miR-6769a-3p	hsa-miR-4720-3p	hsa-miR-1244
chr8:90955481-90960120-	hsa-miR-147a	hsa-miR-1245a	hsa-miR-4501	hsa-miR-6874-3p	hsa-miR-4742-3p
chr10:53035373-53041922+	hsa-miR-5589-3p	hsa-miR-3667-5p	hsa-miR-3944-5p	hsa-miR-130b-3p	hsa-miR-4437
chr20:31292242-31292706-	hsa-miR-3156-3p	hsa-miR-3145-5p	hsa-miR-4256	hsa-miR-556-5p	hsa-miR-4487
chr2:58285487-58287336+	hsa-miR-22-3p	hsa-miR-581	hsa-miR-1270	hsa-miR-556-5p	hsa-miR-33a-5p
chr20:3300209-3303343-	hsa-miR-642b-3p	hsa-miR-642a-3p	hsa-miR-6778-3p	hsa-miR-425-5p	hsa-miR-6780b-5p
chr18:48584495-48584826+	hsa-miR-1293	hsa-miR-3196	hsa-miR-512-3p	hsa-miR-7976	hsa-miR-6504-5p
chr5:137089249-137089497-	hsa-miR-875-3p	hsa-miR-5092	hsa-miR-4288	hsa-miR-632	hsa-miR-1299
chr7:66458204-66458404-	hsa-miR-8057	hsa-miR-3925-3p	hsa-miR-6830-3p	hsa-miR-106a-3p	hsa-miR-6848-3p
chr12:65700643-65702435+	hsa-miR-761	hsa-miR-149-5p	hsa-miR-486-5p	hsa-miR-5580-5p	hsa-miR-3126-3p
chr19:38631824-38633350+	hsa-miR-6781-5p	hsa-miR-4655-5p	hsa-miR-6862-5p	hsa-miR-4253	hsa-miR-3936
chr9:114351544-114356547-	hsa-miR-3974	hsa-miR-223-3p	hsa-miR-582-3p	hsa-miR-4713-3p	hsa-miR-647
chr13:113460527-113465040+	hsa-miR-632	hsa-miR-1197	hsa-miR-1256	hsa-miR-4288	hsa-miR-10a-5p
chr16:11868092-11873219-	hsa-miR-4691-5p	hsa-miR-5588-5p	hsa-miR-141-5p	hsa-miR-6792-3p	hsa-miR-4799-3p
chr2:2744264-2744443-	hsa-miR-4695-5p	hsa-miR-4534	hsa-miR-765	hsa-miR-8082	hsa-miR-3663-3p
chr6:149833291-149846345-	hsa-miR-4778-3p	hsa-miR-4668-3p	hsa-miR-6839-3p	hsa-miR-6891-3p	hsa-miR-215-3p
chr1:71895540-71895695+	hsa-miR-4763-3p	hsa-miR-5193	hsa-miR-1207-5p	hsa-miR-4251	hsa-miR-6722-3p
chr12:133522207-133524856-	hsa-miR-525-5p	hsa-miR-6890-3p	hsa-miR-6820-3p	hsa-miR-367-3p	hsa-miR-520a-5p
chrX:10046839-10084547+	hsa-miR-5193	hsa-miR-4435	hsa-miR-6815-3p	hsa-miR-4785	hsa-miR-1539
chr6:47471016-47472494+	hsa-miR-125b-2-3p	hsa-miR-1183	hsa-miR-214-3p	hsa-miR-23c	hsa-miR-4530
chr2:61295984-61297635+	hsa-miR-4673	hsa-miR-514a-5p	hsa-miR-648	hsa-miR-6715b-5p	hsa-miR-5092
chr1:168034828-168037701+	hsa-miR-6884-5p	hsa-miR-105-5p	hsa-miR-485-5p	hsa-miR-3652	hsa-miR-34b-5p
chrM:14005-14277-	hsa-miR-7111-3p	hsa-miR-3679-3p	hsa-miR-4723-3p	hsa-miR-3156-3p	hsa-miR-130b-5p
chr16:2666601-2683837-	hsa-miR-4660	hsa-miR-4680-5p	hsa-miR-133a-5p	hsa-miR-657	hsa-miR-4713-5p
chr9:134305477-134314448+	hsa-miR-544a	hsa-miR-1247-5p	hsa-miR-941	hsa-miR-4524a-3p	hsa-miR-5699-5p
chr10:94406486-94407513-	hsa-miR-4460	hsa-miR-526b-3p	hsa-miR-520c-3p	hsa-miR-520b	hsa-miR-3657
chr15:22541491-22541656+	hsa-miR-6846-5p	hsa-miR-4498	hsa-miR-6848-5p	hsa-miR-6852-5p	hsa-miR-5001-5p
chr20:34302107-34320057-	hsa-miR-6760-3p	hsa-miR-138-1-3p	hsa-miR-425-3p	hsa-miR-183-5p	hsa-miR-6841-3p
chr2:160602281-160602448+	hsa-miR-640	hsa-miR-3125	hsa-miR-6845-3p	hsa-miR-3183	hsa-miR-519d-5p
chr3:27730857-27731009-	hsa-miR-6740-5p	hsa-miR-4739	hsa-miR-765	hsa-miR-6788-5p	hsa-miR-4756-5p
chr11:120310838-120316173+	hsa-miR-567	hsa-miR-518c-5p	hsa-miR-8067	hsa-miR-624-5p	hsa-miR-6830-5p
chr9:102988344-102992109+	hsa-miR-3614-5p	hsa-miR-4733-5p	hsa-miR-6806-5p	hsa-miR-5088-5p	hsa-miR-1266-5p
chr5:70337349-70338111-	hsa-miR-134-3p	hsa-miR-1296-3p	hsa-miR-1343-5p	hsa-miR-548ao-3p	hsa-miR-939-5p
chr11:122563985-122580182+	hsa-miR-5095	hsa-miR-7151-3p	hsa-miR-504-3p	hsa-miR-500b-3p	hsa-miR-5006-5p
chr1:62165947-62166697-	hsa-miR-199b-5p	hsa-miR-3605-5p	hsa-miR-199a-5p	hsa-miR-6846-5p	hsa-miR-6764-5p
chr8:62479727-62557191-	hsa-miR-5706	hsa-miR-653-3p	hsa-miR-767-3p	hsa-miR-4527	hsa-miR-4456
chr17:30320884-30321740+	hsa-miR-5682	hsa-miR-7156-5p	hsa-miR-548e-5p	hsa-miR-505-5p	hsa-miR-3682-3p
chr12:43925839-43925998-	hsa-miR-3158-5p	hsa-miR-4474-3p	hsa-miR-6808-3p	hsa-miR-1264	hsa-miR-5001-3p
chr6:14785181-14785331+	hsa-miR-4690-5p	hsa-miR-4486	hsa-miR-484	hsa-miR-145-3p
chrX:96167327-96200590+	hsa-miR-2117	hsa-miR-616-3p	hsa-miR-16-2-3p	hsa-miR-6844	hsa-miR-195-3p
chr9:123886209-123898260+	hsa-miR-6870-3p	hsa-miR-1236-3p	hsa-miR-544a	hsa-miR-3158-3p	hsa-miR-6854-5p
chr20:57009658-57016139+	hsa-miR-6877-3p	hsa-miR-6819-3p	hsa-miR-3128	hsa-miR-4743-3p	hsa-miR-223-3p
chr14:39620950-39628754-	hsa-miR-362-5p	hsa-miR-6771-3p	hsa-miR-6516-5p	hsa-miR-4646-3p	hsa-miR-4433b-5p
chr18:3163231-3164437-	hsa-miR-5095	hsa-miR-504-3p	hsa-miR-646	hsa-miR-500b-3p	hsa-miR-1273f
chr4:104053850-104084710-	hsa-miR-18b-5p	hsa-miR-18a-5p	hsa-miR-4735-3p	hsa-miR-3124-3p	hsa-miR-544a
chr11:117030650-117031977+	hsa-miR-3925-3p	hsa-miR-767-5p	hsa-miR-20a-3p	hsa-miR-152-3p	hsa-miR-3198
chr21:34985844-34994374-	hsa-miR-1182	hsa-miR-2115-5p	hsa-miR-6833-3p	hsa-miR-138-1-3p	hsa-miR-150-5p
chr4:76711303-76711950+	hsa-miR-6769a-5p	hsa-miR-18a-5p	hsa-miR-18b-5p	hsa-miR-6769b-5p	hsa-miR-5683
chr10:27356086-27368090-	hsa-miR-129-5p	hsa-miR-1302	hsa-miR-1255b-5p	hsa-miR-5196-5p	hsa-miR-205-5p
chr9:100092436-100117290+	hsa-miR-5193	hsa-miR-6499-3p	hsa-miR-3913-3p	hsa-miR-1236-3p	hsa-miR-6740-3p
chr22:31491289-31493324+	hsa-miR-7974	hsa-miR-4466	hsa-miR-339-3p	hsa-miR-3150b-3p	hsa-miR-767-3p
chr3:3182194-3186394-	hsa-miR-578	hsa-miR-1285-3p	hsa-miR-1273h-5p	hsa-miR-1268b	hsa-miR-1268a
chr1:247302018-247323115-	hsa-miR-6747-3p	hsa-miR-147a	hsa-miR-520g-3p	hsa-miR-520h	hsa-miR-2909
chr2:9419446-9463379+	hsa-miR-7706	hsa-miR-4747-5p	hsa-miR-3127-3p	hsa-miR-661	hsa-miR-5196-5p
chr8:131300497-131302384-	hsa-miR-585-5p	hsa-miR-1273a	hsa-miR-1273h-5p	hsa-miR-6510-5p	hsa-miR-3160-3p
chr15:42556288-42560230-	hsa-miR-3942-3p	hsa-miR-7109-3p	hsa-miR-509-5p	hsa-miR-509-3-5p	hsa-miR-6738-3p
chr1:112237963-112240119+	hsa-miR-8065	hsa-miR-3160-5p
chr3:37132958-37138151-	hsa-miR-6511a-5p	hsa-miR-6769a-3p	hsa-miR-1910-3p	hsa-miR-4685-3p	hsa-miR-493-3p
chr2:11389787-11393479-	hsa-miR-6085	hsa-miR-6511a-5p	hsa-miR-1910-3p	hsa-miR-6875-3p	hsa-miR-7851-3p
chr8:30034642-30038146+	hsa-miR-3130-3p	hsa-miR-4518	hsa-miR-7156-3p	hsa-miR-6738-3p	hsa-miR-192-3p
chr4:103578839-103611928-	hsa-miR-4722-3p	hsa-miR-5193	hsa-miR-3169	hsa-miR-6727-3p	hsa-miR-4540
chr5:67550147-67553170+	hsa-miR-6892-3p	hsa-miR-1268b	hsa-miR-1268a	hsa-miR-433-5p	hsa-miR-3677-5p
chr19:41135711-41135885-	hsa-miR-6895-3p	hsa-miR-6817-3p	hsa-miR-3691-3p	hsa-miR-6843-3p	hsa-miR-6846-3p
chr15:79748440-79750787+	hsa-miR-874-3p	hsa-miR-493-3p	hsa-miR-3681-3p	hsa-miR-4655-5p	hsa-miR-6735-3p
chr6:6174813-6251162-	hsa-miR-6821-3p	hsa-miR-4753-3p	hsa-miR-4735-3p	hsa-miR-4515	hsa-miR-18a-5p
chr5:31483661-31486669-	hsa-miR-6774-5p	hsa-miR-129-1-3p	hsa-miR-129-2-3p	hsa-miR-4427	hsa-miR-377-3p
chr1:17972538-17972710+	hsa-miR-6865-5p	hsa-miR-941	hsa-miR-6815-5p	hsa-miR-7150	hsa-miR-524-3p
chr1:21212694-21231464-	hsa-miR-149-5p	hsa-miR-5001-3p	hsa-miR-6738-3p	hsa-miR-6875-3p	hsa-miR-7151-3p
chr5:40775512-40777688-	hsa-miR-3685	hsa-miR-152-5p	hsa-miR-1200	hsa-miR-660-3p	hsa-miR-4329
chr7:5680781-5681002-	hsa-miR-3614-3p	hsa-miR-5189-5p	hsa-miR-1285-3p	hsa-miR-6860	hsa-miR-3187-5p
chr7:33059247-33066527-	hsa-miR-3607-5p	hsa-miR-181d-5p	hsa-miR-3161	hsa-miR-4268	hsa-miR-6507-3p
chr13:79945080-79946065-	hsa-miR-6838-3p	hsa-miR-6825-5p	hsa-miR-4300	hsa-miR-6763-5p	hsa-miR-4700-5p
chr3:15793257-15836813-	hsa-miR-544a	hsa-miR-6876-3p	hsa-miR-1251-5p	hsa-miR-5684	hsa-miR-4790-5p
chr2:190442945-190443198-	hsa-miR-3121-5p	hsa-miR-507	hsa-miR-365a-5p	hsa-miR-6881-3p	hsa-miR-4648
chr20:39690034-39709880+	hsa-miR-1248	hsa-miR-135a-5p	hsa-miR-6881-3p	hsa-miR-8071	hsa-miR-5009-5p
chrM:14922-15491-	hsa-miR-1306-5p	hsa-miR-424-5p	hsa-miR-4684-5p	hsa-miR-3184-5p	hsa-miR-15b-5p
chr12:27521195-27543172+	hsa-miR-215-3p	hsa-miR-188-3p	hsa-miR-4450	hsa-miR-4693-5p	hsa-miR-6881-3p
chr17:35979813-35981565-	hsa-miR-1269b	hsa-miR-1269a	hsa-miR-6817-3p	hsa-miR-135b-5p	hsa-miR-135a-5p
chr20:50090602-50092104-	hsa-miR-5095	hsa-miR-619-5p	hsa-miR-6810-3p	hsa-miR-8089	hsa-miR-6835-5p
chr1:164648085-164648623+	hsa-miR-182-5p	hsa-miR-6757-3p	hsa-miR-4797-3p	hsa-miR-642a-5p	hsa-miR-6780b-5p
chr8:53586405-53596573-	hsa-miR-3187-3p	hsa-miR-7156-3p	hsa-miR-101-3p	hsa-miR-1226-3p	hsa-miR-4691-5p
chr14:76330010-76368567+	hsa-miR-3064-5p	hsa-miR-6504-5p	hsa-miR-6886-3p	hsa-miR-6851-5p	hsa-miR-6803-5p
chr4:77977115-77977476-	hsa-miR-141-5p	hsa-miR-3611	hsa-miR-192-3p	hsa-miR-6833-3p	hsa-miR-616-5p
chr1:32653555-32653725+	hsa-miR-708-5p	hsa-miR-149-5p	hsa-miR-4726-5p	hsa-miR-760	hsa-miR-4734
chr4:39915231-39927553-	hsa-miR-3065-3p	hsa-miR-141-5p	hsa-miR-4317	hsa-miR-6884-3p	hsa-miR-4733-3p
chr2:15735269-15735677+	hsa-miR-3116	hsa-miR-4259	hsa-miR-7106-5p	hsa-miR-6779-5p	hsa-miR-1236-3p
chr6:163876311-163938797+	hsa-miR-6885-5p	hsa-miR-328-5p	hsa-miR-517c-3p	hsa-miR-517b-3p	hsa-miR-517a-3p
chr5:41749629-41794180-	hsa-miR-563	hsa-miR-211-5p	hsa-miR-4726-3p	hsa-miR-5682	hsa-miR-5006-3p
chr7:139056133-139083443+	hsa-miR-3664-5p	hsa-miR-4677-5p	hsa-miR-5009-5p	hsa-miR-5695	hsa-miR-1238-5p
chr11:46860934-46861098-	hsa-miR-520a-5p	hsa-miR-548bb-3p	hsa-miR-508-5p	hsa-miR-548h-3p	hsa-miR-548z
chr13:21732061-21746820-	hsa-miR-1299	hsa-miR-4752	hsa-miR-6515-5p	hsa-miR-4498	hsa-miR-3974
chr11:75715049-75718665+	hsa-miR-6854-5p	hsa-miR-483-3p	hsa-miR-6868-3p	hsa-miR-4753-3p	hsa-miR-516b-5p
chr22:47370186-47393605+	hsa-miR-4703-3p	hsa-miR-664b-3p	hsa-miR-3147	hsa-miR-6847-3p	hsa-miR-3140-5p
chr12:102128705-102131076-	hsa-miR-4312	hsa-miR-130b-5p	hsa-miR-6802-3p	hsa-miR-513b-3p	hsa-miR-4474-5p
chr7:80375243-80375409-	hsa-miR-3148	hsa-miR-545-5p	hsa-miR-875-3p	hsa-miR-6730-5p	hsa-miR-329-5p
chr6:160109182-160113738-	hsa-miR-1254	hsa-miR-5000-3p	hsa-miR-2467-3p	hsa-miR-3661	hsa-miR-3972
chr2:58390569-58393009-	hsa-miR-532-5p	hsa-miR-3688-3p	hsa-miR-6828-5p	hsa-miR-510-5p	hsa-miR-4520-5p
chr12:57689182-57704246-	hsa-miR-3189-3p	hsa-miR-4294	hsa-miR-4524a-5p	hsa-miR-4524b-5p	hsa-miR-221-5p
chr4:42024855-42041070+	hsa-miR-4742-3p	hsa-miR-630	hsa-miR-1185-1-3p	hsa-miR-1185-2-3p	hsa-miR-6884-3p
chr9:6464553-6465846+	hsa-miR-6852-3p	hsa-miR-337-3p	hsa-miR-3909	hsa-miR-5695	hsa-miR-6510-5p
chr18:18566911-18572898-	hsa-miR-6781-3p	hsa-miR-2682-3p	hsa-miR-4765	hsa-miR-5186	hsa-miR-1285-5p
chr18:74561482-74583781+	hsa-miR-5683	hsa-miR-4474-3p	hsa-miR-4746-3p	hsa-miR-4452	hsa-miR-514a-5p
chr1:93697983-93698150+	hsa-miR-6818-3p	hsa-miR-367-5p	hsa-miR-136-5p	hsa-miR-4679	hsa-miR-4635
chr5:137171717-137171977-	hsa-miR-4671-5p	hsa-miR-3936	hsa-miR-423-3p	hsa-miR-6782-5p	hsa-miR-608
chr3:138417749-138417937-	hsa-miR-449a	hsa-miR-449b-5p	hsa-miR-3615	hsa-miR-339-5p	hsa-miR-34c-5p
chr9:128112574-128118136+	hsa-miR-7107-3p	hsa-miR-6753-3p	hsa-miR-5196-5p	hsa-miR-939-3p	hsa-miR-3977
chr10:96818092-96827448-	hsa-miR-877-3p	hsa-miR-3158-3p	hsa-miR-629-3p	hsa-miR-6133	hsa-miR-21-3p
chr5:1611784-1612187-	hsa-miR-6828-3p	hsa-miR-1301-3p	hsa-miR-4526	hsa-miR-4660	hsa-miR-5047
chr13:21175844-21190018+	hsa-miR-544b	hsa-miR-6738-3p	hsa-miR-4427	hsa-miR-548p	hsa-miR-6747-3p
chr17:40379547-40384155-	hsa-miR-8056	hsa-miR-371b-3p	hsa-miR-4752	hsa-miR-545-5p	hsa-miR-665
chr4:3156020-3162119+	hsa-miR-202-3p	hsa-miR-3200-5p	hsa-miR-492	hsa-miR-5683	hsa-miR-544b
chr9:132569467-132571311+	hsa-miR-7151-5p	hsa-miR-1180-3p	hsa-miR-342-5p	hsa-miR-337-5p	hsa-miR-4707-3p
chr3:183454506-183472153+	hsa-miR-4498	hsa-miR-5001-5p	hsa-miR-1301-3p	hsa-miR-3652	hsa-miR-5047
chr1:104108057-104118162+	hsa-miR-6793-3p	hsa-miR-3180-5p	hsa-miR-6755-3p	hsa-miR-335-5p	hsa-miR-5187-5p
chr10:69748420-69773943-	hsa-miR-8079	hsa-miR-4700-5p	hsa-miR-8089	hsa-miR-671-3p	hsa-miR-424-5p
chr20:32996457-33001685+	hsa-miR-4743-3p	hsa-miR-1306-5p	hsa-miR-6733-3p	hsa-miR-5096	hsa-miR-6881-5p
chr2:232361806-232367915-	hsa-miR-3119	hsa-miR-4634	hsa-miR-3927-3p	hsa-miR-6803-3p	hsa-miR-483-3p
chr8:99718695-99740849-	hsa-miR-3074-3p	hsa-miR-6809-5p	hsa-miR-6747-5p	hsa-miR-6893-3p	hsa-miR-4666a-5p
chr1:212139772-212142049-	hsa-miR-3974	hsa-miR-3127-5p	hsa-miR-6815-3p	hsa-miR-3194-3p	hsa-miR-5702
chr5:43122141-43139411+	hsa-miR-3674	hsa-miR-3653-5p	hsa-miR-4778-3p	hsa-miR-15a-3p	hsa-miR-6728-3p
chr17:46929868-46933549+	hsa-miR-6873-3p	hsa-miR-4288	hsa-miR-4743-3p	hsa-miR-593-3p	hsa-miR-345-3p
chrY:14821321-14834120+	hsa-miR-6835-3p	hsa-miR-181a-3p	hsa-miR-193b-3p	hsa-miR-6854-5p	hsa-miR-1202
chr14:65332694-65339156-	hsa-miR-1226-5p	hsa-miR-1972	hsa-miR-5583-3p	hsa-miR-7848-3p	hsa-miR-4721
chr12:110345331-110346742+	hsa-miR-1281	hsa-miR-6812-3p	hsa-miR-4691-5p	hsa-miR-6791-3p	hsa-miR-1976
chr13:51738051-51738224+	hsa-miR-1976	hsa-miR-338-3p	hsa-miR-6768-3p	hsa-miR-6845-3p	hsa-miR-1282
chr15:99355282-99367471+	hsa-miR-1273a	hsa-miR-708-5p	hsa-miR-5684	hsa-miR-6795-5p	hsa-miR-4728-5p
chr3:182804481-182812393-	hsa-miR-149-3p	hsa-miR-6785-5p	hsa-miR-3692-5p	hsa-miR-6817-5p	hsa-miR-6883-5p
chr7:87514294-87517374+	hsa-miR-378c	hsa-miR-5187-5p	hsa-miR-378h	hsa-miR-378a-3p	hsa-miR-7852-3p
chr3:56703728-56707753-	hsa-miR-3607-3p	hsa-miR-4320	hsa-miR-1269b	hsa-miR-1269a	hsa-miR-6086
chr7:72669732-72673431-	hsa-miR-6833-5p	hsa-miR-659-3p	hsa-miR-4638-5p	hsa-miR-3190-3p	hsa-miR-7846-3p
chr1:21205816-21212864-	hsa-miR-4764-3p	hsa-miR-3977	hsa-miR-5001-3p	hsa-miR-597-3p	hsa-miR-6743-3p
chr10:128829914-128836080+	hsa-miR-181c-3p	hsa-miR-6875-3p	hsa-miR-6882-3p	hsa-miR-502-5p	hsa-miR-6814-5p
chr20:34312960-34326939-	hsa-miR-138-1-3p	hsa-miR-425-3p	hsa-miR-6841-3p	hsa-miR-5009-5p	hsa-miR-597-3p
chr3:185241859-185262593-	hsa-miR-5095	hsa-miR-4707-3p	hsa-miR-6747-3p	hsa-miR-7151-3p	hsa-miR-504-3p
chr7:63981442-63982878-	hsa-miR-3064-3p	hsa-miR-3925-3p	hsa-miR-135b-3p	hsa-miR-6873-3p	hsa-miR-23a-3p
chr1:91808987-91818856-	hsa-miR-338-3p	hsa-miR-515-5p	hsa-miR-218-5p	hsa-miR-412-5p	hsa-miR-424-5p
chr4:129913322-130003528-	hsa-miR-4727-5p	hsa-miR-6862-3p	hsa-miR-212-5p	hsa-miR-452-5p	hsa-miR-28-5p
chr14:50272739-50298079-	hsa-miR-6838-5p	hsa-miR-424-5p	hsa-miR-15b-5p	hsa-miR-4524a-5p	hsa-miR-107
chr15:56471468-56473752-	hsa-miR-25-3p	hsa-miR-4999-5p	hsa-miR-92a-3p	hsa-miR-6780a-5p	hsa-miR-4325
chr12:2364987-2365256-	hsa-miR-504-5p	hsa-miR-4725-5p	hsa-miR-4732-3p	hsa-miR-4661-3p	hsa-miR-513a-5p
chr19:54969493-54969700-	hsa-miR-6741-3p	hsa-miR-6771-5p	hsa-miR-4794	hsa-miR-212-5p	hsa-miR-3138
chr2:26486248-26492865+	hsa-miR-1287-3p	hsa-miR-504-3p	hsa-miR-4642	hsa-miR-6839-3p
chrM:4384-5482+	hsa-miR-6763-5p	hsa-miR-574-5p	hsa-miR-6848-5p	hsa-miR-6846-5p	hsa-miR-491-5p
chr7:139053873-139059217+	hsa-miR-4792	hsa-miR-7855-5p	hsa-miR-4763-3p	hsa-miR-3173-5p	hsa-miR-3136-5p
chr1:243471291-243507633+	hsa-miR-4448	hsa-miR-6738-3p	hsa-miR-5691	hsa-miR-6080	hsa-miR-5001-3p
chrM:13856-15518-	hsa-miR-1306-5p	hsa-miR-3679-3p	hsa-miR-566	hsa-miR-4640-3p	hsa-miR-7111-3p
chr2:33135829-33135991-	hsa-miR-519e-5p	hsa-miR-515-5p	hsa-miR-6759-5p	hsa-miR-3180-5p	hsa-miR-519d-5p
chr18:67420807-67421658+	hsa-miR-6873-3p	hsa-miR-4438	hsa-miR-4422	hsa-miR-4647	hsa-miR-3135b
chr6:57188999-57190843+	hsa-miR-22-5p	hsa-miR-4683	hsa-miR-3128	hsa-miR-362-5p	hsa-miR-3189-3p
chr2:233599127-233599948+	hsa-miR-6733-3p	hsa-miR-1273h-5p	hsa-miR-3611	hsa-miR-6878-5p	hsa-miR-6780a-5p
chr14:31392416-31398517-	hsa-miR-4656	hsa-miR-4707-3p	hsa-miR-3657	hsa-miR-4438	hsa-miR-5698
chr15:67893023-67956983+	hsa-miR-4659b-5p	hsa-miR-4659a-5p	hsa-miR-4720-5p	hsa-miR-1245b-5p	hsa-miR-151a-3p
chr1:155783425-155784240-	hsa-miR-6891-3p	hsa-miR-6072	hsa-miR-378f	hsa-miR-6736-3p	hsa-miR-378c
chr1:234534128-234536694-	hsa-miR-5094	hsa-miR-589-3p	hsa-miR-6503-5p	hsa-miR-4527	hsa-miR-4484
chr7:151174419-151188100-	hsa-miR-1289	hsa-miR-3915	hsa-miR-548az-5p	hsa-miR-3912-5p	hsa-miR-7159-3p
chr15:85213956-85231005-	hsa-miR-4662a-5p	hsa-miR-6873-3p	hsa-miR-2355-3p	hsa-miR-629-3p	hsa-miR-3156-3p
chr20:39726871-39729884+	hsa-miR-1248	hsa-miR-520a-5p	hsa-miR-5588-3p	hsa-miR-3180-5p	hsa-miR-1224-3p
chr19:19576149-19584927+	hsa-miR-1268b	hsa-miR-1268a	hsa-miR-1227-3p	hsa-miR-6769a-5p	hsa-miR-6769b-5p
chr11:28232609-28250478+	hsa-miR-499b-3p	hsa-miR-4772-5p	hsa-miR-499a-3p	hsa-miR-876-3p	hsa-miR-4657
chr11:82895721-82895950+	hsa-miR-138-5p	hsa-miR-8052	hsa-miR-23b-5p	hsa-miR-3936	hsa-miR-3199
chrX:67316712-67413794-	hsa-miR-6831-5p	hsa-miR-4782-3p	hsa-miR-361-5p	hsa-miR-6756-5p	hsa-miR-548an
chr17:34034926-34050833+	hsa-miR-373-3p	hsa-miR-302b-3p	hsa-miR-520c-3p	hsa-miR-520b	hsa-miR-302c-3p
chr8:52773405-52810765-	hsa-miR-2115-5p	hsa-miR-6887-3p	hsa-miR-328-5p	hsa-miR-3116	hsa-miR-7111-5p
chr12:94761570-94797038-	hsa-miR-3925-3p	hsa-miR-6876-3p	hsa-miR-516a-5p	hsa-miR-626	hsa-miR-6817-5p
chrX:48972080-48974164-	hsa-miR-370-3p	hsa-miR-3922-5p	hsa-miR-6893-3p	hsa-miR-637	hsa-miR-647
chr15:91524729-91524899-	hsa-miR-6818-3p	hsa-miR-515-5p	hsa-miR-519d-5p	hsa-miR-519e-5p	hsa-miR-6747-5p
chr2:20202224-20202398+	hsa-miR-3183	hsa-miR-7848-3p	hsa-miR-4723-3p	hsa-miR-6769b-3p	hsa-miR-7111-3p
chr19:47653459-47656297+	hsa-miR-542-3p	hsa-miR-758-3p	hsa-miR-6764-3p	hsa-miR-942-5p	hsa-miR-4482-5p
chr3:100013689-100015119+	hsa-miR-581	hsa-miR-4739	hsa-miR-619-3p	hsa-miR-4672	hsa-miR-4472
chr1:70790536-70801782-	hsa-miR-125a-5p	hsa-miR-6807-5p	hsa-miR-5096	hsa-miR-6084	hsa-miR-4319
chr1:167353094-167358998+	hsa-miR-3170	hsa-miR-6855-5p	hsa-let-7c-5p	hsa-miR-4458	hsa-let-7a-5p
chr5:132400672-132403249+	hsa-miR-3119	hsa-miR-6738-3p	hsa-miR-5001-3p	hsa-miR-1269a	hsa-miR-1269b
chr13:103468778-103474509+	hsa-miR-4784	hsa-miR-6868-3p	hsa-miR-4795-5p	hsa-miR-6802-5p	hsa-miR-497-3p
chr3:185879392-185906168-	hsa-miR-5581-5p	hsa-miR-6894-3p	hsa-miR-6747-3p	hsa-miR-4323	hsa-miR-1913
chr16:25139796-25151568+	hsa-miR-30c-1-3p	hsa-miR-30c-2-3p	hsa-miR-6872-3p	hsa-miR-6814-5p	hsa-miR-6788-5p
chr2:171862657-171867964-	hsa-miR-15b-5p	hsa-miR-4428	hsa-miR-4278	hsa-miR-581	hsa-miR-15a-5p
chr4:84337884-84353420-	hsa-miR-221-3p	hsa-miR-6831-5p	hsa-miR-511-5p	hsa-miR-3692-5p	hsa-miR-4793-3p
chr16:75425278-75448593-	hsa-miR-1268b	hsa-miR-1268a	hsa-miR-1202	hsa-miR-4707-3p	hsa-miR-4786-5p
chr7:65943996-65950140-	hsa-miR-320e	hsa-miR-3653-5p	hsa-miR-6874-3p	hsa-miR-1537-5p	hsa-miR-6882-3p
chr9:98766802-98766983+	hsa-miR-29b-1-5p	hsa-miR-3688-5p	hsa-miR-147a	hsa-miR-4778-3p	hsa-miR-6882-3p
chr3:52677264-52682458-	hsa-miR-6833-3p	hsa-miR-622	hsa-miR-362-5p	hsa-miR-7156-3p	hsa-miR-432-3p
chr16:71692136-71713438-	hsa-miR-4690-5p	hsa-miR-6501-5p	hsa-miR-122-5p	hsa-miR-6814-5p	hsa-miR-3657
chr16:47399699-47462809-	hsa-miR-1537-5p	hsa-miR-3660	hsa-miR-6776-3p	hsa-miR-4657	hsa-miR-4686
chr16:69317951-69318147+	hsa-miR-146b-3p	hsa-miR-7152-3p	hsa-miR-4728-5p	hsa-miR-874-3p	hsa-miR-3974
chr20:9353694-9360809+	hsa-miR-6853-3p	hsa-miR-4642	hsa-miR-539-3p	hsa-miR-3688-3p	hsa-miR-485-3p
chr17:65116521-65147340-	hsa-miR-761	hsa-miR-15a-3p	hsa-miR-214-3p	hsa-miR-3619-5p	hsa-miR-6762-3p
chr15:81271107-81274523-	hsa-miR-383-5p	hsa-miR-4797-3p	hsa-miR-598-3p	hsa-miR-6780a-3p	hsa-miR-4704-3p
chr16:11988811-11990642-	hsa-miR-877-3p	hsa-miR-149-5p	hsa-miR-6881-3p	hsa-miR-4746-3p	hsa-miR-6780a-3p
chr11:85979498-85988180+	hsa-miR-653-3p	hsa-miR-6504-5p	hsa-miR-202-5p	hsa-miR-3064-5p	hsa-miR-593-3p
chr5:68651476-68662422-	hsa-miR-7849-3p	hsa-miR-103b	hsa-miR-3664-5p	hsa-miR-6838-3p	hsa-miR-1910-5p
chr2:228356263-228359649+	hsa-miR-149-5p	hsa-miR-6818-5p	hsa-miR-378g	hsa-miR-6775-5p	hsa-miR-22-3p
chr8:6567002-6578424+	hsa-miR-8071	hsa-miR-5008-5p	hsa-miR-6802-5p	hsa-miR-889-5p	hsa-miR-6895-3p
chr13:46594584-46619651-	hsa-miR-3124-3p	hsa-miR-6780a-3p	hsa-miR-6883-3p	hsa-miR-4778-3p	hsa-miR-4446-5p
chr4:184614742-184622961+	hsa-miR-95-3p	hsa-miR-4642	hsa-miR-764	hsa-miR-132-3p	hsa-miR-193a-5p
chrM:8399-8609+	hsa-let-7i-5p	hsa-miR-4701-3p	hsa-miR-6127	hsa-miR-8072	hsa-miR-6129
chr4:2659530-2661781+	hsa-miR-3605-5p	hsa-miR-22-5p	hsa-miR-6852-5p	hsa-miR-4268	hsa-miR-6726-5p
chr2:159851414-159857701+	hsa-miR-3194-5p	hsa-miR-4667-3p	hsa-miR-3151-3p	hsa-miR-3175	hsa-miR-4725-5p
chr10:34834129-34875087-	hsa-miR-4324	hsa-miR-1273a	hsa-miR-4423-3p	hsa-miR-338-3p	hsa-miR-6889-5p
chr2:48869541-48898819+	hsa-miR-150-3p	hsa-miR-3692-5p	hsa-miR-591	hsa-miR-30d-3p	hsa-miR-30a-3p
chr3:182553823-182566345+	hsa-miR-1299	hsa-miR-4720-5p	hsa-miR-5004-5p	hsa-miR-4711-3p	hsa-miR-28-5p
chr4:37847254-37850272+	hsa-miR-6865-3p	hsa-miR-296-5p	hsa-miR-4632-5p	hsa-miR-1250-5p	hsa-miR-4778-3p
chr16:24942105-24946960-	hsa-miR-6785-5p	hsa-miR-3180-3p	hsa-miR-149-3p	hsa-miR-6883-5p	hsa-miR-3180
chr9:134888551-134889854-	hsa-miR-1273g-3p	hsa-miR-4632-5p	hsa-miR-5698	hsa-miR-6134	hsa-miR-1273e
chr15:77759437-77771663+	hsa-miR-6875-3p	hsa-miR-6881-3p	hsa-miR-6783-3p	hsa-miR-6744-3p	hsa-miR-6876-3p
chr10:75612012-75620647-	hsa-miR-588	hsa-miR-5088-3p	hsa-miR-3190-5p	hsa-miR-3197	hsa-miR-3974
chr10:79764228-79764394-	hsa-miR-874-5p	hsa-miR-296-5p	hsa-miR-6837-5p	hsa-miR-1233-3p	hsa-miR-3664-3p
chr12:121002875-121009094+	hsa-miR-1288-3p	hsa-miR-1250-5p	hsa-miR-711	hsa-miR-3614-3p	hsa-miR-4467
chr8:42259306-42260979+	hsa-miR-6838-5p	hsa-miR-6867-5p	hsa-miR-5586-5p	hsa-miR-6758-3p	hsa-miR-5004-3p
chr11:20419123-20424530+	hsa-miR-325	hsa-miR-3591-3p	hsa-miR-5196-3p	hsa-miR-6719-3p	hsa-miR-3160-3p
chr6:143222801-143248574-	hsa-miR-6749-3p	hsa-miR-4685-5p	hsa-miR-6837-5p	hsa-miR-1225-3p	hsa-miR-6865-5p
chr14:49765830-49765984-	hsa-miR-2110	hsa-miR-598-3p	hsa-miR-6796-3p	hsa-miR-545-5p	hsa-miR-2355-3p
chr7:6042084-6042267-	hsa-miR-6787-5p	hsa-miR-4278	hsa-miR-5706	hsa-miR-4787-5p	hsa-miR-6816-5p
chr4:39915231-39924368-	hsa-miR-3065-3p	hsa-miR-4317	hsa-miR-6884-3p	hsa-miR-4733-3p	hsa-miR-1289
chr12:1346087-1346245-	hsa-miR-6809-3p	hsa-miR-4753-3p	hsa-miR-6882-3p	hsa-miR-6732-3p	hsa-miR-6515-3p
chr6:147636651-147646220+	hsa-miR-873-3p	hsa-miR-6797-5p	hsa-miR-4656	hsa-miR-597-3p	hsa-miR-619-3p
chr10:94653106-94659401+	hsa-miR-4477b	hsa-miR-4502	hsa-miR-605-3p	hsa-miR-147a	hsa-miR-6876-5p
chr15:43294753-43317627-	hsa-miR-518a-5p	hsa-miR-527	hsa-miR-3714	hsa-miR-1306-5p	hsa-miR-4324
chr12:102301964-102313979+	hsa-miR-6768-3p	hsa-miR-143-3p	hsa-miR-4753-5p	hsa-miR-4770	hsa-miR-339-3p
chr13:20425495-20426330-	hsa-miR-3173-3p	hsa-miR-3925-3p	hsa-miR-6823-5p	hsa-miR-6501-5p	hsa-miR-4463
chr8:106427103-106431530+	hsa-miR-624-5p	hsa-miR-6769a-5p	hsa-miR-4436b-5p	hsa-miR-191-3p	hsa-miR-6072
chr12:112506684-112512568-	hsa-miR-376a-5p	hsa-miR-4650-5p	hsa-miR-614	hsa-miR-6744-3p	hsa-miR-6868-3p
chr12:30809618-30822216-	hsa-miR-6829-5p	hsa-miR-1295b-3p	hsa-miR-3620-5p	hsa-miR-95-3p	hsa-miR-6822-5p
chr10:32806873-32807433+	hsa-miR-3065-3p	hsa-miR-29a-3p	hsa-miR-29c-3p	hsa-miR-29b-3p
chr4:10728298-10728464-	hsa-miR-6887-3p	hsa-miR-4749-3p	hsa-miR-6733-5p	hsa-miR-497-3p	hsa-miR-4795-5p
chr9:17444195-17466889+	hsa-miR-192-5p	hsa-miR-215-5p	hsa-miR-4745-3p	hsa-miR-3664-5p	hsa-miR-6734-3p
chr14:92537279-92547405-	hsa-miR-4456	hsa-miR-4717-3p	hsa-miR-6810-3p	hsa-miR-3922-3p	hsa-miR-6801-3p
chr10:104569650-104569811+	hsa-miR-4417	hsa-miR-4470	hsa-miR-4660	hsa-miR-2861	hsa-miR-885-3p
chr2:29149571-29150391+	hsa-miR-5186	hsa-miR-146a-3p	hsa-miR-6769a-5p	hsa-miR-5088-5p	hsa-miR-4645-3p
chr8:17053013-17055160+	hsa-miR-29b-1-5p	hsa-miR-4715-5p	hsa-miR-6081	hsa-miR-6762-3p	hsa-miR-212-5p
chrM:14414-15491-	hsa-miR-566	hsa-miR-6771-3p	hsa-miR-1306-5p	hsa-miR-4640-3p	hsa-miR-424-5p
chr18:3821470-3821654-	hsa-miR-573	hsa-miR-597-5p	hsa-miR-3616-5p	hsa-miR-4440
chr9:130432177-130435540+	hsa-miR-3925-3p	hsa-miR-4649-3p	hsa-miR-3665	hsa-miR-4663	hsa-miR-363-5p
chr15:55640530-55640923-	hsa-miR-4758-5p	hsa-miR-3151-5p	hsa-miR-6817-5p	hsa-miR-6754-3p	hsa-miR-3614-3p
chr21:38792601-38853128+	hsa-miR-660-3p	hsa-miR-6756-5p	hsa-miR-3675-5p	hsa-miR-3121-5p	hsa-miR-1248
chr9:5859468-5867902-	hsa-miR-1202	hsa-miR-1227-5p	hsa-miR-624-5p	hsa-miR-6715b-5p	hsa-miR-4269
chr2:15629018-15651474-	hsa-miR-1266-3p	hsa-miR-598-5p	hsa-miR-4756-3p	hsa-miR-4673	hsa-miR-433-5p
chr19:34706029-34710782+	hsa-miR-3135b	hsa-miR-6859-3p	hsa-miR-3620-5p	hsa-miR-4700-3p	hsa-miR-6810-3p
chr9:17366615-17395067+	hsa-miR-3191-5p	hsa-miR-942-5p	hsa-miR-3120-5p	hsa-miR-3167	hsa-miR-4518
chr1:235954999-235956912-	hsa-miR-3605-3p	hsa-miR-7108-5p	hsa-miR-20b-3p	hsa-miR-452-5p	hsa-miR-4489
chr3:28293203-28336020+	hsa-miR-4326	hsa-miR-4766-3p	hsa-miR-7109-3p	hsa-miR-7109-5p	hsa-miR-4755-3p
chr4:54248445-54266006+	hsa-miR-4718	hsa-miR-764	hsa-miR-1236-3p	hsa-miR-765	hsa-miR-4434
chr7:11080299-11101712+	hsa-miR-6791-3p	hsa-miR-218-1-3p	hsa-miR-3189-3p	hsa-miR-6829-3p	hsa-miR-6836-3p
chr1:22030755-22048257-	hsa-miR-6753-3p	hsa-miR-30c-1-3p	hsa-miR-5008-5p	hsa-miR-6810-5p	hsa-miR-22-5p
chr10:53445439-53448382+	hsa-miR-92a-2-5p	hsa-miR-7110-5p	hsa-miR-6752-5p	hsa-miR-3916	hsa-miR-4723-5p
chr6:6251101-6266917-	hsa-miR-4711-5p	hsa-miR-34a-3p	hsa-miR-6878-3p	hsa-miR-130b-5p	hsa-miR-6778-3p
chr17:73238417-73239651-	hsa-miR-6836-5p	hsa-miR-5587-5p	hsa-miR-4763-3p	hsa-miR-6880-5p	hsa-miR-3064-5p
chr5:171341347-171424055-	hsa-miR-449b-3p	hsa-miR-450a-2-3p	hsa-miR-5586-5p	hsa-miR-141-5p	hsa-miR-96-5p
chr6:110959852-110985714-	hsa-miR-8065	hsa-miR-939-3p	hsa-miR-92a-2-5p	hsa-miR-1268b	hsa-miR-1268a
chr11:108057209-108062917-	hsa-miR-450a-2-3p	hsa-miR-6895-5p	hsa-miR-380-5p	hsa-miR-6772-3p	hsa-miR-4708-5p
chr10:11207449-11259470+	hsa-miR-4765	hsa-miR-345-5p	hsa-miR-4746-5p	hsa-miR-658	hsa-miR-568
chr12:72051306-72054207-	hsa-miR-6868-3p	hsa-miR-1273g-3p	hsa-miR-1273e	hsa-miR-4459	hsa-miR-875-5p
chrY:14832522-14851563+	hsa-miR-4657	hsa-miR-3606-5p	hsa-miR-181a-3p	hsa-miR-6854-5p	hsa-miR-1202
chr1:155644476-155644887-	hsa-miR-6865-5p	hsa-miR-6722-3p	hsa-miR-5572	hsa-miR-1273h-5p	hsa-miR-6855-5p
chr16:11217599-11220003+	hsa-miR-5001-5p	hsa-miR-4498	hsa-miR-4492	hsa-miR-762	hsa-miR-6893-5p
chr3:15071782-15076316+	hsa-miR-4538	hsa-miR-138-5p	hsa-miR-3187-5p	hsa-miR-3661	hsa-miR-1269a
chr3:50137415-50140599+	hsa-miR-33a-5p	hsa-miR-33b-5p	hsa-miR-6881-3p	hsa-miR-106a-3p	hsa-miR-877-3p
chr2:136360070-136362586+	hsa-miR-7150	hsa-miR-6073	hsa-miR-6726-5p	hsa-miR-7843-3p	hsa-miR-6738-3p
chrX:122735043-122745367-	hsa-miR-4510	hsa-miR-6760-5p	hsa-miR-6797-5p	hsa-miR-4779	hsa-miR-3156-3p
chr15:73854237-73866136-	hsa-miR-6878-3p	hsa-miR-1227-5p	hsa-miR-6835-5p	hsa-miR-18a-3p	hsa-miR-4642
chr3:169700495-169706147+	hsa-miR-3692-5p	hsa-miR-6794-5p	hsa-miR-4778-3p	hsa-miR-187-5p	hsa-miR-5096
chr11:93435626-93440063+	hsa-miR-4461	hsa-miR-96-5p	hsa-miR-3189-5p	hsa-miR-4417	hsa-miR-186-3p
chr16:89291127-89292039-	hsa-miR-6779-5p	hsa-miR-6778-5p	hsa-miR-1233-5p	hsa-miR-7106-5p	hsa-miR-4659a-5p
chr2:145075046-145077435-	hsa-miR-1289	hsa-miR-21-3p	hsa-miR-4309	hsa-miR-370-3p	hsa-miR-3198
chr12:5915218-5941769-	hsa-miR-6727-5p	hsa-miR-1299	hsa-miR-8060	hsa-miR-3665	hsa-miR-4734
chr1:93676359-93683426+	hsa-miR-6874-3p	hsa-miR-3152-5p	hsa-miR-148b-5p	hsa-miR-127-5p	hsa-miR-544a
chr3:119188667-119211596+	hsa-miR-5095	hsa-miR-642b-3p	hsa-miR-6069	hsa-miR-504-5p	hsa-miR-4256
chr2:105912813-105915042-	hsa-miR-4667-3p	hsa-miR-6503-5p	hsa-miR-4290	hsa-miR-4527	hsa-miR-8066
chr6:30457594-30457749+	hsa-miR-4714-5p	hsa-miR-6846-3p	hsa-miR-6789-3p	hsa-miR-3605-3p	hsa-miR-6887-3p
chr14:65259508-65259677-	hsa-miR-6764-5p	hsa-miR-769-5p	hsa-miR-3918	hsa-miR-4717-5p	hsa-miR-520a-5p
chr7:151178635-151188100-	hsa-miR-6837-5p	hsa-miR-4685-5p	hsa-miR-4446-3p	hsa-miR-6795-5p	hsa-miR-7110-5p
chr3:170841385-170858298-	hsa-miR-4700-5p	hsa-miR-8089	hsa-miR-6815-3p	hsa-miR-4268	hsa-miR-4667-5p
chr8:28821328-28837673+	hsa-miR-1302	hsa-miR-509-3p	hsa-miR-3911	hsa-miR-659-5p	hsa-miR-6792-3p
chr8:48812933-48815355-	hsa-miR-6819-5p	hsa-miR-3938	hsa-miR-4477b	hsa-miR-370-3p	hsa-miR-6812-5p
chr8:125575023-125580777-	hsa-miR-4665-5p	hsa-miR-4731-5p	hsa-miR-637	hsa-miR-625-5p	hsa-miR-4640-5p
chr18:3187478-3193956-	hsa-miR-1288-3p	hsa-miR-1254	hsa-miR-3116	hsa-miR-6506-3p	hsa-miR-510-5p
chr1:159889561-159890283-	hsa-miR-7848-3p	hsa-miR-199b-5p	hsa-miR-6510-5p	hsa-miR-2355-5p	hsa-miR-3972
chr6:136681835-136682317-	hsa-miR-596	hsa-miR-6849-3p	hsa-miR-103a-2-5p	hsa-miR-6873-3p	hsa-miR-4268
chr6:80383331-80383516+	hsa-miR-4763-3p	hsa-miR-3152-5p	hsa-miR-3689f	hsa-miR-6865-5p	hsa-miR-6134
chr22:26081137-26091181-	hsa-miR-6778-3p	hsa-miR-1910-3p	hsa-miR-6511a-5p	hsa-miR-6867-3p	hsa-miR-566
chr16:50249986-50251574+	hsa-miR-122-3p	hsa-miR-144-5p	hsa-miR-545-5p	hsa-miR-9-3p	hsa-miR-6891-3p
chr12:53925528-53928443-	hsa-miR-6883-5p	hsa-miR-6827-5p	hsa-miR-149-3p	hsa-miR-6785-5p	hsa-miR-4689
chr15:59179174-59179739-	hsa-miR-214-5p	hsa-miR-7976	hsa-miR-6769a-5p	hsa-miR-6889-3p	hsa-miR-6795-3p
chr17:35985941-35988716-	hsa-miR-934	hsa-miR-4654	hsa-miR-146a-3p	hsa-miR-6511b-5p	hsa-miR-513b-5p
chr22:38891801-38897285-	hsa-miR-6511b-5p	hsa-miR-371a-5p	hsa-miR-5089-3p	hsa-miR-6860	hsa-miR-612
chr10:1118056-1126416+	hsa-miR-138-5p	hsa-miR-6731-5p	hsa-miR-3194-3p	hsa-miR-328-3p	hsa-miR-892b
chr12:77191214-77203637+	hsa-miR-5682	hsa-miR-1537-5p	hsa-miR-6887-3p	hsa-miR-5690	hsa-miR-4690-3p
chr5:72012533-72012699+	hsa-miR-6833-3p	hsa-miR-708-5p	hsa-miR-28-5p	hsa-miR-5706	hsa-miR-181a-2-3p
chr7:105738136-105739728-	hsa-miR-562	hsa-miR-6735-5p	hsa-miR-298	hsa-miR-4436b-3p	hsa-miR-4632-5p
chr12:65720606-65785034+	hsa-miR-1273a	hsa-miR-3132	hsa-miR-197-5p	hsa-miR-6803-5p	hsa-miR-6835-5p
chr17:42501717-42513913-	hsa-miR-4641	hsa-miR-487b-5p	hsa-miR-500a-5p	hsa-miR-760	hsa-miR-551b-3p
chr15:78782764-78783103+	hsa-miR-374c-3p	hsa-miR-8057	hsa-miR-6864-5p	hsa-miR-3116	hsa-miR-6820-5p
chr17:30689933-30695033+	hsa-miR-8089	hsa-miR-6811-3p	hsa-miR-6721-5p	hsa-miR-4496	hsa-miR-4443
chr7:74491493-74496544+	hsa-miR-1273h-5p	hsa-miR-30b-3p	hsa-miR-3689b-3p	hsa-miR-3689c	hsa-miR-6779-5p
chr15:43762056-43762264-	hsa-miR-3188	hsa-miR-1248	hsa-miR-4514	hsa-miR-6808-5p	hsa-miR-4505
chr1:224592132-224601037-	hsa-miR-374b-3p	hsa-miR-378h	hsa-miR-6501-3p	hsa-miR-6755-3p	hsa-miR-378c
chr21:44514581-44515853-	hsa-miR-1307-3p	hsa-miR-4660	hsa-miR-3607-3p	hsa-miR-4726-3p	hsa-miR-6746-3p
chr12:77235805-77243250+	hsa-miR-3663-3p	hsa-miR-3164	hsa-miR-4437	hsa-miR-6820-3p	hsa-miR-545-3p
chr4:174145265-174151184+	hsa-miR-6780b-5p	hsa-miR-4725-3p	hsa-miR-6738-3p	hsa-miR-16-5p	hsa-miR-620
chr6:131921178-131927764-	hsa-miR-762	hsa-miR-485-5p	hsa-miR-3974	hsa-miR-432-5p	hsa-miR-4522
chr10:24955914-25003307-	hsa-miR-1268b	hsa-miR-1268a	hsa-miR-6887-5p	hsa-miR-3686	hsa-miR-3606-5p
chr9:17309056-17342442+	hsa-miR-450a-2-3p	hsa-miR-3137	hsa-miR-6810-5p	hsa-miR-515-3p	hsa-miR-6890-3p
chr18:51690893-51731527-	hsa-miR-6739-3p	hsa-miR-503-5p	hsa-miR-182-5p	hsa-miR-3200-3p	hsa-miR-922
chr11:82976907-82991303-	hsa-miR-6728-3p	hsa-miR-6828-3p	hsa-miR-3613-5p	hsa-miR-7849-3p	hsa-miR-6758-3p
chr17:27778473-27822745+	hsa-miR-516b-5p	hsa-miR-29c-3p	hsa-miR-29a-3p	hsa-miR-29b-3p	hsa-miR-630
chr3:37190385-37196215-	hsa-miR-670-3p	hsa-miR-1273g-3p	hsa-miR-4677-5p	hsa-miR-433-5p	hsa-miR-6726-5p
chr5:149781498-149781687-	hsa-miR-485-5p	hsa-miR-6783-3p	hsa-miR-1343-3p	hsa-miR-4512	hsa-miR-6836-5p
chr14:35062251-35078948-	hsa-miR-519d-5p	hsa-miR-4762-5p	hsa-miR-497-5p	hsa-miR-374b-3p	hsa-miR-3653-5p
chr4:48158697-48178203-	hsa-miR-6837-3p	hsa-miR-6739-3p	hsa-miR-3152-3p	hsa-miR-6503-3p	hsa-miR-3618
chr11:95401661-95401823+	hsa-miR-3136-5p	hsa-miR-4439	hsa-miR-4529-3p	hsa-miR-4715-3p	hsa-miR-4639-3p
chr16:88694030-88695262+	hsa-miR-4731-5p	hsa-miR-762	hsa-miR-4709-5p	hsa-miR-7162-5p	hsa-miR-6832-3p
chr12:70149164-70150443+	hsa-miR-6828-3p	hsa-miR-5586-5p	hsa-miR-5682	hsa-miR-4525	hsa-miR-6847-5p
chr7:64852815-64853814+	hsa-miR-502-5p	hsa-miR-499a-3p	hsa-miR-4772-5p	hsa-miR-6720-5p	hsa-miR-4685-5p
chr1:146737591-146740537+	hsa-miR-325	hsa-miR-761	hsa-miR-4301	hsa-miR-340-3p	hsa-miR-6787-3p
chr7:37052904-37073017-	hsa-miR-3139	hsa-miR-6736-5p	hsa-miR-5683	hsa-miR-363-5p	hsa-miR-6748-5p
chr9:20819795-20823114+	hsa-miR-10b-5p	hsa-miR-4703-3p	hsa-miR-329-3p	hsa-miR-4666a-3p	hsa-miR-10a-5p
chr8:25220563-25222220+	hsa-miR-545-3p	hsa-miR-7153-5p	hsa-miR-8081	hsa-miR-10b-5p	hsa-miR-10a-5p
chr7:36989771-36990174-	hsa-miR-6876-3p	hsa-miR-4799-3p	hsa-miR-939-3p	hsa-miR-411-3p	hsa-miR-331-3p
chr17:62248460-62265775-	hsa-miR-637	hsa-miR-4641	hsa-miR-6848-5p	hsa-miR-6846-5p	hsa-miR-7974
chr5:10415600-10417516+	hsa-miR-6827-5p	hsa-miR-4715-3p	hsa-miR-766-3p	hsa-miR-640	hsa-miR-3126-5p
chr3:142455221-142467302+	hsa-miR-3675-5p	hsa-miR-4793-5p	hsa-miR-150-5p	hsa-miR-629-3p	hsa-miR-3132
chr9:79115832-79131692+	hsa-miR-323b-5p	hsa-miR-410-5p	hsa-miR-8064	hsa-miR-4769-5p	hsa-miR-876-5p
chr7:90546916-90585132+	hsa-miR-383-5p	hsa-miR-3165	hsa-miR-4696	hsa-miR-138-5p	hsa-miR-4457
chr5:112321532-112339774+	hsa-miR-3692-3p	hsa-miR-15b-5p	hsa-miR-6811-3p	hsa-miR-4524b-5p	hsa-miR-6737-3p
chr12:66597494-66611015+	hsa-miR-3651	hsa-miR-6846-5p	hsa-miR-1-5p	hsa-miR-4330	hsa-miR-181b-3p
chr20:2967411-2988066+	hsa-miR-31-5p	hsa-miR-6857-5p	hsa-miR-8071	hsa-miR-6718-5p	hsa-miR-4435
chr10:75214170-75239275-	hsa-miR-589-3p	hsa-miR-3665	hsa-miR-203a-5p	hsa-miR-4764-5p	hsa-miR-3674
chr12:30816423-30843511-	hsa-miR-5196-3p	hsa-miR-6072	hsa-miR-6891-3p	hsa-miR-7161-5p	hsa-miR-6873-3p
chr15:72180345-72186119-	hsa-miR-7843-3p	hsa-miR-3614-3p	hsa-miR-6514-5p	hsa-miR-6895-3p	hsa-miR-6888-3p
chr19:17294638-17302028+	hsa-miR-6774-5p	hsa-miR-6132	hsa-miR-4459	hsa-miR-3665	hsa-miR-8075
chr19:16503115-16504812-	hsa-miR-3185	hsa-miR-632	hsa-miR-1267	hsa-miR-6071	hsa-miR-4288
chr18:59768308-59770135-	hsa-miR-502-5p	hsa-miR-3921	hsa-miR-5003-5p	hsa-miR-6768-5p	hsa-miR-1200
chr1:159846346-159847252-	hsa-miR-6783-3p	hsa-miR-4469	hsa-miR-939-3p	hsa-miR-3120-5p	hsa-miR-4746-5p
chr4:106127405-106129857+	hsa-miR-7973	hsa-miR-2114-5p	hsa-miR-7153-3p	hsa-miR-548v	hsa-miR-4687-5p
chr11:85692172-85693031-	hsa-miR-656-5p	hsa-miR-5096	hsa-miR-6778-5p	hsa-miR-6765-3p	hsa-miR-196a-3p
chr6:158850768-158852695+	hsa-miR-4667-5p	hsa-miR-4700-5p	hsa-miR-6791-5p	hsa-miR-1273d	hsa-miR-3149
chr21:38792601-38794168-	hsa-miR-6783-5p	hsa-miR-3149	hsa-miR-2052	hsa-miR-4472	hsa-miR-664a-5p
chrY:2276786-2293345-	hsa-miR-4662a-5p	hsa-miR-215-3p	hsa-miR-1251-3p	hsa-miR-4659a-3p	hsa-miR-4659b-3p
chr18:20548769-20564953+	hsa-miR-6071	hsa-miR-3691-5p	hsa-miR-759	hsa-miR-22-5p	hsa-miR-148b-5p
chr4:119059209-119064839+	hsa-miR-376b-5p	hsa-miR-376c-5p	hsa-miR-6762-5p	hsa-miR-3184-5p	hsa-miR-6788-5p
chr12:53421566-53421972+	hsa-miR-6890-3p	hsa-miR-4740-3p	hsa-miR-5193	hsa-miR-6853-5p	hsa-miR-29c-5p
chr10:126628943-126631876+	hsa-miR-6747-3p	hsa-miR-5095	hsa-miR-548bb-3p	hsa-miR-548z	hsa-miR-548h-3p
chr15:50935537-50941082-	hsa-miR-496	hsa-miR-6516-5p	hsa-miR-3928-5p	hsa-miR-6502-3p	hsa-miR-4503
chr8:124035953-124042956-	hsa-miR-3690	hsa-miR-584-3p	hsa-miR-711	hsa-miR-4676-5p	hsa-miR-5195-3p
chr12:53848534-53858815+	hsa-miR-5698	hsa-miR-7109-5p	hsa-miR-1226-3p	hsa-miR-608	hsa-miR-566
chr12:89853415-89885892-	hsa-miR-425-5p	hsa-miR-6841-5p	hsa-miR-191-5p	hsa-miR-6794-5p	hsa-miR-1229-5p
chr6:76344423-76380436+	hsa-miR-503-3p	hsa-miR-3182	hsa-miR-3613-5p	hsa-miR-526b-5p	hsa-miR-6165
chr3:170855980-170858298-	hsa-miR-6815-3p	hsa-miR-4268	hsa-miR-593-3p	hsa-miR-6882-3p	hsa-miR-1281
chr1:193119434-193121574+	hsa-miR-7843-3p	hsa-miR-7153-3p	hsa-miR-3614-3p	hsa-miR-1468-5p	hsa-miR-4297
chr18:55912659-55919286+	hsa-miR-629-5p	hsa-miR-6839-3p	hsa-miR-26a-1-3p	hsa-miR-1231	hsa-miR-345-3p
chr13:95686859-95727805-	hsa-miR-1226-5p	hsa-miR-3616-3p	hsa-miR-1200	hsa-miR-183-5p	hsa-miR-4724-3p
chr7:90708747-90747523+	hsa-miR-4298	hsa-miR-4636	hsa-miR-4747-3p	hsa-miR-186-3p	hsa-miR-708-5p
chr3:184675162-184689540+	hsa-miR-4507	hsa-miR-605-3p	hsa-miR-767-5p	hsa-miR-3940-5p	hsa-miR-5691
chr16:81385188-81411307+	hsa-miR-4706	hsa-miR-6728-3p	hsa-miR-4749-5p	hsa-miR-892b	hsa-miR-7157-3p
chr5:39153550-39160022-	hsa-miR-6747-3p	hsa-miR-939-3p	hsa-miR-876-3p	hsa-miR-4715-5p	hsa-let-7g-3p
chr1:44666214-44667115-	hsa-miR-1226-3p	hsa-miR-6829-3p	hsa-miR-6791-3p	hsa-miR-6836-3p	hsa-miR-3934-5p
chr3:9484992-9487424+	hsa-miR-935	hsa-miR-1299	hsa-miR-6134	hsa-miR-6769a-5p	hsa-miR-6769b-5p
chr5:118576114-118580271+	hsa-miR-4736	hsa-miR-7150	hsa-miR-337-5p	hsa-miR-8057	hsa-miR-6882-3p
chr20:34446224-34459751+	hsa-miR-6868-3p	hsa-miR-6844	hsa-miR-6830-3p	hsa-miR-4768-3p	hsa-miR-4743-3p
chr4:108603171-108608333-	hsa-miR-499a-3p	hsa-miR-2276-5p	hsa-miR-892c-5p	hsa-miR-6744-3p	hsa-miR-553
chr20:10536879-10541468-	hsa-miR-222-5p	hsa-miR-6511a-3p	hsa-miR-362-5p	hsa-miR-625-5p	hsa-miR-3529-3p
chr17:40497577-40500538-	hsa-miR-136-5p	hsa-miR-6762-5p	hsa-miR-4726-5p	hsa-miR-4640-5p	hsa-miR-4732-5p
chr1:51926763-51929470-	hsa-miR-1324	hsa-miR-378g	hsa-miR-6757-3p	hsa-miR-653-3p	hsa-miR-150-5p
chr17:27837882-27861318+	hsa-miR-1237-3p	hsa-miR-155-5p	hsa-miR-4730	hsa-miR-4732-3p	hsa-miR-1537-5p
chr17:12011107-12016677+	hsa-miR-27b-3p	hsa-miR-27a-3p	hsa-miR-4436b-5p	hsa-let-7d-5p	hsa-let-7g-5p
chr11:13435077-13443385-	hsa-miR-2276-5p	hsa-miR-4539	hsa-miR-29b-3p	hsa-miR-3160-3p	hsa-miR-29c-3p
chr9:36369716-36376124-	hsa-miR-363-5p	hsa-miR-6812-5p	hsa-miR-6760-5p	hsa-miR-4723-3p	hsa-miR-1255a
chr11:128993341-128997200-	hsa-miR-4643	hsa-miR-496	hsa-miR-3529-5p	hsa-miR-4668-5p	hsa-miR-4445-3p
chr2:153535866-153537850-	hsa-miR-3529-5p	hsa-miR-29b-1-5p	hsa-miR-580-3p	hsa-miR-629-3p	hsa-miR-29b-2-5p
chr12:5860002-5941769-	hsa-miR-5187-5p	hsa-miR-6727-5p	hsa-miR-1299	hsa-miR-8060	hsa-miR-4645-5p
chr5:66055537-66084622+	hsa-miR-6876-3p	hsa-miR-6837-5p	hsa-miR-4258	hsa-miR-181d-3p	hsa-miR-4685-5p
chr2:32818982-32828150+	hsa-miR-6072	hsa-miR-432-5p	hsa-miR-888-3p	hsa-miR-1827	hsa-miR-605-5p
chr4:151356741-151408986-	hsa-miR-1255b-2-3p	hsa-miR-6082	hsa-miR-3927-3p	hsa-miR-26a-1-3p	hsa-miR-182-3p
chr11:73829273-73829427-	hsa-miR-6893-3p	hsa-miR-4475	hsa-miR-6837-3p	hsa-miR-7515	hsa-miR-31-5p
chr16:11980328-11981607-	hsa-miR-6513-5p	hsa-miR-6780b-3p	hsa-miR-4676-3p	hsa-miR-6510-5p	hsa-miR-551a
chr8:17141982-17143936+	hsa-miR-2117	hsa-miR-544a	hsa-miR-1236-3p	hsa-miR-3688-5p	hsa-miR-5695
chr7:102039995-102047945+	hsa-miR-1184	hsa-miR-3157-5p	hsa-miR-6838-3p	hsa-miR-942-5p	hsa-miR-4753-3p
chr15:41365626-41366763-	hsa-miR-6861-5p	hsa-miR-145-5p	hsa-miR-660-3p	hsa-miR-5195-3p	hsa-miR-7157-5p
chr2:136389288-136403097+	hsa-miR-3692-5p	hsa-miR-4763-5p	hsa-miR-4762-3p	hsa-miR-5589-5p	hsa-miR-6865-5p
chr1:220178590-220180680-	hsa-miR-377-5p	hsa-miR-6507-3p	hsa-miR-578	hsa-miR-140-5p	hsa-miR-940
chr7:111012505-111012669+	hsa-miR-6736-3p	hsa-miR-4504	hsa-miR-4686	hsa-miR-516b-3p	hsa-miR-516a-3p
chr3:5213835-5214425+	hsa-miR-1184	hsa-miR-30e-5p	hsa-miR-96-3p	hsa-miR-425-3p	hsa-miR-30a-5p
chr10:49609655-49618211+	hsa-miR-6755-3p	hsa-miR-30c-5p	hsa-miR-30e-5p	hsa-miR-876-5p	hsa-miR-433-3p
chr1:150413399-150416853+	hsa-miR-6737-3p	hsa-miR-4682	hsa-miR-5008-3p	hsa-miR-2909	hsa-miR-1296-5p
chr10:32912647-32914072+	hsa-miR-196a-3p	hsa-miR-1256	hsa-miR-3909	hsa-miR-4660	hsa-miR-7106-3p
chr6:105192035-105198347-	hsa-miR-942-5p	hsa-miR-4753-3p	hsa-miR-6745	hsa-miR-4705	hsa-miR-6883-5p
chr12:42604157-42606286-	hsa-miR-5586-5p	hsa-miR-193a-5p	hsa-miR-6845-3p	hsa-miR-942-5p	hsa-miR-4446-5p
chr9:36352739-36353328+	hsa-miR-7848-3p	hsa-miR-891b	hsa-miR-6790-5p	hsa-miR-1264	hsa-miR-4797-5p
chr17:35931890-35945538+	hsa-miR-1273h-5p	hsa-miR-6780a-5p	hsa-miR-3689a-3p	hsa-miR-3689c	hsa-miR-3689b-3p
chr17:18692666-18707579+	hsa-miR-5189-3p	hsa-miR-29a-5p	hsa-miR-4429	hsa-miR-5682	hsa-miR-4663
chr2:61343114-61345251-	hsa-miR-3136-5p	hsa-miR-3202	hsa-miR-4439	hsa-miR-3908	hsa-miR-4665-5p
chr10:89301490-89301660+	hsa-miR-4298	hsa-miR-642a-5p	hsa-miR-661	hsa-miR-6861-3p	hsa-miR-4277
chr7:129539254-129539548-	hsa-miR-3152-5p	hsa-miR-6781-3p	hsa-miR-3664-3p	hsa-miR-3934-3p	hsa-miR-1248
chr17:34910661-34923615+	hsa-miR-4298	hsa-miR-7703	hsa-miR-4720-3p	hsa-miR-888-3p	hsa-miR-219b-5p
chr19:46334642-46334846-	hsa-miR-197-3p	hsa-miR-6829-3p	hsa-miR-6887-5p	hsa-miR-4523	hsa-miR-6795-5p
chr17:5298211-5302970-	hsa-miR-1265	hsa-miR-452-3p	hsa-miR-640	hsa-miR-4778-3p	hsa-miR-1226-3p
chr4:37841470-37841881+	hsa-miR-4689	hsa-miR-6866-3p	hsa-miR-188-5p	hsa-miR-4733-5p	hsa-miR-3684
chr20:25394426-25397838+	hsa-miR-485-3p	hsa-miR-6733-3p	hsa-miR-539-3p	hsa-miR-3977	hsa-miR-4494
chr1:21151593-21167521-	hsa-miR-4727-5p	hsa-miR-8077	hsa-miR-4448	hsa-miR-6507-3p	hsa-miR-939-3p
chr1:193104521-193107303+	hsa-miR-5088-3p	hsa-miR-1184	hsa-miR-758-3p	hsa-miR-5047	hsa-miR-452-3p
chr7:80302086-80303463+	hsa-miR-7156-3p	hsa-miR-5582-5p	hsa-miR-4423-3p	hsa-miR-6881-3p	hsa-miR-5195-3p
chr7:74616841-74618329-	hsa-miR-1236-3p	hsa-miR-4436b-5p	hsa-miR-4440	hsa-miR-5581-5p	hsa-miR-6768-5p
chr20:9211417-9281320+	hsa-miR-330-5p	hsa-miR-1227-3p	hsa-miR-6886-5p	hsa-miR-6887-5p	hsa-miR-6795-5p
chr4:170076631-170077830-	hsa-miR-632	hsa-miR-4288	hsa-miR-3121-5p	hsa-miR-346	hsa-miR-106a-5p
chr7:90585012-90613556+	hsa-miR-7159-5p	hsa-miR-4457	hsa-miR-15b-5p	hsa-miR-424-5p	hsa-miR-6893-5p
chr1:115147543-115153738-	hsa-miR-4529-3p	hsa-miR-8074	hsa-miR-6895-3p	hsa-miR-590-5p	hsa-miR-7-5p
chr11:72560800-72579071-	hsa-miR-4722-5p	hsa-miR-145-5p	hsa-miR-130b-5p	hsa-miR-4716-5p	hsa-miR-5001-5p
chr7:148863250-148864022+	hsa-miR-6780a-3p	hsa-miR-3173-5p	hsa-miR-514a-5p	hsa-miR-6799-3p	hsa-miR-3200-5p
chr1:78411191-78422385-	hsa-miR-6515-5p	hsa-miR-450a-2-3p	hsa-miR-566	hsa-miR-4649-5p	hsa-miR-488-3p
chr16:15758593-15761296+	hsa-miR-5047	hsa-miR-6785-3p	hsa-miR-6881-3p	hsa-miR-593-3p	hsa-miR-1301-3p
chr7:77265099-77266365+	hsa-miR-3614-3p	hsa-miR-655-5p	hsa-miR-378a-5p	hsa-miR-499b-5p	hsa-miR-4257
chr15:66828271-66839043+	hsa-miR-1206	hsa-miR-502-3p	hsa-miR-6501-5p	hsa-miR-500a-3p	hsa-miR-6773-3p
chr6:18255962-18258636-	hsa-miR-548b-3p	hsa-miR-4263	hsa-miR-3622a-3p	hsa-miR-4659a-3p	hsa-miR-8057
chr2:113405230-113410375+	hsa-miR-3605-5p	hsa-miR-6894-5p	hsa-miR-6511b-5p	hsa-miR-5001-3p	hsa-miR-99a-3p
chr4:174305802-174325101+	hsa-miR-4707-3p	hsa-miR-6878-3p	hsa-miR-7705	hsa-miR-3194-5p	hsa-miR-1273a
chr8:125530983-125534441-	hsa-miR-1185-5p	hsa-miR-3591-3p	hsa-miR-376a-2-5p	hsa-miR-548u	hsa-miR-21-3p
chr8:87162207-87162373+	hsa-miR-519b-3p	hsa-miR-519a-3p	hsa-miR-4696	hsa-miR-4790-5p	hsa-miR-4315
chr10:46233431-46240330+	hsa-miR-659-3p	hsa-miR-378i	hsa-miR-378d	hsa-miR-378c	hsa-miR-378a-3p
chr2:171862657-171871458-	hsa-miR-15b-5p	hsa-miR-4428	hsa-miR-4278	hsa-miR-581	hsa-miR-15a-5p
chr15:72810408-72864506+	hsa-miR-4795-5p	hsa-miR-3121-5p	hsa-miR-6872-3p	hsa-miR-5009-5p	hsa-miR-3973
chr1:16621278-16643066-	hsa-miR-4649-3p	hsa-miR-6849-3p	hsa-miR-330-5p	hsa-miR-1273g-3p	hsa-miR-4735-3p
chr18:59739906-59770135-	hsa-miR-502-5p	hsa-miR-3921	hsa-miR-6768-5p	hsa-miR-500a-5p	hsa-miR-145-5p
chr20:33000321-33012331+	hsa-miR-1306-5p	hsa-miR-6733-3p	hsa-miR-5096	hsa-miR-593-3p	hsa-miR-1279
chr14:55071090-55169298+	hsa-miR-6878-3p	hsa-miR-5699-5p	hsa-miR-4640-3p	hsa-miR-4707-3p	hsa-miR-4746-5p
chr5:61648415-61651081+	hsa-miR-620	hsa-miR-1270	hsa-miR-6783-3p	hsa-miR-4796-5p	hsa-miR-539-3p
chr1:217242960-217243131-	hsa-miR-4797-5p	hsa-miR-1909-5p	hsa-miR-6165	hsa-miR-4690-5p	hsa-miR-7515
chr5:55251853-55253119-	hsa-miR-3137	hsa-miR-6808-5p	hsa-let-7a-2-3p	hsa-miR-4695-5p	hsa-let-7g-3p
chr12:4626227-4628046-	hsa-miR-3688-5p	hsa-miR-4790-3p	hsa-miR-670-3p	hsa-miR-191-3p	hsa-miR-3923
chrX:80532483-80533910+	hsa-miR-605-3p	hsa-miR-6833-3p	hsa-miR-6835-5p	hsa-miR-6865-5p	hsa-miR-6134
chr11:77404552-77413540-	hsa-miR-1236-3p	hsa-miR-6837-3p	hsa-miR-6888-3p	hsa-miR-6815-3p	hsa-miR-4649-3p
chr1:155385535-155429689-	hsa-miR-4515	hsa-miR-7107-5p	hsa-miR-6876-3p	hsa-miR-22-5p	hsa-miR-6728-5p
chr12:112681157-112681813-	hsa-miR-7156-3p	hsa-miR-6801-5p	hsa-miR-6823-5p	hsa-miR-3619-3p	hsa-miR-6502-5p
chr11:11941703-11951112+	hsa-miR-5011-3p	hsa-miR-767-3p	hsa-miR-4493	hsa-miR-3591-3p	hsa-miR-3974
chr5:133685904-133695782-	hsa-miR-155-3p	hsa-miR-4693-5p	hsa-miR-1273e	hsa-miR-1273h-5p	hsa-miR-6796-5p
chr1:100515465-100535241+	hsa-miR-6741-5p	hsa-miR-15b-5p	hsa-miR-3663-3p	hsa-miR-455-3p	hsa-miR-519d-5p
chr3:188017045-188021385+	hsa-miR-18b-5p	hsa-miR-18a-5p	hsa-miR-188-3p	hsa-miR-2117	hsa-miR-367-5p
chr6:34261228-34263462-	hsa-miR-6737-3p	hsa-miR-7162-5p	hsa-miR-5190	hsa-miR-516b-3p	hsa-miR-516a-3p
chr18:39575854-39607512+	hsa-miR-4676-5p	hsa-miR-4459	hsa-miR-185-3p	hsa-miR-3116	hsa-miR-6500-5p
chr11:85737334-85742653-	hsa-miR-4720-3p	hsa-miR-1244	hsa-miR-632	hsa-miR-574-3p	hsa-miR-4635
chr10:24909369-24959172-	hsa-miR-4707-3p	hsa-miR-8075	hsa-miR-4708-5p	hsa-miR-1295b-3p	hsa-miR-3132
chr9:35724569-35725318-	hsa-miR-509-3p	hsa-miR-1236-3p	hsa-miR-338-3p	hsa-miR-3657	hsa-miR-6875-3p
chr8:17123416-17137952+	hsa-miR-7847-3p	hsa-miR-6894-5p	hsa-miR-766-5p	hsa-miR-4760-3p	hsa-miR-3121-5p
chr1:186375215-186388209+	hsa-miR-4305	hsa-miR-6499-5p	hsa-miR-487a-3p	hsa-miR-566	hsa-miR-1537-5p
chr3:130678119-130683889+	hsa-miR-548v	hsa-miR-3150a-3p	hsa-miR-5685	hsa-miR-145-5p	hsa-miR-328-3p
chr20:33057989-33058350+	hsa-miR-1277-5p	hsa-miR-7152-3p	hsa-miR-3670	hsa-miR-3915	hsa-miR-224-5p
chr21:30701808-30702014+	hsa-miR-4762-3p	hsa-miR-7159-5p	hsa-miR-2681-3p	hsa-miR-3682-5p	hsa-miR-490-5p
chr10:115403268-115403432-	hsa-miR-1254	hsa-miR-4786-5p	hsa-miR-3678-3p	hsa-miR-4715-5p	hsa-miR-759
chr16:23955210-24046868+	hsa-miR-1268b	hsa-miR-1268a	hsa-miR-3940-3p	hsa-miR-6774-5p	hsa-miR-1199-3p
chr1:1747195-1749314-	hsa-miR-4435	hsa-miR-933	hsa-miR-6761-5p	hsa-miR-5193	hsa-miR-3156-3p
chr17:40481428-40481794-	hsa-miR-3158-5p	hsa-miR-4469	hsa-miR-6728-3p	hsa-miR-4497	hsa-miR-188-3p
chr2:101182965-101186183+	hsa-miR-877-3p	hsa-miR-5193	hsa-miR-7109-5p	hsa-miR-7114-3p	hsa-miR-125a-5p
chr16:14678204-14678648-	hsa-miR-569	hsa-miR-488-3p	hsa-miR-6757-5p	hsa-miR-6730-5p	hsa-miR-4764-5p
chr2:187540331-187540654+	hsa-miR-6780a-3p	hsa-miR-25-3p	hsa-miR-363-3p	hsa-miR-7703	hsa-miR-29a-5p
chrX:117700537-117727300+	hsa-miR-5187-3p	hsa-miR-3128	hsa-miR-4725-5p	hsa-miR-3136-3p	hsa-miR-5088-5p
chr8:48206456-48206619+	hsa-miR-6877-3p	hsa-miR-6819-3p	hsa-miR-4704-3p	hsa-miR-4655-3p	hsa-miR-6500-3p
chr17:30205269-30205800-	hsa-miR-455-5p	hsa-miR-4301	hsa-miR-4521	hsa-miR-3660	hsa-miR-5581-5p
chr17:27977672-27999147-	hsa-miR-33b-5p	hsa-miR-33a-5p	hsa-miR-4303	hsa-miR-8057	hsa-miR-6795-3p
chr1:151234637-151236504+	hsa-miR-4520-3p	hsa-miR-370-3p	hsa-miR-6812-5p	hsa-miR-6823-5p	hsa-miR-383-3p
chr6:136693639-136710655-	hsa-miR-149-5p	hsa-miR-572	hsa-miR-4656	hsa-miR-4793-3p	hsa-miR-6882-3p
chr13:21429766-21442840-	hsa-miR-641	hsa-miR-3617-5p	hsa-miR-889-5p	hsa-miR-3161	hsa-miR-892b
chr2:152988628-153006743-	hsa-miR-5096	hsa-miR-6780a-3p	hsa-miR-6822-3p	hsa-miR-651-5p	hsa-miR-181d-5p
chr20:24257268-24257446+	hsa-miR-6734-3p	hsa-miR-6752-3p	hsa-miR-3117-5p	hsa-miR-324-3p	hsa-miR-367-5p
chr13:77817194-77818086-	hsa-miR-217	hsa-miR-5587-3p	hsa-miR-22-5p	hsa-miR-6881-3p	hsa-miR-3655
chr2:100046302-100052403-	hsa-let-7f-2-3p	hsa-miR-188-3p	hsa-miR-4686	hsa-miR-194-5p	hsa-miR-6886-3p
chr14:92053546-92126325-	hsa-miR-145-5p	hsa-miR-5195-3p	hsa-miR-4443	hsa-miR-4796-3p	hsa-miR-3065-3p
chr7:33057051-33061711-	hsa-miR-6728-5p	hsa-miR-3607-5p	hsa-miR-181d-5p	hsa-miR-181b-5p	hsa-miR-1248
chr2:208589524-208598771-	hsa-miR-3189-5p	hsa-miR-4707-3p	hsa-miR-3171	hsa-miR-504-3p	hsa-miR-137
chr12:19615444-19626289-	hsa-miR-4707-3p	hsa-miR-3144-3p	hsa-miR-3138	hsa-miR-542-3p	hsa-miR-548ba
chr9:72895675-72901187+	hsa-miR-4708-5p	hsa-miR-4423-5p	hsa-miR-6791-3p	hsa-miR-3977	hsa-miR-6780a-3p
chr7:148851037-148851432+	hsa-miR-3177-3p	hsa-miR-6747-5p	hsa-miR-7110-5p	hsa-miR-6752-5p	hsa-miR-6876-3p
chr3:196626537-196630481+	hsa-miR-9-5p	hsa-miR-522-3p	hsa-miR-5586-5p	hsa-miR-3661	hsa-miR-338-3p
chr13:40121370-40127130-	hsa-miR-6851-5p	hsa-miR-6856-3p	hsa-miR-4690-3p	hsa-miR-3689d	hsa-miR-5685
chr17:57814814-57842499+	hsa-miR-6838-5p	hsa-miR-4800-5p	hsa-miR-1293	hsa-miR-711	hsa-miR-16-5p
chr3:138402520-138413749-	hsa-miR-3928-5p	hsa-miR-520f-3p	hsa-miR-328-5p	hsa-miR-4721	hsa-miR-507
chr22:32883732-32891517+	hsa-miR-6767-5p	hsa-miR-221-3p	hsa-miR-4680-5p	hsa-miR-301a-5p	hsa-miR-370-5p
chr8:110447658-110448312+	hsa-miR-424-5p	hsa-miR-497-5p	hsa-miR-15a-5p	hsa-miR-15b-5p	hsa-miR-218-5p
chr8:141856359-141857700-	hsa-miR-1911-5p	hsa-miR-1200	hsa-miR-5193	hsa-miR-1275	hsa-miR-6843-3p
chr4:146744574-146770713-	hsa-miR-6871-5p	hsa-miR-6881-3p	hsa-miR-637	hsa-miR-612	hsa-miR-4720-5p
chr8:125516512-125535243-	hsa-miR-3122	hsa-miR-509-3-5p	hsa-miR-3591-3p	hsa-miR-376a-2-5p	hsa-miR-21-3p
chr10:46224310-46235694+	hsa-miR-378i	hsa-miR-378c	hsa-miR-378a-3p	hsa-miR-378d	hsa-miR-6828-3p
chr17:41209069-41215968-	hsa-miR-384	hsa-miR-301a-5p	hsa-miR-4535	hsa-miR-6875-3p	hsa-miR-6780a-3p
chr20:19531834-19566188+	hsa-miR-30b-3p	hsa-miR-6825-5p	hsa-miR-663b	hsa-miR-6785-3p	hsa-miR-4323
chr10:34739245-34834216-	hsa-miR-6795-5p	hsa-miR-6887-5p	hsa-miR-4707-3p	hsa-miR-6512-3p	hsa-miR-6845-5p
chr18:39535222-39600669+	hsa-miR-6738-3p	hsa-miR-370-5p	hsa-miR-7843-3p	hsa-miR-6769a-3p	hsa-miR-369-5p
chr2:238628166-238636578+	hsa-miR-604	hsa-miR-6859-3p	hsa-miR-3691-3p	hsa-miR-506-5p	hsa-miR-6816-3p
chr5:144852173-144852878-	hsa-miR-516b-5p	hsa-miR-922	hsa-miR-1273h-5p	hsa-miR-30b-3p	hsa-miR-561-5p
chr9:135865129-135865294+	hsa-miR-4758-5p	hsa-miR-4763-3p	hsa-miR-6722-3p	hsa-miR-4493	hsa-miR-8071
chr12:459787-475270-	hsa-miR-377-3p	hsa-miR-942-5p	hsa-miR-4727-5p	hsa-miR-3164	hsa-miR-4720-5p
chr11:101416592-101448221-	hsa-miR-5699-5p	hsa-miR-1913	hsa-miR-6724-5p	hsa-miR-324-3p	hsa-miR-6773-5p
chr18:9588087-9595100-	hsa-miR-5004-5p	hsa-miR-6736-3p	hsa-miR-4686	hsa-miR-130b-5p	hsa-miR-4771
chr8:110422094-110439385+	hsa-miR-635	hsa-miR-22-3p	hsa-miR-4418	hsa-miR-504-3p	hsa-miR-6740-3p
chr5:75866405-75896797+	hsa-miR-4642	hsa-miR-1273g-3p	hsa-miR-219a-1-3p	hsa-miR-4690-5p	hsa-miR-342-5p
chr11:45975078-45991455-	hsa-miR-6751-5p	hsa-miR-4462	hsa-miR-6745	hsa-miR-6799-5p	hsa-miR-8078
chr20:43610470-43615937+	hsa-miR-3182	hsa-miR-4666b	hsa-miR-4323	hsa-miR-2054	hsa-miR-2116-5p
chr14:31388172-31398517-	hsa-miR-6866-5p	hsa-miR-328-3p	hsa-miR-485-5p	hsa-miR-486-3p	hsa-miR-6851-3p
chr7:132732941-132738938+	hsa-miR-2682-3p	hsa-miR-6781-3p	hsa-miR-5698	hsa-miR-7111-5p	hsa-miR-6870-5p
chr11:76637601-76670075+	hsa-miR-4539	hsa-miR-3130-3p	hsa-miR-6828-5p	hsa-miR-340-3p	hsa-miR-6827-3p
chr6:137015278-137041727-	hsa-miR-4669	hsa-miR-301a-3p	hsa-miR-3666	hsa-miR-199b-5p	hsa-miR-3127-3p
chr1:236976038-236998987+	hsa-miR-670-5p	hsa-miR-4421	hsa-miR-3619-3p	hsa-miR-1324	hsa-miR-8075
chr10:58504118-58504267+	hsa-miR-664a-5p	hsa-miR-6739-3p	hsa-miR-4677-5p	hsa-miR-378h	hsa-miR-216b-5p
chr11:76670023-76709865+	hsa-miR-548ag	hsa-miR-548ba	hsa-miR-548ai	hsa-miR-570-5p	hsa-miR-548g-3p
chr3:142131386-142133133-	hsa-miR-3064-5p	hsa-miR-3591-3p	hsa-miR-223-3p	hsa-miR-1246	hsa-miR-6504-5p
chr19:12693664-12694370-	hsa-miR-4661-3p	hsa-miR-656-5p	hsa-miR-1972	hsa-miR-4635	hsa-miR-5010-3p
chr1:93677658-93692006+	hsa-miR-152-5p	hsa-miR-5089-3p	hsa-miR-127-5p	hsa-miR-3916	hsa-miR-4445-5p
chr9:17226201-17239295+	hsa-miR-891a-3p	hsa-miR-1285-3p	hsa-miR-3169	hsa-miR-1247-3p	hsa-miR-6895-3p
chr5:61657069-61659147+	hsa-miR-4436b-5p	hsa-miR-1260b	hsa-miR-5700	hsa-miR-346	hsa-miR-448
chrY:15522873-15582109-	hsa-miR-4731-5p	hsa-miR-548g-3p	hsa-miR-33a-5p	hsa-miR-141-5p	hsa-miR-212-5p
chr3:155608457-155633868+	hsa-miR-6780a-5p	hsa-miR-515-5p	hsa-miR-1273h-5p	hsa-miR-510-5p	hsa-miR-519e-5p
chr16:31388321-31388586+	hsa-miR-7156-5p	hsa-miR-3192-5p	hsa-miR-6840-3p	hsa-miR-7152-3p	hsa-miR-6131
chr22:29105994-29108005-	hsa-miR-4482-3p	hsa-miR-4502	hsa-miR-346	hsa-miR-8075	hsa-miR-4652-3p
chr2:9437429-9468040+	hsa-miR-7706	hsa-miR-4747-5p	hsa-miR-3137	hsa-miR-3127-3p	hsa-miR-5196-5p
chr13:33091994-33095586-	hsa-miR-329-3p	hsa-miR-7847-3p	hsa-miR-4716-5p	hsa-miR-6881-3p	hsa-miR-765
chr18:43571868-43572168-	hsa-miR-6741-5p	hsa-miR-3689b-3p	hsa-miR-3689c	hsa-miR-3192-5p	hsa-miR-370-3p
chr4:116460836-116462072+	hsa-miR-5695	hsa-miR-7843-3p	hsa-miR-589-3p	hsa-miR-6847-5p	hsa-miR-3913-3p
chr14:56078737-56086030+	hsa-miR-7157-5p	hsa-miR-5706	hsa-miR-4782-5p	hsa-miR-4310	hsa-miR-6868-3p
chr15:56207482-56209109-	hsa-miR-5589-3p	hsa-miR-3192-5p	hsa-miR-4430	hsa-miR-1245b-3p	hsa-miR-3652
chr6:36057458-36063643+	hsa-miR-922	hsa-miR-5704	hsa-miR-4685-5p	hsa-miR-1913	hsa-miR-4761-3p
chr15:50294350-50311173-	hsa-miR-4434	hsa-miR-15a-5p	hsa-miR-576-5p	hsa-miR-4778-3p	hsa-miR-4291
chr16:14093132-14093289-	hsa-miR-450a-2-3p	hsa-miR-6810-5p	hsa-miR-8086	hsa-miR-4474-3p	hsa-miR-1273g-3p
chr3:28293203-28304871+	hsa-miR-4326	hsa-miR-7109-5p	hsa-miR-7108-5p	hsa-miR-29b-3p	hsa-miR-29c-3p
chr14:53003437-53011089-	hsa-miR-4277	hsa-miR-4659a-3p	hsa-miR-4659b-3p	hsa-miR-3921	hsa-miR-2467-3p
chr18:67577533-67614768-	hsa-miR-3936	hsa-miR-370-3p	hsa-miR-6893-3p	hsa-miR-6775-5p	hsa-miR-5004-5p
chr9:123850574-123852683+	hsa-miR-5191	hsa-miR-6730-5p	hsa-miR-4757-5p	hsa-miR-3927-3p	hsa-miR-5007-5p
chr4:25260659-25270825+	hsa-miR-4742-5p	hsa-miR-136-5p	hsa-miR-1206	hsa-miR-6791-3p	hsa-miR-4502
chr7:90350138-90377090+	hsa-miR-4676-3p	hsa-miR-4685-5p	hsa-miR-3127-5p	hsa-miR-369-3p	hsa-miR-4728-5p
chr2:48725632-48738607+	hsa-miR-4793-5p	hsa-miR-103a-3p	hsa-miR-107	hsa-miR-3194-5p	hsa-miR-3591-5p
chr11:86778736-86802437+	hsa-miR-6868-5p	hsa-miR-4441	hsa-miR-1289	hsa-miR-593-5p	hsa-miR-6754-5p
chr11:10794674-10797180+	hsa-miR-942-5p	hsa-miR-6891-3p	hsa-miR-1229-3p	hsa-miR-6511b-3p	hsa-miR-6511a-3p
chr4:84223303-84234440-	hsa-miR-3136-3p	hsa-miR-619-3p	hsa-miR-5009-5p	hsa-miR-197-3p	hsa-miR-4686
chr17:17782941-17810845-	hsa-miR-1227-5p	hsa-miR-675-5p	hsa-miR-6817-5p	hsa-miR-4664-3p	hsa-miR-3127-5p
chr3:38904686-38921614-	hsa-miR-3182	hsa-miR-3065-3p	hsa-miR-6512-3p	hsa-miR-7161-5p	hsa-miR-3064-5p
chr17:56774054-56774220+	hsa-miR-6754-3p	hsa-miR-6511b-5p	hsa-miR-6727-3p	hsa-miR-412-3p	hsa-miR-4735-3p
chr3:185332352-185341870+	hsa-miR-4793-5p	hsa-miR-514a-3p	hsa-miR-134-3p	hsa-miR-6807-5p	hsa-miR-4423-3p
chr15:63951935-63956793-	hsa-miR-4778-3p	hsa-miR-6808-3p	hsa-miR-2115-5p	hsa-miR-5708	hsa-miR-7974
chr21:46631332-46631854+	hsa-miR-6849-5p	hsa-miR-4447	hsa-miR-6846-5p	hsa-miR-6750-5p	hsa-miR-6848-5p
chr6:155095123-155114110+	hsa-miR-3934-5p	hsa-miR-889-5p	hsa-miR-1915-3p	hsa-miR-4427	hsa-miR-6813-5p
chr1:35470733-35474525-	hsa-miR-199b-3p	hsa-miR-199a-3p	hsa-miR-8075	hsa-miR-3190-3p	hsa-miR-6884-3p
chr4:16212747-16215521-	hsa-miR-1254	hsa-miR-4474-5p	hsa-miR-891b	hsa-miR-4709-3p	hsa-miR-4518
chr20:46252655-46256767-	hsa-miR-637	hsa-miR-3160-3p	hsa-miR-4534	hsa-miR-500a-5p	hsa-miR-3202
chr1:36499775-36509149+	hsa-miR-4455	hsa-miR-891a-3p	hsa-miR-6838-5p	hsa-miR-519d-5p	hsa-miR-15a-5p
chr1:200539039-200544819-	hsa-miR-548q	hsa-miR-26b-3p	hsa-miR-22-5p	hsa-miR-30c-5p	hsa-miR-297
chr16:87741956-87745049-	hsa-miR-5193	hsa-miR-6854-3p	hsa-miR-6715a-3p	hsa-miR-6760-3p	hsa-miR-6789-3p
chr2:219341563-219350983-	hsa-miR-550b-2-5p	hsa-miR-7157-5p	hsa-miR-4310	hsa-miR-511-5p	hsa-miR-3910
chr19:55538946-55539230-	hsa-miR-135b-3p	hsa-miR-4467	hsa-miR-6846-5p	hsa-miR-6779-3p	hsa-miR-1228-5p
chr4:148886175-148887990+	hsa-miR-4765	hsa-miR-6875-3p	hsa-miR-3692-3p	hsa-miR-3191-5p	hsa-miR-3064-3p
chr19:41242891-41243674+	hsa-miR-1825	hsa-miR-6894-3p	hsa-miR-3179	hsa-miR-5092	hsa-miR-6870-5p
chr8:132875564-132875753-	hsa-miR-4726-3p	hsa-miR-4633-5p	hsa-miR-5088-3p	hsa-miR-6875-3p	hsa-miR-3917
chrY:2590668-2594414+	hsa-miR-127-5p	hsa-miR-3908	hsa-miR-6756-3p	hsa-miR-4532	hsa-miR-3622b-3p
chr3:47163873-47164035-	hsa-miR-500a-3p	hsa-miR-520f-5p	hsa-miR-3691-3p	hsa-miR-107	hsa-miR-103a-3p
chr10:35321363-35328010-	hsa-miR-4666b	hsa-miR-597-3p	hsa-miR-4678	hsa-miR-1301-3p	hsa-miR-4660
chr10:17742190-17747740+	hsa-miR-4660	hsa-miR-760	hsa-miR-6874-3p	hsa-miR-148a-5p	hsa-miR-103a-3p
chr9:103310026-103323802+	hsa-miR-548f-3p	hsa-miR-6768-5p	hsa-miR-23a-3p	hsa-miR-23b-3p	hsa-miR-548az-3p
chr14:73574534-73578958+	hsa-miR-149-5p	hsa-miR-412-3p	hsa-miR-877-3p	hsa-miR-4268	hsa-miR-6754-3p
chr1:64017396-64018992+	hsa-miR-1303	hsa-miR-3664-3p	hsa-miR-4517	hsa-miR-135a-5p	hsa-miR-135b-5p
chr16:256003-258187-	hsa-miR-6738-3p	hsa-miR-3972	hsa-miR-4724-3p	hsa-miR-660-3p	hsa-miR-6769a-3p
chr16:17548979-17552647-	hsa-miR-541-3p	hsa-miR-711	hsa-miR-4667-5p	hsa-miR-6848-5p	hsa-miR-6508-3p
chr7:30468990-30475697-	hsa-miR-6836-5p	hsa-miR-6738-3p	hsa-miR-1202	hsa-miR-563	hsa-miR-6071
chr9:4884162-4884713+	hsa-miR-4715-3p	hsa-miR-3189-5p	hsa-miR-6846-3p	hsa-miR-4687-5p	hsa-miR-4763-3p
chrX:67454329-67518938-	hsa-miR-545-3p	hsa-miR-34a-3p	hsa-miR-7843-3p	hsa-miR-6511a-3p	hsa-miR-1184
chr8:25156460-25158173+	hsa-miR-3911	hsa-miR-432-5p	hsa-miR-4420	hsa-miR-5699-5p	hsa-miR-15a-3p
chr9:114886537-114919893-	hsa-miR-4738-3p	hsa-miR-6752-5p	hsa-miR-203a-5p	hsa-miR-7110-5p	hsa-miR-1914-3p
chr12:51500308-51510203-	hsa-miR-500a-3p	hsa-miR-6888-3p	hsa-miR-7843-3p	hsa-miR-3160-5p	hsa-miR-8059
chr7:43129891-43130075-	hsa-miR-3925-3p	hsa-miR-212-3p	hsa-miR-132-3p	hsa-miR-3664-5p	hsa-miR-6794-3p
chr10:112704001-112745523+	hsa-miR-4730	hsa-miR-4440	hsa-miR-1268a	hsa-miR-1268b	hsa-miR-487b-5p
chr15:91524114-91525211-	hsa-miR-130b-5p	hsa-miR-544a	hsa-miR-515-5p	hsa-miR-519d-5p	hsa-miR-519e-5p
chr8:142170731-142173528-	hsa-miR-8073	hsa-miR-1827	hsa-miR-370-3p	hsa-miR-221-5p	hsa-miR-4297
chr8:17829838-17830196+	hsa-miR-8077	hsa-miR-4772-5p	hsa-miR-1243	hsa-miR-376a-2-5p	hsa-miR-6754-3p
chr6:116966877-116982009-	hsa-miR-5581-3p	hsa-miR-3667-3p	hsa-miR-544a	hsa-miR-6757-3p	hsa-miR-4743-3p
chr6:83806644-83810605+	hsa-miR-221-3p	hsa-miR-653-3p	hsa-miR-1282	hsa-miR-7161-3p	hsa-miR-512-3p
chr5:171509330-171510088-	hsa-miR-127-3p	hsa-miR-4467	hsa-miR-490-3p	hsa-miR-5047	hsa-miR-3177-3p
chr10:131967697-131969900+	hsa-miR-1276	hsa-miR-7162-5p	hsa-miR-516b-3p	hsa-miR-516a-3p	hsa-miR-3180-5p
chr18:59764914-59770135-	hsa-miR-670-5p	hsa-miR-4533	hsa-miR-454-5p	hsa-miR-6879-5p	hsa-miR-4436b-3p
chr1:226453234-226475498-	hsa-miR-4728-3p	hsa-miR-339-5p	hsa-miR-4772-3p	hsa-miR-6746-3p	hsa-miR-3192-5p
chr1:235383108-235394504-	hsa-miR-4778-3p	hsa-miR-5193	hsa-miR-7111-3p	hsa-miR-877-3p	hsa-miR-627-3p
chr3:131181593-131190123-	hsa-miR-548au-3p	hsa-miR-760	hsa-miR-4438	hsa-miR-8076	hsa-miR-4314
chr4:39878613-39878773-	hsa-miR-3158-5p	hsa-miR-758-3p	hsa-miR-7107-3p	hsa-miR-6753-3p	hsa-miR-593-3p
chr1:244723970-244724447+	hsa-miR-130b-3p	hsa-miR-4421	hsa-miR-130a-3p	hsa-miR-301a-3p	hsa-miR-301b-3p
chr6:136932420-136958544-	hsa-miR-6737-3p	hsa-miR-6780a-3p	hsa-miR-515-3p	hsa-miR-4686	hsa-miR-6506-5p
chr18:6263946-6312055-	hsa-miR-3614-3p	hsa-miR-877-3p	hsa-miR-34a-5p	hsa-miR-449a	hsa-miR-449b-5p
chr1:21377359-21415706+	hsa-miR-489-5p	hsa-miR-6867-5p	hsa-miR-6879-3p	hsa-miR-5095	hsa-miR-1204
chr6:144612873-144613043+	hsa-miR-892b	hsa-miR-3909	hsa-miR-4420	hsa-miR-6852-3p	hsa-miR-3691-3p
chr3:50129476-50140599+	hsa-miR-1470	hsa-miR-7161-3p	hsa-miR-33a-5p	hsa-miR-4421	hsa-miR-33b-5p
chr16:77243042-77243205-	hsa-miR-3714	hsa-miR-6501-3p	hsa-miR-642a-5p	hsa-miR-4711-3p	hsa-miR-4763-3p
chr17:58342773-58372162-	hsa-miR-6776-3p	hsa-miR-4254	hsa-miR-4653-5p	hsa-miR-615-5p	hsa-miR-3614-3p
chr19:12360793-12361183-	hsa-miR-3677-5p	hsa-miR-4661-3p	hsa-miR-593-3p	hsa-miR-1262	hsa-miR-660-3p
chr14:52485779-52487342-	hsa-miR-2467-3p	hsa-miR-6830-5p	hsa-miR-4294	hsa-miR-6801-5p	hsa-miR-4695-3p
chr16:64881105-64881269-	hsa-miR-7111-3p	hsa-miR-4646-3p	hsa-miR-3667-3p	hsa-miR-6769b-3p	hsa-miR-4723-3p
chr1:235316021-235318427-	hsa-miR-4778-3p	hsa-miR-892a	hsa-miR-4733-3p	hsa-miR-487b-3p	hsa-miR-4659b-3p
chr2:61304055-61315603+	hsa-miR-6818-5p	hsa-miR-26b-5p	hsa-miR-26a-5p	hsa-miR-3606-5p	hsa-miR-3124-5p
chr2:234098496-234102607+	hsa-miR-8075	hsa-miR-7976	hsa-miR-3663-5p	hsa-miR-6503-5p	hsa-miR-6769b-5p
chr4:42545934-42577716-	hsa-miR-6875-3p	hsa-miR-4666b	hsa-miR-8082	hsa-miR-548av-3p	hsa-miR-542-3p
chr20:60572606-60574164-	hsa-miR-1294	hsa-miR-1976	hsa-miR-3121-5p	hsa-miR-3940-3p	hsa-miR-6780a-3p
chr12:132528722-132529498+	hsa-miR-1281	hsa-miR-6805-5p	hsa-miR-8072	hsa-miR-6756-5p	hsa-miR-3960
chr3:57618992-57627474-	hsa-miR-599	hsa-miR-924	hsa-miR-3613-5p	hsa-miR-6515-3p	hsa-miR-7108-5p
chr20:34389413-34446303+	hsa-miR-1238-3p	hsa-miR-27a-3p	hsa-miR-6816-3p	hsa-miR-3165	hsa-miR-3169
chr1:32495899-32498935+	hsa-miR-4691-5p	hsa-miR-129-2-3p	hsa-miR-129-1-3p	hsa-miR-508-3p	hsa-miR-212-5p
chr8:30538421-30539578-	hsa-miR-99a-3p	hsa-miR-99b-3p	hsa-miR-4651	hsa-miR-135a-5p	hsa-miR-6074
chr17:65882244-65890281+	hsa-miR-4536-5p	hsa-miR-330-5p	hsa-miR-326	hsa-miR-5009-5p	hsa-miR-1324
chr9:17457522-17487064+	hsa-miR-6738-3p	hsa-miR-4727-5p	hsa-miR-5581-3p	hsa-miR-4759	hsa-miR-3614-3p
chr15:53456916-53457084-	hsa-miR-4786-5p	hsa-miR-6752-5p	hsa-miR-6510-5p	hsa-miR-6716-5p	hsa-miR-761
chrM:1999-2285+	hsa-miR-609	hsa-miR-6509-5p	hsa-miR-4450	hsa-miR-4315	hsa-miR-5089-5p
chr1:8852463-8852647-	hsa-miR-4783-3p	hsa-miR-21-3p	hsa-miR-4663	hsa-miR-588	hsa-miR-942-5p
chr14:103130128-103148315+	hsa-miR-3194-3p	hsa-miR-1273g-3p	hsa-miR-6825-5p	hsa-miR-4682	hsa-miR-4755-5p
chr15:93543742-93547981+	hsa-miR-3124-3p	hsa-miR-130b-5p	hsa-miR-4273	hsa-miR-7112-3p	hsa-miR-5196-3p
chr7:72617463-72619498+	hsa-miR-2115-5p	hsa-miR-892b	hsa-miR-1273e	hsa-miR-3182	hsa-miR-3652
chr1:115161007-115164686-	hsa-miR-4778-3p	hsa-miR-4760-5p	hsa-miR-4724-3p	hsa-miR-642a-5p	hsa-miR-6754-3p
chr21:33825620-33830028-	hsa-miR-4768-3p	hsa-miR-4763-5p	hsa-miR-6778-3p	hsa-miR-4726-3p	hsa-miR-363-5p
chr18:77170403-77171501+	hsa-miR-3141	hsa-miR-4706	hsa-miR-4649-5p	hsa-miR-6813-5p	hsa-miR-4749-5p
chr1:23381562-23395644+	hsa-miR-548ag	hsa-miR-5699-3p	hsa-miR-3161	hsa-miR-570-5p	hsa-miR-548ai
chr12:105742380-105789491+	hsa-miR-3180-3p	hsa-miR-6749-3p	hsa-miR-4634	hsa-miR-4707-3p	hsa-miR-7160-3p
chrX:2326786-2343345-	hsa-miR-4662a-5p	hsa-miR-215-3p	hsa-miR-1251-3p	hsa-miR-4659b-3p	hsa-miR-4659a-3p
chr18:116842-118504+	hsa-miR-6879-5p	hsa-miR-608	hsa-miR-96-5p	hsa-miR-1200	hsa-miR-424-5p
chr2:178083765-178086861+	hsa-miR-2054	hsa-miR-1184	hsa-miR-20b-3p	hsa-miR-3928-5p	hsa-miR-502-5p
chr6:76330009-76344527+	hsa-miR-656-5p	hsa-miR-760	hsa-miR-4768-3p	hsa-miR-6771-5p	hsa-miR-6860
chr9:113547093-113547260-	hsa-miR-877-3p	hsa-miR-5193	hsa-miR-6868-3p	hsa-miR-4757-3p	hsa-miR-5001-3p
chr5:95099212-95119667+	hsa-miR-1202	hsa-miR-647	hsa-miR-4722-5p	hsa-miR-5700	hsa-miR-586
chr8:109149473-109149677+	hsa-miR-6865-5p	hsa-miR-4433a-3p	hsa-miR-520e	hsa-miR-4680-5p	hsa-miR-6815-5p
chr6:146214351-146216113-	hsa-miR-15a-5p	hsa-miR-4688	hsa-miR-16-5p	hsa-miR-3977	hsa-miR-195-5p
chr8:30915888-30925843+	hsa-miR-3660	hsa-miR-647	hsa-miR-454-3p	hsa-miR-5000-3p	hsa-miR-1260b
chr6:133013362-133015321-	hsa-miR-1227-3p	hsa-miR-6794-5p	hsa-miR-3688-5p	hsa-miR-4529-5p	hsa-miR-3607-5p
chr19:9873958-9879043-	hsa-miR-3922-3p	hsa-miR-340-3p	hsa-miR-3176	hsa-miR-3688-5p	hsa-miR-1285-3p
chr11:66985202-66986874+	hsa-miR-31-3p	hsa-miR-135a-3p	hsa-miR-217	hsa-miR-500b-3p	hsa-miR-6757-5p
chr15:89843031-89844673+	hsa-miR-4653-5p	hsa-miR-5088-5p	hsa-miR-6774-5p	hsa-miR-942-5p	hsa-miR-4639-5p
chr20:18523663-18535034+	hsa-miR-3679-5p	hsa-miR-3976	hsa-miR-4253	hsa-miR-296-5p	hsa-miR-3169
chr7:26235467-26236101-	hsa-miR-7152-3p	hsa-miR-7151-5p	hsa-miR-6890-3p	hsa-miR-5193	hsa-miR-4769-3p
chr3:100002451-100018175+	hsa-miR-548ai	hsa-miR-570-5p	hsa-miR-548ag	hsa-miR-4462	hsa-miR-10b-3p
chr3:93611777-93629549-	hsa-miR-93-3p	hsa-miR-6071	hsa-miR-4686	hsa-miR-136-5p	hsa-miR-4765
chr3:137947760-137953956+	hsa-miR-6861-5p	hsa-miR-4539	hsa-miR-6851-3p	hsa-miR-1294	hsa-miR-3126-3p
chr2:219328029-219344438-	hsa-miR-3910	hsa-miR-760	hsa-miR-4720-5p	hsa-miR-125a-5p	hsa-miR-5695
chr1:90475647-90484343+	hsa-miR-6881-3p	hsa-miR-606	hsa-miR-329-5p	hsa-miR-4649-3p	hsa-miR-1262
chr5:149921132-149922533+	hsa-miR-6877-5p	hsa-miR-450a-1-3p	hsa-miR-4776-5p	hsa-miR-4632-5p	hsa-miR-1271-3p
chr2:24181171-24194284+	hsa-miR-4445-5p	hsa-miR-516b-3p	hsa-miR-516a-3p	hsa-miR-3065-5p	hsa-miR-556-3p
chr16:69703885-69724874+	hsa-miR-4634	hsa-miR-3144-5p	hsa-miR-204-5p	hsa-miR-211-5p	hsa-miR-6832-3p
chr12:6657591-6657991-	hsa-miR-5193	hsa-miR-6749-3p	hsa-miR-3944-3p	hsa-miR-1184	hsa-miR-7160-5p
chr20:45910846-45923523-	hsa-miR-4711-5p	hsa-miR-6511b-5p	hsa-miR-187-5p	hsa-miR-1299	hsa-miR-1322
chr12:3907825-3908002-	hsa-miR-6873-3p	hsa-miR-6833-3p	hsa-miR-3692-3p	hsa-miR-4768-5p	hsa-miR-141-5p
chr12:45814854-45816845+	hsa-miR-6751-5p	hsa-miR-4739	hsa-miR-149-3p	hsa-miR-647	hsa-miR-184
chr14:39597484-39601272+	hsa-miR-2114-3p	hsa-miR-3184-3p	hsa-miR-22-3p	hsa-miR-6501-3p	hsa-miR-515-5p
chr13:43537391-43538275-	hsa-miR-942-5p	hsa-miR-208b-5p	hsa-miR-4753-3p	hsa-miR-10b-3p	hsa-miR-516a-3p
chr6:149893421-149893739+	hsa-miR-6748-3p	hsa-miR-6777-3p	hsa-miR-125b-1-3p	hsa-miR-6834-3p	hsa-miR-4639-3p
chr19:34922766-34924317+	hsa-miR-1322	hsa-miR-6823-5p	hsa-miR-4422	hsa-miR-3692-3p	hsa-miR-1179
chr4:83778105-83796975-	hsa-miR-7157-3p	hsa-miR-5008-3p	hsa-miR-6737-3p	hsa-miR-6770-3p	hsa-miR-1912
chr4:57045512-57138658+	hsa-miR-4707-3p	hsa-miR-6778-3p	hsa-miR-642a-5p	hsa-miR-6500-3p	hsa-miR-6075
chr9:135172274-135187243-	hsa-miR-6873-3p	hsa-miR-575	hsa-miR-4676-5p	hsa-miR-3664-3p	hsa-miR-1261
chr4:170398275-170398648-	hsa-miR-1265	hsa-miR-6747-3p	hsa-miR-125b-2-3p	hsa-miR-383-5p	hsa-miR-3156-3p
chr2:107446522-107455133-	hsa-miR-1268b	hsa-miR-1268a	hsa-miR-139-5p	hsa-miR-4640-5p	hsa-miR-4726-5p
chr2:239241465-239242676+	hsa-miR-3928-5p	hsa-miR-4309	hsa-miR-6079	hsa-miR-593-3p	hsa-miR-3198
chr4:128995615-129012299+	hsa-miR-6857-3p	hsa-miR-877-3p	hsa-miR-598-3p	hsa-miR-876-5p	hsa-miR-6832-3p
chr3:107429299-107447807+	hsa-miR-877-3p	hsa-miR-6881-3p	hsa-miR-6843-3p	hsa-miR-5193	hsa-miR-1468-3p
chr7:73520205-73520573-	hsa-miR-3943	hsa-miR-4706	hsa-miR-6777-5p	hsa-miR-515-3p	hsa-miR-3151-5p
chr15:93480748-93499879+	hsa-miR-4639-3p	hsa-miR-138-5p	hsa-miR-4312	hsa-miR-149-5p	hsa-miR-6739-3p
chr10:74937604-74953351+	hsa-miR-890	hsa-miR-5009-5p	hsa-miR-889-5p	hsa-miR-5007-3p	hsa-miR-767-3p
chr12:27521195-27530497+	hsa-miR-1303	hsa-miR-6717-5p	hsa-miR-6766-5p	hsa-miR-378a-5p	hsa-miR-4644
chrX:67494580-67518938-	hsa-miR-545-3p	hsa-miR-34a-3p	hsa-miR-1184	hsa-miR-7111-3p	hsa-miR-629-5p
chr7:77261665-77266365+	hsa-miR-3614-3p	hsa-miR-655-5p	hsa-miR-378a-5p	hsa-miR-499b-5p	hsa-miR-552-3p
chr6:20781376-20874661+	hsa-miR-6720-3p	hsa-miR-4700-5p	hsa-miR-4802-3p	hsa-miR-6846-5p	hsa-miR-18a-3p
chr12:108136974-108138438-	hsa-miR-181d-5p	hsa-miR-181b-5p	hsa-miR-141-5p	hsa-miR-3692-5p	hsa-miR-4312
chr15:43440953-43441349+	hsa-miR-3681-5p	hsa-miR-4534	hsa-miR-219b-5p	hsa-miR-648	hsa-miR-8082
chr19:55921241-55921685+	hsa-miR-1290	hsa-miR-489-3p	hsa-miR-3188	hsa-miR-6832-3p	hsa-miR-4731-5p
chr6:126196035-126199516+	hsa-miR-3675-5p	hsa-miR-942-5p	hsa-miR-887-5p	hsa-miR-6776-3p	hsa-miR-584-3p
chr1:29319842-29344954+	hsa-miR-4733-5p	hsa-miR-4730	hsa-miR-3165	hsa-miR-548b-3p	hsa-miR-450a-1-3p
chr1:52279707-52280485-	hsa-miR-5680	hsa-miR-1229-3p	hsa-miR-6511a-3p	hsa-miR-103a-3p	hsa-miR-107
chr4:77893543-77955730+	hsa-miR-6764-5p	hsa-miR-4634	hsa-miR-3679-3p	hsa-miR-4303	hsa-miR-4763-5p
chr1:161071838-161072165+	hsa-miR-4450	hsa-miR-4312	hsa-miR-6891-5p	hsa-miR-302d-3p	hsa-miR-520d-3p
chr11:9308002-9321248-	hsa-miR-582-3p	hsa-miR-6511a-5p	hsa-miR-548p	hsa-miR-1261	hsa-miR-3158-5p
chr9:132848699-132854660+	hsa-miR-6768-3p	hsa-miR-7161-5p	hsa-miR-370-3p	hsa-miR-548u	hsa-miR-942-5p
chr9:127791923-127797019-	hsa-miR-891a-3p	hsa-miR-642a-5p	hsa-miR-5588-3p	hsa-miR-6081	hsa-miR-8059
chr2:42922905-42950175+	hsa-miR-1273h-3p	hsa-miR-4259	hsa-miR-92a-1-5p	hsa-miR-654-5p	hsa-miR-541-3p
chr1:29319842-29320054+	hsa-miR-450a-1-3p	hsa-miR-6841-3p	hsa-miR-3158-3p	hsa-miR-4762-3p	hsa-miR-592
chr1:71530652-71538231-	hsa-miR-6072	hsa-miR-6891-3p	hsa-miR-5580-5p	hsa-miR-655-3p	hsa-miR-2276-5p
chr3:170812793-170812948-	hsa-miR-5011-3p	hsa-miR-6819-3p	hsa-miR-30d-3p	hsa-miR-6877-3p	hsa-miR-30a-3p
chr5:30513885-30514041+	hsa-miR-7162-5p	hsa-miR-6875-3p	hsa-miR-516a-3p	hsa-miR-516b-3p	hsa-miR-6719-3p
chr1:180053153-180059931+	hsa-miR-5194	hsa-miR-4649-3p	hsa-miR-4687-3p	hsa-miR-4638-5p	hsa-miR-8062
chr16:14645878-14649566-	hsa-miR-664a-5p	hsa-miR-4498	hsa-miR-450a-2-3p	hsa-miR-3944-3p	hsa-miR-5001-5p
chr17:74063298-74066525-	hsa-miR-599	hsa-miR-4681	hsa-miR-3928-5p	hsa-miR-3659	hsa-miR-6769a-3p
chr1:171493960-171496983+	hsa-miR-3147	hsa-miR-8069	hsa-miR-6134	hsa-miR-6851-5p	hsa-miR-4736
chr21:16386665-16387546-	hsa-miR-365b-3p	hsa-miR-365a-3p	hsa-miR-8076	hsa-miR-3160-5p	hsa-miR-6751-3p
chr17:66110563-66111319+	hsa-miR-6763-5p	hsa-miR-3150a-3p	hsa-miR-4459	hsa-miR-6828-5p	hsa-miR-515-5p
chr15:57364851-57384089+	hsa-miR-6876-3p	hsa-miR-6730-5p	hsa-miR-626	hsa-miR-6810-5p	hsa-miR-4446-3p
chr4:141446574-141456984+	hsa-miR-432-5p	hsa-miR-4518	hsa-miR-216b-3p	hsa-miR-639	hsa-miR-6823-5p
chr5:76342172-76342502+	hsa-miR-450a-5p	hsa-miR-653-3p	hsa-miR-6780a-3p	hsa-miR-622	hsa-miR-5190
chr1:21267752-21276604-	hsa-miR-548g-3p	hsa-miR-766-5p	hsa-miR-8082	hsa-miR-6808-5p	hsa-miR-6726-5p
chr9:114919780-114926798-	hsa-miR-504-3p	hsa-miR-519c-3p	hsa-miR-20a-5p	hsa-miR-106a-5p	hsa-miR-17-5p
chr14:59732064-59733332+	hsa-miR-3617-3p	hsa-miR-3616-3p	hsa-miR-1226-5p	hsa-miR-626	hsa-miR-563
chr9:17143286-17226285+	hsa-miR-619-3p	hsa-miR-4753-3p	hsa-miR-490-3p	hsa-miR-3692-3p	hsa-miR-4743-3p
chr9:5123004-5126446+	hsa-miR-8058	hsa-miR-539-3p	hsa-miR-485-3p	hsa-miR-3663-5p	hsa-miR-141-5p
chr12:19496257-19506936+	hsa-miR-3140-5p	hsa-miR-146a-3p	hsa-miR-6886-3p	hsa-miR-5007-5p	hsa-miR-136-5p
chr11:11895347-11901927+	hsa-miR-22-5p	hsa-miR-133a-5p	hsa-miR-4778-3p	hsa-miR-424-5p	hsa-miR-3609
chr15:75699396-75706652-	hsa-miR-608	hsa-miR-4505	hsa-miR-6884-5p	hsa-miR-6737-5p	hsa-miR-4651
chr5:64082351-64100213+	hsa-miR-5193	hsa-miR-4753-3p	hsa-miR-515-5p	hsa-miR-6780a-3p	hsa-miR-877-3p
chr7:138252226-138252399+	hsa-miR-4278	hsa-miR-3605-5p	hsa-miR-4675	hsa-miR-7974	hsa-miR-1255b-5p
chr1:14057495-14068652+	hsa-miR-1306-5p	hsa-miR-188-3p	hsa-miR-7161-3p	hsa-miR-7109-3p	hsa-miR-8057
chr8:130859050-130883742-	hsa-miR-544a	hsa-miR-4704-5p	hsa-miR-6756-5p	hsa-miR-4686	hsa-miR-6766-5p
chr4:7008359-7016284+	hsa-miR-548an	hsa-miR-4653-3p	hsa-miR-6823-5p	hsa-miR-122-3p	hsa-miR-516b-5p
chr2:26505713-26505919+	hsa-miR-532-5p	hsa-miR-1273d	hsa-miR-605-5p	hsa-miR-4435	hsa-miR-4324
chr10:89624211-89685314+	hsa-miR-1296-5p	hsa-miR-1289	hsa-miR-22-3p	hsa-miR-510-5p	hsa-miR-183-5p
chr10:123658356-123662135-	hsa-miR-552-5p	hsa-miR-363-5p	hsa-miR-7978	hsa-miR-4490	hsa-miR-5589-5p
chr3:174236867-174268427+	hsa-miR-449c-5p	hsa-miR-4641	hsa-miR-664b-5p	hsa-miR-7160-5p	hsa-miR-1273g-3p
chr9:134064440-134067679+	hsa-miR-6890-5p	hsa-miR-670-5p	hsa-miR-138-5p	hsa-miR-345-3p
chr2:48555380-48555841+	hsa-miR-582-5p	hsa-miR-8054	hsa-miR-152-5p	hsa-miR-7114-5p	hsa-miR-7109-5p
chr2:217005909-217006204+	hsa-miR-3675-5p	hsa-miR-548s	hsa-miR-3919	hsa-miR-146a-3p	hsa-miR-3190-5p
chr15:35674023-35675038-	hsa-miR-1273a	hsa-miR-6089	hsa-miR-566	hsa-miR-4537	hsa-miR-1273h-5p
chr20:9343543-9353050+	hsa-miR-599	hsa-miR-4529-3p	hsa-miR-6509-3p	hsa-miR-4513	hsa-miR-4265
chr17:2541393-2541614+	hsa-miR-1537-5p	hsa-miR-513b-3p	hsa-miR-29a-3p	hsa-miR-330-5p	hsa-miR-5009-5p
chr10:124919923-124922344+	hsa-miR-605-3p	hsa-miR-4433a-5p	hsa-miR-96-5p	hsa-miR-3127-5p	hsa-miR-188-3p
chr10:35805451-35842113+	hsa-miR-4663	hsa-miR-3126-3p	hsa-miR-4669	hsa-miR-330-5p	hsa-miR-7157-3p
chr7:24663285-24720139+	hsa-miR-3064-3p	hsa-miR-623	hsa-miR-518c-5p	hsa-miR-3915	hsa-miR-3689d
chr5:112102023-112128226+	hsa-miR-337-5p	hsa-miR-7-5p	hsa-miR-8052	hsa-miR-5093	hsa-miR-22-5p
chr14:81589037-81590650-	hsa-miR-6847-5p	hsa-miR-566	hsa-miR-7851-3p	hsa-miR-6826-5p	hsa-miR-183-5p
chr16:16218646-16219768+	hsa-miR-6735-5p	hsa-miR-6823-3p	hsa-miR-4436b-3p	hsa-miR-5008-5p	hsa-miR-485-5p
chr7:76871008-76891624+	hsa-miR-20a-3p	hsa-miR-6873-3p	hsa-miR-6833-3p	hsa-miR-4768-5p	hsa-miR-3920
chr20:43600719-43623898+	hsa-miR-4769-3p	hsa-miR-4666b	hsa-miR-3157-5p	hsa-miR-4323	hsa-miR-3927-5p
chr1:52896685-52901137-	hsa-miR-4640-5p	hsa-miR-450b-3p	hsa-miR-4726-5p	hsa-miR-769-3p	hsa-miR-92a-1-5p
chr8:119694655-119694822+	hsa-miR-6507-5p	hsa-miR-7111-3p	hsa-miR-548bb-3p	hsa-miR-6783-5p	hsa-miR-548ac
chr13:33222891-33250096+	hsa-miR-4764-5p	hsa-miR-6511a-3p	hsa-miR-5009-5p	hsa-miR-3129-5p	hsa-miR-4786-3p
chr9:15187969-15189631-	hsa-miR-2682-3p	hsa-miR-3938	hsa-miR-145-5p	hsa-miR-204-5p	hsa-miR-4427
chr13:49742749-49749677+	hsa-miR-544b	hsa-miR-205-5p	hsa-miR-27a-5p	hsa-miR-8087	hsa-miR-6720-5p
chr10:113284582-113284739-	hsa-miR-381-5p	hsa-miR-6068	hsa-miR-4737	hsa-miR-4778-3p	hsa-miR-609
chr17:30267305-30293215+	hsa-miR-4684-5p	hsa-miR-6739-3p	hsa-miR-19a-3p	hsa-miR-516b-5p	hsa-miR-3160-3p
chr1:192154017-192154342+	hsa-miR-6823-5p	hsa-miR-2116-3p	hsa-miR-410-3p	hsa-miR-367-5p	hsa-miR-4298
chr2:74300676-74307718+	hsa-miR-6756-3p	hsa-miR-3174	hsa-miR-3127-3p	hsa-miR-4640-5p	hsa-miR-6845-5p
chrY:15915380-15953667+	hsa-miR-6770-3p	hsa-miR-5191	hsa-miR-6076	hsa-miR-1273h-5p	hsa-miR-6859-5p
chr15:43294753-43314999-	hsa-miR-518a-5p	hsa-miR-527	hsa-miR-3714	hsa-miR-1306-5p	hsa-miR-449c-5p
chr3:138409842-138417937-	hsa-miR-328-5p	hsa-miR-518f-5p	hsa-miR-526a	hsa-miR-518d-5p	hsa-miR-520c-5p
chr3:30686239-30691952+	hsa-miR-6824-5p	hsa-miR-92b-3p	hsa-miR-6726-5p	hsa-miR-939-5p	hsa-miR-107
chr18:20569184-20581692+	hsa-miR-4283	hsa-miR-5087	hsa-miR-145-3p	hsa-miR-4685-3p	hsa-miR-30c-2-3p
chr3:56694759-56707753-	hsa-miR-3692-3p	hsa-miR-624-3p	hsa-miR-3607-3p	hsa-miR-4320	hsa-miR-1245b-3p
chr15:41988273-41991357+	hsa-miR-6738-3p	hsa-miR-4299	hsa-miR-6881-3p	hsa-miR-2682-3p	hsa-miR-216a-3p
chr4:105471123-105479464-	hsa-miR-3916	hsa-miR-107	hsa-miR-103a-3p	hsa-miR-1184	hsa-miR-486-3p
chr5:109049221-109091157+	hsa-miR-627-5p	hsa-miR-924	hsa-miR-30c-5p	hsa-miR-30b-5p	hsa-miR-3657
chr4:76678650-76692290+	hsa-miR-3607-3p	hsa-miR-6837-3p	hsa-miR-4778-3p	hsa-miR-3074-5p	hsa-miR-500a-3p
chr16:21350242-21363459+	hsa-miR-6767-5p	hsa-miR-4445-3p	hsa-miR-548al	hsa-miR-4462	hsa-miR-4707-3p
chrX:117718698-117724265+	hsa-miR-1185-2-3p	hsa-miR-4725-5p	hsa-miR-1185-1-3p	hsa-miR-4693-5p	hsa-miR-548ao-5p
chr2:170462549-170465268+	hsa-miR-549a	hsa-miR-362-5p	hsa-miR-6826-3p	hsa-miR-4420	hsa-miR-6887-3p
chr7:75630208-75643205-	hsa-miR-3621	hsa-miR-642a-3p	hsa-miR-608	hsa-miR-6745	hsa-miR-6890-5p
chr21:40578062-40584633-	hsa-miR-4713-5p	hsa-miR-550b-3p	hsa-miR-4684-5p	hsa-miR-6878-3p	hsa-miR-132-3p
chr16:56871520-56873516+	hsa-miR-593-5p	hsa-miR-637	hsa-miR-1289	hsa-miR-5088-5p	hsa-miR-6775-5p
chr11:65267881-65268263+	hsa-miR-412-3p	hsa-miR-6754-3p	hsa-miR-3667-3p	hsa-miR-197-3p	hsa-miR-6746-3p
chr15:93467551-93485185+	hsa-miR-6815-3p	hsa-miR-6878-3p	hsa-miR-4312	hsa-miR-6779-5p	hsa-miR-149-5p
chr11:77033407-77033586-	hsa-miR-6511a-5p	hsa-miR-4448	hsa-miR-6813-5p	hsa-miR-499a-3p	hsa-miR-1910-3p
chr14:102506573-102507010+	hsa-miR-6889-5p	hsa-miR-6752-5p	hsa-miR-1281	hsa-miR-939-5p	hsa-miR-608
chr15:75703833-75705386-	hsa-miR-608	hsa-miR-485-5p	hsa-miR-4505	hsa-miR-6884-5p	hsa-miR-4651
chr17:38567606-38569478-	hsa-miR-653-3p	hsa-miR-9-5p	hsa-miR-92a-1-5p	hsa-miR-301a-3p	hsa-miR-301b-3p
chr18:43560071-43595903-	hsa-miR-596	hsa-miR-3921	hsa-miR-4763-5p	hsa-miR-4655-5p	hsa-miR-4653-5p
chr8:381341-385707+	hsa-miR-219b-3p	hsa-miR-599	hsa-miR-25-3p	hsa-miR-92a-3p	hsa-miR-532-5p
chr1:235929379-235933597-	hsa-miR-6775-5p	hsa-miR-4784	hsa-miR-4769-5p	hsa-miR-936	hsa-miR-6727-5p
chrX:74332721-74334666-	hsa-miR-219b-3p	hsa-miR-3677-5p	hsa-miR-7107-3p	hsa-miR-660-3p	hsa-miR-107
chr14:72431489-72500620+	hsa-miR-3177-3p	hsa-miR-6798-5p	hsa-miR-1273g-3p	hsa-miR-4764-5p	hsa-miR-6727-5p
chr10:25144247-25147338-	hsa-miR-2117	hsa-miR-8077	hsa-miR-892b	hsa-miR-6515-3p	hsa-miR-6754-3p
chr10:21903760-21940697+	hsa-miR-4753-3p	hsa-miR-1282	hsa-miR-125a-3p	hsa-miR-2355-3p	hsa-miR-3064-5p
chr21:30532301-30547075+	hsa-miR-5682	hsa-miR-6836-3p	hsa-miR-4503	hsa-miR-4436b-3p	hsa-miR-29b-3p
chr9:37144632-37165932+	hsa-miR-1245b-3p	hsa-miR-6076	hsa-miR-6797-3p	hsa-miR-574-5p	hsa-miR-3618
chr7:65894666-65895004-	hsa-miR-6127	hsa-miR-4520-3p	hsa-miR-6133	hsa-miR-4510	hsa-miR-6129
chr6:166829530-166829724-	hsa-miR-6865-3p	hsa-miR-197-3p	hsa-miR-6884-3p	hsa-miR-6754-3p	hsa-miR-6511a-3p
chr3:33087612-33099761-	hsa-miR-874-5p	hsa-miR-377-5p	hsa-miR-6799-3p	hsa-miR-518c-3p	hsa-miR-5008-5p
chr13:99171497-99171727-	hsa-miR-519d-5p	hsa-miR-6734-3p	hsa-miR-5002-5p	hsa-miR-512-5p	hsa-miR-6852-3p
chr2:85190039-85190246-	hsa-miR-6728-3p	hsa-miR-4685-3p	hsa-miR-4520-3p	hsa-miR-6762-5p	hsa-miR-301a-5p
chr3:136162129-136170989-	hsa-miR-6826-3p	hsa-miR-22-5p	hsa-miR-6887-3p	hsa-miR-3944-3p	hsa-miR-4666b
chr12:57689182-57704246-	hsa-miR-3189-3p	hsa-miR-4294	hsa-miR-4524a-5p	hsa-miR-4524b-5p	hsa-miR-221-5p
chr10:52220433-52226692-	hsa-miR-324-5p	hsa-miR-4736	hsa-miR-19a-5p	hsa-miR-186-3p	hsa-miR-550b-2-5p
chr2:32855590-32859072+	hsa-miR-1245b-3p	hsa-miR-135a-5p	hsa-miR-8081	hsa-miR-767-3p	hsa-miR-1267
chr7:135255853-135258573+	hsa-miR-515-5p	hsa-miR-519e-5p	hsa-miR-103a-2-5p	hsa-miR-519d-5p	hsa-miR-3974
chr2:135694411-135700244+	hsa-miR-5693	hsa-miR-7641	hsa-miR-3605-5p	hsa-miR-1267	hsa-miR-4436b-5p
chr3:132400758-132411662-	hsa-miR-28-5p	hsa-miR-6880-5p	hsa-miR-148b-5p	hsa-miR-614	hsa-miR-4423-5p
chrX:154448487-154464648+	hsa-miR-5586-5p	hsa-miR-4740-5p	hsa-miR-3128	hsa-miR-3144-5p	hsa-miR-200a-5p
chr4:2659530-2661781+	hsa-miR-3605-5p	hsa-miR-22-5p	hsa-miR-6852-5p	hsa-miR-4268	hsa-miR-6726-5p
chr4:71808540-71824757+	hsa-miR-613	hsa-miR-1255b-2-3p	hsa-miR-3127-3p	hsa-miR-7855-5p	hsa-miR-656-5p
chr15:35674023-35675038-	hsa-miR-1273a	hsa-miR-6089	hsa-miR-566	hsa-miR-4537	hsa-miR-1273h-5p
chr5:36211946-36227667-	hsa-miR-3622a-3p	hsa-miR-4473	hsa-miR-1202	hsa-miR-493-3p	hsa-miR-1184
chr15:40938036-40939272+	hsa-miR-6758-3p	hsa-miR-5095	hsa-miR-514a-5p	hsa-miR-7151-5p	hsa-miR-6718-5p
chr1:226453234-226475498-	hsa-miR-4728-3p	hsa-miR-339-5p	hsa-miR-4772-3p	hsa-miR-6746-3p	hsa-miR-3192-5p
chr15:30766559-30773110+	hsa-miR-4720-3p	hsa-miR-544a	hsa-miR-663b	hsa-miR-578	hsa-miR-4680-3p
chr4:129857810-129920949-	hsa-miR-7110-3p	hsa-miR-1236-3p	hsa-miR-4264	hsa-miR-4325	hsa-miR-544a
chr17:20907515-20908303-	hsa-miR-3663-5p	hsa-miR-138-5p	hsa-miR-8069	hsa-miR-3620-5p	hsa-miR-616-3p
chr4:103578839-103611928-	hsa-miR-4722-3p	hsa-miR-5193	hsa-miR-3169	hsa-miR-6727-3p	hsa-miR-4540
chr15:50935537-50941082-	hsa-miR-496	hsa-miR-6516-5p	hsa-miR-3928-5p	hsa-miR-6502-3p	hsa-miR-4503
chr4:151788823-151814301-	hsa-miR-1273d	hsa-miR-6165	hsa-miR-3150a-3p	hsa-miR-5189-5p	hsa-miR-3908
chr14:50287061-50300214-	hsa-miR-1908-3p	hsa-miR-5003-5p	hsa-miR-4632-3p	hsa-miR-4638-5p	hsa-miR-6892-3p
chr6:137015278-137041727-	hsa-miR-4669	hsa-miR-301a-3p	hsa-miR-3666	hsa-miR-199b-5p	hsa-miR-3127-3p
chr11:122563985-122580182+	hsa-miR-5095	hsa-miR-7151-3p	hsa-miR-504-3p	hsa-miR-500b-3p	hsa-miR-5006-5p
chr4:54248445-54266006+	hsa-miR-4718	hsa-miR-764	hsa-miR-1236-3p	hsa-miR-765	hsa-miR-4434
chr1:94685814-94697199-	hsa-miR-132-3p	hsa-miR-6081	hsa-miR-1184	hsa-miR-135b-5p	hsa-miR-135a-5p
chr10:12123471-12136270+	hsa-miR-4685-5p	hsa-miR-136-5p	hsa-miR-4660	hsa-miR-3130-3p	hsa-miR-324-5p
chr5:70337349-70338111-	hsa-miR-134-3p	hsa-miR-1296-3p	hsa-miR-1343-5p	hsa-miR-548ao-3p	hsa-miR-939-5p
chr1:21205775-21212864-	hsa-miR-449b-3p	hsa-miR-3132	hsa-miR-4764-3p	hsa-miR-651-5p	hsa-miR-3977
chr10:20531999-20534434+	hsa-miR-552-3p	hsa-miR-941	hsa-miR-892a	hsa-miR-652-5p	hsa-miR-603
chr11:65267954-65268137+	hsa-miR-412-3p	hsa-miR-6754-3p	hsa-miR-3667-3p	hsa-miR-7703	hsa-miR-7162-5p
chr20:24257268-24257446+	hsa-miR-6734-3p	hsa-miR-6752-3p	hsa-miR-3117-5p	hsa-miR-324-3p	hsa-miR-367-5p
chr5:1611784-1612107-	hsa-miR-6828-3p	hsa-miR-1301-3p	hsa-miR-4526	hsa-miR-4660	hsa-miR-5047
chr17:64509454-64510841+	hsa-miR-1228-3p	hsa-miR-1288-3p	hsa-miR-586	hsa-miR-558	hsa-miR-942-3p
chr9:116046595-116050544+	hsa-miR-1200	hsa-miR-542-3p	hsa-miR-3122	hsa-miR-3680-5p	hsa-miR-1277-3p
chr15:72810408-72837305+	hsa-miR-4795-5p	hsa-miR-4465	hsa-miR-3973	hsa-miR-3616-5p	hsa-miR-5697
chr12:94562929-94580249+	hsa-miR-3927-3p	hsa-miR-3190-5p	hsa-miR-4529-5p	hsa-miR-3668	hsa-miR-193b-3p
chr11:85685751-85742653-	hsa-miR-361-3p	hsa-miR-370-3p	hsa-miR-6769a-3p	hsa-miR-4720-3p	hsa-miR-1244
chr2:169404106-169417832+	hsa-miR-1228-5p	hsa-miR-6815-3p	hsa-miR-3653-5p	hsa-miR-4297	hsa-miR-25-5p
chr14:39597484-39601272+	hsa-miR-2114-3p	hsa-miR-3184-3p	hsa-miR-22-3p	hsa-miR-6501-3p	hsa-miR-515-5p
chr15:56471468-56473752-	hsa-miR-25-3p	hsa-miR-4999-5p	hsa-miR-92a-3p	hsa-miR-6780a-5p	hsa-miR-4325
chr15:50866834-50867986-	hsa-miR-518c-5p	hsa-miR-2113	hsa-miR-579-3p	hsa-miR-4443	hsa-miR-4470
chr10:115403268-115403432-	hsa-miR-1254	hsa-miR-4786-5p	hsa-miR-3678-3p	hsa-miR-4715-5p	hsa-miR-759
chr3:138244332-138291774-	hsa-miR-6893-3p	hsa-miR-370-3p	hsa-miR-519a-3p	hsa-miR-519c-3p	hsa-miR-519b-3p
chr7:124510965-124522520-	hsa-miR-3977	hsa-miR-1231	hsa-miR-875-3p	hsa-miR-4650-3p	hsa-miR-603
chr5:154245002-154247352+	hsa-miR-1245b-3p	hsa-miR-424-5p	hsa-miR-662	hsa-miR-1273g-3p	hsa-miR-504-3p
chr2:68794477-68805135+	hsa-miR-1178-5p	hsa-miR-450a-2-3p	hsa-miR-3065-5p	hsa-miR-6887-3p	hsa-miR-193a-5p
chr18:59739906-59770135-	hsa-miR-502-5p	hsa-miR-3921	hsa-miR-6768-5p	hsa-miR-500a-5p	hsa-miR-145-5p
chr8:93929157-93966792-	hsa-miR-514a-5p	hsa-miR-5591-3p	hsa-miR-519d-5p	hsa-miR-221-5p	hsa-miR-22-3p
chr14:52485779-52487342-	hsa-miR-2467-3p	hsa-miR-6830-5p	hsa-miR-4294	hsa-miR-6801-5p	hsa-miR-4695-3p
chr14:50272739-50298079-	hsa-miR-6838-5p	hsa-miR-424-5p	hsa-miR-15b-5p	hsa-miR-4524a-5p	hsa-miR-107
chr18:67420807-67421658+	hsa-miR-6873-3p	hsa-miR-4438	hsa-miR-4422	hsa-miR-4647	hsa-miR-3135b
chr14:21834598-21838647-	hsa-miR-3160-5p	hsa-miR-4291	hsa-miR-4660	hsa-miR-449c-5p	hsa-miR-646
chr1:172357713-172357949+	hsa-miR-8089	hsa-miR-2861	hsa-miR-663a	hsa-miR-6848-5p	hsa-miR-4667-5p
chr17:35931890-35945538+	hsa-miR-1273h-5p	hsa-miR-6780a-5p	hsa-miR-3689a-3p	hsa-miR-3689b-3p	hsa-miR-3689c
chrM:14414-15491-	hsa-miR-566	hsa-miR-6771-3p	hsa-miR-1306-5p	hsa-miR-4640-3p	hsa-miR-424-5p
chr20:45912315-45927616-	hsa-miR-543	hsa-miR-4711-5p	hsa-miR-1299	hsa-miR-1322	hsa-miR-19b-3p
chr12:66597491-66641834+	hsa-miR-7154-3p	hsa-miR-6810-3p	hsa-miR-7154-5p	hsa-miR-6846-5p	hsa-miR-1-5p
chr19:10274002-10277361-	hsa-miR-4763-5p	hsa-miR-596	hsa-miR-6505-3p	hsa-miR-6737-3p	hsa-miR-6815-3p
chr14:72431489-72500620+	hsa-miR-3177-3p	hsa-miR-6798-5p	hsa-miR-1273g-3p	hsa-miR-4764-5p	hsa-miR-6727-5p
chr8:101232507-101245765+	hsa-miR-3135b	hsa-miR-4707-3p	hsa-miR-6838-3p	hsa-miR-5704	hsa-miR-1248
chr20:18513308-18523046+	hsa-miR-432-3p	hsa-miR-323a-5p	hsa-miR-6741-5p	hsa-miR-23b-3p	hsa-miR-23a-3p
chr10:75227311-75239275-	hsa-miR-6732-3p	hsa-miR-3665	hsa-miR-203a-5p	hsa-miR-4764-5p	hsa-miR-3674
chr4:54265897-54294350-	hsa-miR-6856-5p	hsa-miR-1306-5p	hsa-miR-1248	hsa-miR-2682-5p	hsa-miR-6776-3p
chr10:112704001-112745523+	hsa-miR-4730	hsa-miR-4440	hsa-miR-1268b	hsa-miR-1268a	hsa-miR-487b-5p
chr8:618598-624047-	hsa-miR-6749-3p	hsa-miR-4707-5p	hsa-miR-6763-3p	hsa-miR-5193	hsa-miR-3130-3p
chr20:35177709-35178031+	hsa-miR-328-5p	hsa-miR-6769a-3p	hsa-miR-6840-3p	hsa-miR-3651	hsa-miR-4685-5p
chr4:99955381-99966461+	hsa-miR-4711-5p	hsa-miR-3681-5p	hsa-miR-10b-3p	hsa-miR-4327	hsa-miR-199b-3p
chrM:8399-8609+	hsa-let-7i-5p	hsa-miR-4701-3p	hsa-miR-6127	hsa-miR-8072	hsa-miR-6129
chr5:88100415-88119732-	hsa-miR-942-5p	hsa-miR-6511b-5p	hsa-miR-147a	hsa-miR-7152-5p	hsa-miR-29b-3p
chr8:48812933-48815355-	hsa-miR-6819-5p	hsa-miR-3938	hsa-miR-4477b	hsa-miR-370-3p	hsa-miR-6812-5p
chr13:113219425-113223573-	hsa-miR-7114-5p	hsa-miR-5690	hsa-miR-130b-5p	hsa-miR-4260	hsa-miR-103a-3p
chr1:212529968-212530626+	hsa-miR-7153-5p	hsa-miR-146a-5p	hsa-miR-146b-5p	hsa-miR-3128	hsa-miR-3614-5p
chr10:32832228-32924086+	hsa-miR-6745	hsa-miR-369-5p	hsa-miR-711	hsa-miR-4645-5p	hsa-miR-4742-5p
chr15:30766559-30771396+	hsa-miR-4720-3p	hsa-miR-544a	hsa-miR-663b	hsa-miR-7108-5p	hsa-miR-103b
chr14:55071090-55169298+	hsa-miR-6878-3p	hsa-miR-5699-5p	hsa-miR-4640-3p	hsa-miR-4707-3p	hsa-miR-4746-5p
chr1:220364410-220383831-	hsa-miR-4716-3p	hsa-miR-20a-3p	hsa-miR-6794-5p	hsa-miR-4524a-3p	hsa-miR-4457
chr2:238617187-238629465+	hsa-miR-1237-3p	hsa-miR-6071	hsa-miR-2277-5p	hsa-miR-6760-3p	hsa-miR-6743-3p
chr1:22030755-22048257-	hsa-miR-6753-3p	hsa-miR-30c-1-3p	hsa-miR-5008-5p	hsa-miR-6810-5p	hsa-miR-22-5p
chr1:224592132-224601037-	hsa-miR-374b-3p	hsa-miR-378h	hsa-miR-6501-3p	hsa-miR-6755-3p	hsa-miR-378c
chr7:77394812-77402631+	hsa-miR-4458	hsa-miR-4518	hsa-miR-449a	hsa-miR-449b-5p	hsa-miR-6499-3p
chr3:5212188-5214425+	hsa-miR-1184	hsa-miR-7843-3p	hsa-miR-30e-5p	hsa-miR-96-3p	hsa-miR-6834-3p
chrX:147733520-147744289+	hsa-miR-378h	hsa-miR-378b	hsa-miR-203b-3p	hsa-miR-378c	hsa-miR-378e
chr2:208841375-208842310-	hsa-miR-1200	hsa-miR-133a-5p	hsa-miR-3659	hsa-miR-4522	hsa-miR-5691
chr12:109509417-109511337+	hsa-miR-7973	hsa-miR-627-5p	hsa-miR-6502-3p	hsa-miR-3174	hsa-miR-4736
chrX:80532483-80553856+	hsa-miR-649	hsa-miR-412-5p	hsa-miR-495-5p	hsa-miR-6833-3p	hsa-miR-6835-5p
chr3:15793257-15836813-	hsa-miR-544a	hsa-miR-6876-3p	hsa-miR-1251-5p	hsa-miR-5684	hsa-miR-4790-5p
chr6:108242133-108246136-	hsa-miR-4537	hsa-miR-6499-5p	hsa-miR-619-5p	hsa-miR-7851-3p	hsa-miR-5095
chr15:81552113-81558142+	hsa-miR-135a-3p	hsa-miR-509-5p	hsa-miR-4520-5p	hsa-miR-509-3-5p	hsa-miR-3692-5p
chr6:86246510-86251761-	hsa-miR-219b-3p	hsa-miR-5690	hsa-miR-4469	hsa-miR-196a-3p	hsa-miR-1266-3p
chr18:18547713-18549169-	hsa-miR-6873-3p	hsa-miR-6780a-3p	hsa-miR-3925-3p	hsa-miR-6868-3p	hsa-miR-4762-5p
chr10:113138511-113179489+	hsa-miR-328-5p	hsa-miR-4769-5p	hsa-miR-5193	hsa-miR-4726-3p	hsa-miR-4524a-3p
chr6:64389901-64395812+	hsa-miR-22-5p	hsa-miR-4689	hsa-miR-432-5p	hsa-miR-7151-5p	hsa-miR-515-5p
chr1:147408741-147410931+	hsa-miR-556-5p	hsa-miR-3670	hsa-miR-486-5p
chr11:118630631-118634015-	hsa-miR-5001-3p	hsa-miR-3121-5p	hsa-miR-4638-3p	hsa-miR-6509-5p	hsa-miR-6873-5p
chr16:21350242-21363459+	hsa-miR-6767-5p	hsa-miR-4445-3p	hsa-miR-548al	hsa-miR-4462	hsa-miR-4707-3p
chrX:117718698-117724265+	hsa-miR-1185-2-3p	hsa-miR-4725-5p	hsa-miR-1185-1-3p	hsa-miR-4693-5p	hsa-miR-548ao-5p
chr2:215657021-215661841-	hsa-miR-4704-3p	hsa-miR-1178-3p	hsa-miR-584-3p	hsa-miR-6772-5p	hsa-miR-15b-3p
chr2:217005909-217006204+	hsa-miR-3675-5p	hsa-miR-548s	hsa-miR-3919	hsa-miR-146a-3p	hsa-miR-3190-5p
chr12:57033764-57033976-	hsa-miR-6722-3p	hsa-miR-1909-3p	hsa-miR-4309	hsa-miR-4713-3p	hsa-miR-4661-3p
chr14:35272060-35280242-	hsa-miR-363-5p	hsa-miR-1286	hsa-miR-532-5p	hsa-miR-6759-5p	hsa-miR-143-3p
chr18:51686135-51731527-	hsa-miR-3182	hsa-miR-6739-3p	hsa-miR-7151-5p	hsa-miR-182-5p	hsa-miR-3200-3p
chr12:89853415-89866052-	hsa-miR-6841-5p	hsa-miR-191-5p	hsa-miR-6794-5p	hsa-miR-1229-5p	hsa-miR-6798-5p
chr16:16205232-16205439+	hsa-miR-4643	hsa-miR-455-3p	hsa-miR-4738-5p	hsa-miR-1915-3p	hsa-miR-7160-5p
chr11:82895721-82895950+	hsa-miR-138-5p	hsa-miR-8052	hsa-miR-23b-5p	hsa-miR-3936	hsa-miR-3199
chrX:153577316-153577760-	hsa-miR-615-5p	hsa-miR-6865-5p	hsa-miR-6734-5p	hsa-miR-6793-3p	hsa-miR-4763-3p
chr2:26486248-26492865+	hsa-miR-1287-3p	hsa-miR-504-3p	hsa-miR-4642	hsa-miR-6839-3p
chr10:34834129-34875087-	hsa-miR-4324	hsa-miR-1273a	hsa-miR-4423-3p	hsa-miR-338-3p	hsa-miR-6889-5p
chr8:67383665-67386173+	hsa-miR-3591-3p	hsa-miR-21-3p	hsa-miR-193a-5p	hsa-miR-6758-5p	hsa-miR-1273h-5p
chr3:185879392-185906168-	hsa-miR-5581-5p	hsa-miR-6894-3p	hsa-miR-6747-3p	hsa-miR-4323	hsa-miR-1913
chr2:24360779-24384483+	hsa-miR-548o-3p	hsa-miR-4653-3p	hsa-miR-519d-3p	hsa-miR-3064-3p	hsa-miR-619-5p
chr1:39900086-39905172+	hsa-miR-558	hsa-miR-939-3p	hsa-miR-1244	hsa-miR-135a-5p	hsa-miR-6724-5p
chr2:120634899-120643458+	hsa-miR-141-5p	hsa-miR-127-5p	hsa-miR-450b-5p	hsa-miR-7111-3p	hsa-miR-4723-3p
chr12:133624541-133625434+	hsa-miR-1262	hsa-miR-29b-1-5p	hsa-miR-6761-5p	hsa-miR-6741-3p	hsa-miR-4713-3p
chr14:31163979-31177120+	hsa-miR-1182	hsa-miR-8065	hsa-miR-6891-3p	hsa-miR-6845-3p	hsa-miR-1915-5p
chr4:48512076-48517292-	hsa-miR-877-3p	hsa-miR-3145-5p	hsa-miR-4643	hsa-miR-297	hsa-miR-5002-3p
chr7:72617463-72619498+	hsa-miR-2115-5p	hsa-miR-892b	hsa-miR-1273e	hsa-miR-3182	hsa-miR-3652
chr2:70062987-70063153+	hsa-miR-6508-5p	hsa-miR-585-5p	hsa-miR-4280	hsa-miR-548q	hsa-miR-138-5p
chr9:15187969-15189631-	hsa-miR-2682-3p	hsa-miR-3938	hsa-miR-145-5p	hsa-miR-204-5p	hsa-miR-4427
chr10:93699709-93702325-	hsa-miR-6867-5p	hsa-miR-1827	hsa-miR-1285-3p	hsa-miR-3619-5p	hsa-miR-4758-5p
chr6:30457594-30457749+	hsa-miR-4714-5p	hsa-miR-6846-3p	hsa-miR-6789-3p	hsa-miR-3605-3p	hsa-miR-6887-3p
chr11:10824577-10827594-	hsa-miR-4778-3p	hsa-miR-708-5p	hsa-miR-3186-5p	hsa-miR-3660	hsa-miR-517c-3p
chr5:131923254-131927726+	hsa-miR-136-5p	hsa-miR-29a-5p	hsa-miR-5195-3p	hsa-miR-4421	hsa-miR-103a-2-5p
chr15:44907561-44949461-	hsa-miR-708-5p	hsa-miR-4723-5p	hsa-miR-7111-5p	hsa-miR-6827-5p	hsa-miR-6870-5p
chr11:33358621-33363232+	hsa-miR-654-3p	hsa-miR-4648	hsa-miR-421	hsa-miR-5699-3p	hsa-miR-1267
chr11:77033407-77033586-	hsa-miR-6511a-5p	hsa-miR-4448	hsa-miR-6813-5p	hsa-miR-499a-3p	hsa-miR-1910-3p
chr5:109976592-109978072-	hsa-miR-513c-5p	hsa-miR-455-3p	hsa-miR-5589-3p	hsa-miR-3619-5p	hsa-miR-214-3p
chr12:27455074-27465605+	hsa-miR-6752-5p	hsa-miR-7110-5p	hsa-miR-637	hsa-miR-6842-5p	hsa-miR-4732-5p
chr12:64195871-64199184+	hsa-miR-5089-3p	hsa-miR-6744-3p	hsa-miR-4753-5p	hsa-miR-6839-3p	hsa-miR-4717-5p
chr16:53307538-53308214+	hsa-miR-3614-3p	hsa-miR-342-3p	hsa-miR-6875-3p	hsa-miR-4786-3p	hsa-miR-4755-5p
chr4:107092252-107154221-	hsa-miR-512-5p	hsa-miR-3680-3p	hsa-miR-922	hsa-miR-452-3p	hsa-miR-3610
chr15:63349184-63354844+	hsa-miR-1236-3p	hsa-miR-4639-3p	hsa-miR-1184	hsa-miR-6882-3p	hsa-miR-6821-3p
chr4:184614742-184622961+	hsa-miR-95-3p	hsa-miR-4642	hsa-miR-764	hsa-miR-132-3p	hsa-miR-193a-5p
chr1:64017396-64018992+	hsa-miR-1303	hsa-miR-3664-3p	hsa-miR-4517	hsa-miR-135a-5p	hsa-miR-135b-5p
chr6:18236683-18250070-	hsa-miR-452-3p	hsa-miR-96-5p	hsa-miR-6876-3p	hsa-miR-6820-3p	hsa-miR-758-3p
chr19:39100236-39100665-	hsa-miR-4713-3p	hsa-miR-6798-5p	hsa-miR-6732-5p	hsa-miR-4268	hsa-miR-5196-3p
chr17:73951647-73952028-	hsa-miR-323b-5p	hsa-miR-494-5p	hsa-miR-410-5p	hsa-miR-128-2-5p	hsa-let-7f-5p
chr12:96691756-96694138-	hsa-miR-6883-3p	hsa-miR-1273g-3p	hsa-miR-1268b	hsa-miR-4720-5p	hsa-miR-1268a
chr12:51019759-51054102-	hsa-miR-6835-5p	hsa-miR-656-5p	hsa-miR-1827	hsa-miR-1304-5p	hsa-miR-4640-5p
chr7:50799969-50829711-	hsa-miR-6795-5p	hsa-miR-6773-5p	hsa-miR-6887-5p	hsa-miR-6781-5p	hsa-miR-891a-3p
chr2:29149571-29150391+	hsa-miR-5186	hsa-miR-146a-3p	hsa-miR-6769a-5p	hsa-miR-5088-5p	hsa-miR-4645-3p
chr11:73390699-73427390-	hsa-miR-892b	hsa-miR-4634	hsa-miR-7154-3p	hsa-miR-663a	hsa-miR-1273g-3p
chr11:134076494-134080348-	hsa-miR-1343-3p	hsa-miR-6783-3p	hsa-miR-328-5p	hsa-miR-5007-5p	hsa-miR-8060
chr19:20806496-20808456-	hsa-miR-3064-3p	hsa-miR-3925-3p	hsa-miR-135b-3p	hsa-miR-1224-5p	hsa-miR-6126
chr12:110345331-110346742+	hsa-miR-1281	hsa-miR-6812-3p	hsa-miR-4691-5p	hsa-miR-6791-3p	hsa-miR-1976
chr4:174305802-174325101+	hsa-miR-4707-3p	hsa-miR-6878-3p	hsa-miR-7705	hsa-miR-3194-5p	hsa-miR-1273a
chr10:103552596-103567658-	hsa-miR-6865-5p	hsa-miR-4448	hsa-miR-7114-5p	hsa-miR-5011-3p	hsa-miR-492
chr14:35233913-35234139-	hsa-miR-5196-3p	hsa-miR-5687	hsa-miR-412-5p	hsa-miR-1306-5p	hsa-miR-6785-3p
chr12:10131565-10168326+	hsa-miR-6880-5p	hsa-miR-5189-3p	hsa-miR-4420	hsa-miR-6738-5p	hsa-miR-6853-5p
chr2:158607745-158675071-	hsa-miR-328-5p	hsa-miR-6885-5p	hsa-miR-340-3p	hsa-miR-4763-3p	hsa-miR-6775-3p
chr17:27725246-27778698+	hsa-miR-1273h-5p	hsa-miR-4707-3p	hsa-miR-1268b	hsa-miR-1268a	hsa-miR-6780a-5p
chr4:2659530-2665015+	hsa-miR-3605-5p	hsa-miR-2392	hsa-miR-22-5p	hsa-miR-3200-5p	hsa-miR-6508-3p
chr12:105742380-105789491+	hsa-miR-3180-3p	hsa-miR-6749-3p	hsa-miR-4634	hsa-miR-4707-3p	hsa-miR-7160-3p
chr15:68467975-68468992+	hsa-miR-4695-3p	hsa-miR-181a-3p	hsa-miR-4705	hsa-miR-3670	hsa-miR-6778-5p
chr1:29313943-29323831+	hsa-miR-6868-3p	hsa-miR-146a-3p	hsa-miR-4733-5p	hsa-miR-4432	hsa-miR-7974
chr7:43129891-43130075-	hsa-miR-3925-3p	hsa-miR-212-3p	hsa-miR-132-3p	hsa-miR-3664-5p	hsa-miR-6794-3p
chr1:171493960-171496983+	hsa-miR-3147	hsa-miR-8069	hsa-miR-6134	hsa-miR-6851-5p	hsa-miR-4736
chr10:53445439-53448382+	hsa-miR-92a-2-5p	hsa-miR-7110-5p	hsa-miR-6752-5p	hsa-miR-3916	hsa-miR-4723-5p
chr14:35522484-35522657+	hsa-miR-3913-5p	hsa-miR-202-5p	hsa-miR-4529-5p	hsa-miR-365b-5p	hsa-miR-1972
chr17:61882431-61884014+	hsa-miR-6851-5p	hsa-miR-7114-5p	hsa-miR-487b-5p	hsa-miR-3663-5p	hsa-miR-548q
chr10:49609655-49618211+	hsa-miR-6755-3p	hsa-miR-30c-5p	hsa-miR-30e-5p	hsa-miR-876-5p	hsa-miR-433-3p
chr8:27605594-27622768-	hsa-miR-541-3p	hsa-miR-6758-3p	hsa-miR-4537	hsa-miR-7111-3p	hsa-miR-6833-3p
chr13:20425495-20426330-	hsa-miR-3173-3p	hsa-miR-3925-3p	hsa-miR-6823-5p	hsa-miR-6501-5p	hsa-miR-4463
chr1:145897085-145900490+	hsa-miR-155-3p	hsa-miR-4795-5p	hsa-miR-3976	hsa-miR-4427	hsa-miR-2355-5p
chr1:220191791-220203822-	hsa-miR-767-3p	hsa-miR-424-5p	hsa-miR-3127-5p	hsa-miR-1266-5p	hsa-miR-5195-3p
chr5:30513885-30514041+	hsa-miR-7162-5p	hsa-miR-6875-3p	hsa-miR-516a-3p	hsa-miR-516b-3p	hsa-miR-6719-3p
chr1:185143504-185144245+	hsa-miR-6875-3p	hsa-miR-892c-3p	hsa-miR-15b-3p	hsa-miR-5187-5p	hsa-miR-338-3p
chr2:162223989-162251714+	hsa-miR-4297	hsa-miR-5006-5p	hsa-miR-6502-3p	hsa-miR-6077	hsa-miR-3065-5p
chr14:21968637-21970045-	hsa-miR-6503-5p	hsa-miR-6764-5p	hsa-miR-596	hsa-miR-4793-3p	hsa-miR-6724-5p
chr4:106111517-106112092+	hsa-miR-6740-5p	hsa-miR-200c-5p	hsa-miR-4719	hsa-miR-6751-3p	hsa-miR-30c-1-3p
chr12:123265711-123273476+	hsa-miR-7156-5p	hsa-miR-4259	hsa-miR-4761-3p	hsa-miR-4423-5p	hsa-miR-515-3p
chr1:176085760-176118210-	hsa-miR-6873-3p	hsa-miR-4534	hsa-miR-708-5p	hsa-miR-1304-5p	hsa-miR-490-3p
chr16:17548979-17552647-	hsa-miR-541-3p	hsa-miR-711	hsa-miR-4667-5p	hsa-miR-6848-5p	hsa-miR-6508-3p
chr10:22737654-22737918+	hsa-miR-4502	hsa-miR-3909	hsa-miR-1238-5p	hsa-miR-205-5p	hsa-miR-939-5p
chr5:142168995-142172338+	hsa-miR-299-3p	hsa-miR-6759-5p	hsa-miR-342-5p	hsa-miR-6080	hsa-miR-4664-5p
chr9:92089454-92090465-	hsa-miR-6736-3p	hsa-miR-6827-5p	hsa-miR-1911-3p	hsa-miR-5004-5p	hsa-miR-4722-3p
chr1:21268578-21276601-	hsa-miR-8089	hsa-miR-8082	hsa-miR-548g-3p	hsa-miR-5094	hsa-miR-4667-5p
chr10:27356086-27368090-	hsa-miR-129-5p	hsa-miR-1302	hsa-miR-1255b-5p	hsa-miR-5196-5p	hsa-miR-205-5p
chr1:150413399-150416853+	hsa-miR-6737-3p	hsa-miR-4682	hsa-miR-5008-3p	hsa-miR-2909	hsa-miR-1296-5p
chr6:160109182-160113738-	hsa-miR-1254	hsa-miR-5000-3p	hsa-miR-2467-3p	hsa-miR-3661	hsa-miR-3972
chr7:148809229-148815440-	hsa-miR-2355-3p	hsa-miR-1248	hsa-miR-1179	hsa-miR-4727-5p	hsa-miR-6780b-3p
chr3:125170149-125176209-	hsa-miR-4677-5p	hsa-miR-6739-3p	hsa-miR-5685	hsa-miR-6791-3p	hsa-miR-6815-3p
chr6:109466422-109477080+	hsa-miR-127-5p	hsa-miR-3620-5p	hsa-miR-1587	hsa-miR-4760-5p	hsa-miR-6776-5p
chr22:43222946-43231499-	hsa-miR-4647	hsa-miR-668-3p	hsa-miR-8075	hsa-miR-4663	hsa-miR-3613-5p
chr16:53288350-53289691+	hsa-miR-1236-3p	hsa-miR-423-3p	hsa-miR-4778-3p	hsa-miR-149-5p	hsa-miR-93-3p
chr19:54969493-54969700-	hsa-miR-6741-3p	hsa-miR-6771-5p	hsa-miR-4794	hsa-miR-212-5p	hsa-miR-3138
chr3:129579783-129599405-	hsa-miR-1273h-5p	hsa-miR-6780a-5p	hsa-miR-30b-3p	hsa-miR-3689b-3p	hsa-miR-3689c
chr15:81271107-81274523-	hsa-miR-383-5p	hsa-miR-4797-3p	hsa-miR-598-3p	hsa-miR-6780a-3p	hsa-miR-4704-3p
chr2:48869541-48898819+	hsa-miR-150-3p	hsa-miR-3692-5p	hsa-miR-591	hsa-miR-30d-3p	hsa-miR-30a-3p
chr3:56694759-56707753-	hsa-miR-3692-3p	hsa-miR-624-3p	hsa-miR-3607-3p	hsa-miR-4320	hsa-miR-1245b-3p
chr6:74190398-74191967+	hsa-miR-4671-5p	hsa-miR-1184	hsa-miR-3127-5p	hsa-miR-4638-5p	hsa-miR-548q
chr20:18190072-18190855-	hsa-miR-1228-3p	hsa-miR-342-3p	hsa-miR-502-5p	hsa-miR-6841-3p	hsa-miR-1306-5p
chr3:114219199-114221711-	hsa-miR-6873-3p	hsa-miR-6809-3p	hsa-miR-4753-3p	hsa-miR-7110-3p	hsa-miR-130b-5p
chr16:14678204-14678648-	hsa-miR-569	hsa-miR-488-3p	hsa-miR-6757-5p	hsa-miR-6730-5p	hsa-miR-4764-5p
chr16:31388321-31388586+	hsa-miR-7156-5p	hsa-miR-3192-5p	hsa-miR-6840-3p	hsa-miR-7152-3p	hsa-miR-6131
chr6:76344423-76380436+	hsa-miR-503-3p	hsa-miR-3182	hsa-miR-3613-5p	hsa-miR-526b-5p	hsa-miR-6165
chr2:99217046-99220654-	hsa-miR-1273g-3p	hsa-miR-566	hsa-miR-1296-5p	hsa-miR-891b	hsa-miR-380-3p
chr12:88509255-88510310-	hsa-miR-20a-3p	hsa-miR-6815-3p	hsa-miR-4743-3p	hsa-miR-3942-3p	hsa-miR-4475
chr17:38567606-38569478-	hsa-miR-653-3p	hsa-miR-9-5p	hsa-miR-92a-1-5p	hsa-miR-301a-3p	hsa-miR-301b-3p
chr5:55251853-55253119-	hsa-miR-3137	hsa-miR-6808-5p	hsa-let-7a-2-3p	hsa-miR-4695-5p	hsa-let-7g-3p
chr2:32818982-32828150+	hsa-miR-6072	hsa-miR-432-5p	hsa-miR-888-3p	hsa-miR-1827	hsa-miR-605-5p
chrX:109263580-109310624+	hsa-miR-7160-3p	hsa-miR-4327	hsa-miR-6764-5p	hsa-miR-6762-3p	hsa-miR-1915-3p
chr10:114220283-114224416+	hsa-miR-6758-3p	hsa-miR-608	hsa-miR-6737-5p	hsa-miR-367-5p	hsa-miR-6819-5p
chr1:84644860-84680000+	hsa-miR-6890-3p	hsa-miR-4470	hsa-miR-888-3p	hsa-miR-4527	hsa-miR-659-5p
chr9:128031215-128035928+	hsa-miR-593-5p	hsa-miR-1304-5p	hsa-miR-1273a	hsa-miR-4459	hsa-miR-4778-5p
chr2:190442945-190443198-	hsa-miR-3121-5p	hsa-miR-507	hsa-miR-365a-5p	hsa-miR-6881-3p	hsa-miR-4648
chr8:68172050-68189692-	hsa-miR-6780b-3p	hsa-miR-125a-3p	hsa-miR-6733-3p	hsa-miR-4693-3p	hsa-miR-4425
chr10:70161377-70164601-	hsa-miR-5010-5p	hsa-miR-6887-5p	hsa-miR-6795-5p	hsa-miR-6780a-3p	hsa-miR-4468
chr17:15391202-15391648-	hsa-miR-1273g-3p	hsa-miR-6826-3p	hsa-miR-450a-2-3p	hsa-miR-6749-3p	hsa-miR-6887-3p
chr5:109049221-109091157+	hsa-miR-627-5p	hsa-miR-924	hsa-miR-30c-5p	hsa-miR-30b-5p	hsa-miR-3657
chr13:37614542-37625720-	hsa-miR-23c	hsa-miR-4266	hsa-miR-642a-3p	hsa-miR-499a-3p	hsa-miR-4719
chr6:147636651-147646220+	hsa-miR-873-3p	hsa-miR-6797-5p	hsa-miR-4656	hsa-miR-597-3p	hsa-miR-619-3p
chr11:61079256-61079556-	hsa-miR-187-3p	hsa-miR-8058	hsa-miR-432-5p	hsa-miR-5706	hsa-miR-1301-3p
chr4:185552919-185559622-	hsa-miR-412-3p	hsa-miR-544b	hsa-miR-670-5p	hsa-miR-6754-3p	hsa-miR-378a-5p
chr4:4317363-4317697+	hsa-miR-3692-3p	hsa-miR-6743-3p	hsa-miR-218-5p	hsa-miR-3121-5p	hsa-miR-125a-3p
chr2:136389288-136403097+	hsa-miR-3692-5p	hsa-miR-4763-5p	hsa-miR-4762-3p	hsa-miR-5589-5p	hsa-miR-6865-5p
chr2:68592321-68621308+	hsa-miR-653-3p	hsa-miR-6755-3p	hsa-miR-1254	hsa-miR-7160-5p	hsa-miR-503-5p
chr4:148886175-148887990+	hsa-miR-4765	hsa-miR-6875-3p	hsa-miR-3692-3p	hsa-miR-3191-5p	hsa-miR-3064-3p
chr14:65922339-65927869+	hsa-miR-3667-5p	hsa-miR-512-5p	hsa-miR-150-3p	hsa-miR-4753-5p	hsa-miR-8485
chr3:183558358-183562114-	hsa-miR-4659a-5p	hsa-miR-6817-5p	hsa-miR-4659b-5p	hsa-miR-1912	hsa-miR-485-5p
chr20:3300209-3303343-	hsa-miR-642b-3p	hsa-miR-642a-3p	hsa-miR-6778-3p	hsa-miR-425-5p	hsa-miR-6780b-5p
chr13:42439872-42442613-	hsa-miR-942-5p	hsa-miR-302d-5p	hsa-miR-5587-5p	hsa-miR-873-3p	hsa-miR-4684-5p
chrM:5073-5337+	hsa-miR-3162-5p	hsa-miR-1244	hsa-miR-6869-5p	hsa-miR-92a-2-5p	hsa-miR-6857-5p
chr17:16004564-16005071-	hsa-miR-383-3p	hsa-miR-6072	hsa-miR-6891-5p	hsa-miR-6797-5p	hsa-miR-5010-5p
chrY:21901414-21903743-	hsa-miR-6769a-5p	hsa-miR-450b-5p	hsa-miR-4717-3p	hsa-miR-6769b-5p	hsa-miR-139-3p
chr17:67251684-67252424-	hsa-miR-29b-3p	hsa-miR-29c-3p	hsa-miR-29a-3p	hsa-miR-432-3p	hsa-miR-3972
chr18:39575854-39607512+	hsa-miR-4676-5p	hsa-miR-4459	hsa-miR-185-3p	hsa-miR-3116	hsa-miR-6500-5p
chr14:100808735-100809724-	hsa-miR-6132	hsa-miR-6836-5p	hsa-miR-504-3p	hsa-miR-6880-5p	hsa-miR-183-5p
chr7:73520205-73520573-	hsa-miR-3943	hsa-miR-4706	hsa-miR-6777-5p	hsa-miR-515-3p	hsa-miR-3151-5p
chr22:32883732-32891517+	hsa-miR-6767-5p	hsa-miR-221-3p	hsa-miR-4680-5p	hsa-miR-301a-5p	hsa-miR-370-5p
chr18:8085669-8088849+	hsa-miR-7157-3p	hsa-miR-223-3p	hsa-miR-7155-3p	hsa-miR-1193	hsa-miR-5588-5p
chr18:21087949-21099138+	hsa-miR-4490	hsa-miR-4474-3p	hsa-miR-5090	hsa-miR-4536-5p	hsa-miR-486-3p
chrX:67454329-67518938-	hsa-miR-545-3p	hsa-miR-34a-3p	hsa-miR-7843-3p	hsa-miR-6511a-3p	hsa-miR-1184
chr15:63951935-63956793-	hsa-miR-4778-3p	hsa-miR-6808-3p	hsa-miR-2115-5p	hsa-miR-5708	hsa-miR-7974
chr14:92053546-92126325-	hsa-miR-145-5p	hsa-miR-5195-3p	hsa-miR-4443	hsa-miR-4796-3p	hsa-miR-3065-3p
chr6:47544260-47577040+	hsa-miR-892b	hsa-miR-4724-3p	hsa-miR-6874-5p	hsa-miR-4745-3p	hsa-miR-4485-3p
chr17:57148184-57161450-	hsa-miR-6509-3p	hsa-miR-548ao-3p	hsa-miR-1273g-3p	hsa-miR-6750-3p	hsa-miR-3680-5p
chr2:37143221-37152351-	hsa-miR-328-3p	hsa-miR-5193	hsa-miR-6851-3p	hsa-miR-670-5p	hsa-miR-7113-3p
chr2:61566486-61566816-	hsa-miR-3977	hsa-miR-6807-3p	hsa-miR-188-3p	hsa-miR-654-3p	hsa-miR-3607-3p
chr16:19627436-19663412+	hsa-miR-3690	hsa-miR-6862-5p	hsa-miR-1538	hsa-miR-1301-3p	hsa-miR-192-3p
chr13:36886282-36886614-	hsa-miR-2115-5p	hsa-miR-103a-2-5p	hsa-miR-187-5p	hsa-miR-362-5p	hsa-miR-29a-3p
chr12:51689580-51693498-	hsa-miR-6878-3p	hsa-miR-613	hsa-miR-1244	hsa-miR-4524b-5p	hsa-miR-6736-3p
chr11:128933834-128936670-	hsa-miR-4436b-5p	hsa-miR-378h	hsa-miR-378c	hsa-miR-378e	hsa-miR-378a-3p
chr3:170841385-170858298-	hsa-miR-4700-5p	hsa-miR-8089	hsa-miR-6815-3p	hsa-miR-4268	hsa-miR-4667-5p
chr22:29105994-29108005-	hsa-miR-4482-3p	hsa-miR-4502	hsa-miR-346	hsa-miR-8075	hsa-miR-4652-3p
chr14:39646616-39647120+	hsa-miR-6841-5p	hsa-miR-204-5p	hsa-miR-5006-3p	hsa-miR-3121-5p	hsa-miR-211-5p
chr18:19345733-19348713+	hsa-miR-3156-3p	hsa-miR-181a-3p	hsa-miR-3685	hsa-miR-6770-3p	hsa-miR-6892-3p
chr1:33097428-33099711-	hsa-miR-5197-3p	hsa-miR-6839-3p	hsa-miR-516b-3p	hsa-miR-516a-3p	hsa-miR-6792-3p
chr2:208589524-208598771+	hsa-miR-1236-3p	hsa-miR-3064-5p	hsa-miR-636	hsa-miR-6881-3p	hsa-miR-218-5p
chr16:23894094-23894468+	hsa-let-7e-5p	hsa-let-7b-5p	hsa-let-7c-5p	hsa-let-7d-5p	hsa-miR-5190
chr10:65213156-65214849-	hsa-miR-5095	hsa-miR-548av-3p	hsa-miR-1285-5p	hsa-miR-548ar-3p	hsa-miR-548az-3p
chr8:17123416-17137952+	hsa-miR-7847-3p	hsa-miR-6894-5p	hsa-miR-766-5p	hsa-miR-4760-3p	hsa-miR-3121-5p
chr8:28950262-28967587-	hsa-miR-3141	hsa-miR-6787-5p	hsa-miR-6893-3p	hsa-miR-1908-3p	hsa-miR-4772-3p
[truncated: 806 more rows]
